# Supplementary material for: Exploration of Refined Humane Endpoints for Melioidosis in BALB/c Mice
Source: Research Square preprint supplement (doi:10.21203/rs.3.rs-5439132/v1), 2025-01-13
Supplement: Supplementary file 1 [file 29da87ff2281defbe5eb97b6.docx]

# Exploration of Refined Humane Endpoints for Melioidosis in BALB/c Mice

**Supplementary Material**

**Table A1.** Treatment group comparisons for each of the four studies. In each case, a comparison is made between the mice receiving the named treatment listed in group A versus the mice receiving the named treatment listed in group B.

| **Study** | **Treatment Group A** | **Treatment Group B** |
| --- | --- | --- |
| Study 1 | Finafloxacin, n= 45 | Diluent Control, n= 15 |
| Co-trimoxazole, n= 45 | Diluent Control, n= 15 |
| Co-trimoxazole, n= 45 | Finafloxacin, n= 45 |
| Study 2 | Finafloxacin, n= 90 | Diluent Control, n= 20 |
| Study 3 | Finafloxacin, n= 40 | Diluent Control, n= 15 |
| Doxycycline, n= 40 | Diluent Control, n= 15 |
| Doxycycline, n= 40 | Finafloxacin, n= 40 |
| Finafloxacin & doxycycline, n= 40 | Diluent Control, n= 15 |
| Finafloxacin & doxycycline, n= 40 | Finafloxacin, n= 40 |
| Finafloxacin & doxycycline, n= 40 | Doxycycline, n= 40 |
| Study 4 | Finafloxacin, n = 45 (36h) | Finafloxacin, n = 44 (48h) |
| Finafloxacin, n = 45 (36h) | Diluent Control, n= 88 |
| Finafloxacin, n = 44 (48h) | Diluent Control, n = 88 |


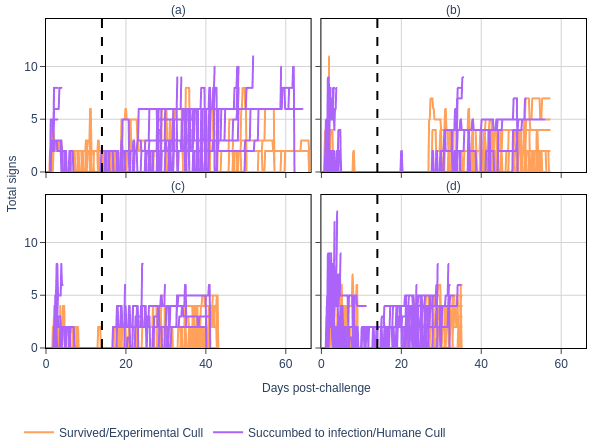


**Figure A1.** Total clinical signs scores over time per mouse, by survival outcome for (a) Study 1, (b) Study 2, (c) Study 3, and (d) Study 4. The vertical dashed lines are drawn at 14 days post-challenge to indicate when the analyses was initiated.


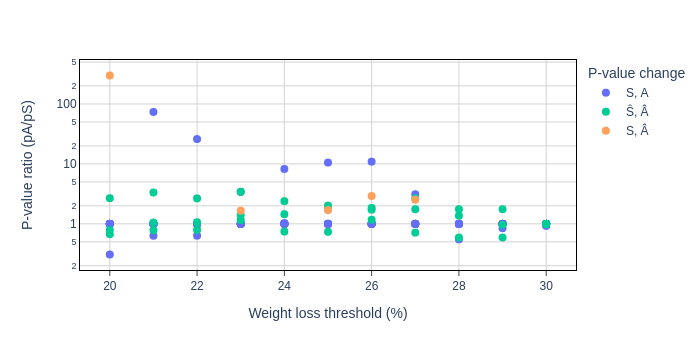


**Figure A2.** P-value ratios of treatment group comparisons for different weight loss thresholds (without signs-based thresholds applied). The blue points show instances where both the original study comparison (S) and the alternative comparison (A) were significant (S, A). The green points show instances where both the original study comparison and the alternative comparison were not significant (Ŝ, Â).The orange points show instances where the original study comparison was significant but the alternative comparison was not significant (S, Â).


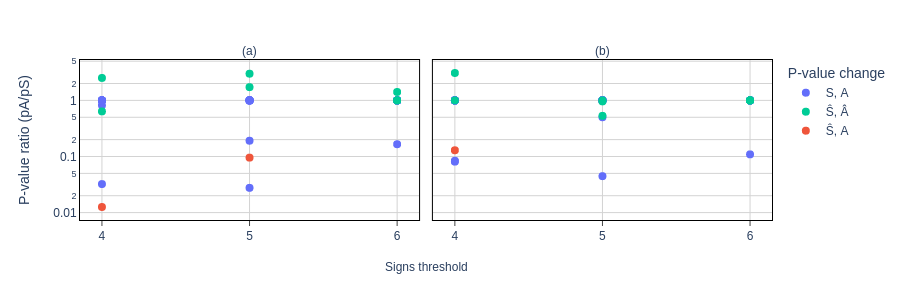
 **Figure A3.** P-value ratios of treatment group comparisons for different sign-based thresholds (without weight loss thresholds applied), for (a) ‘total signs’ and (b) ‘average total signs’ (the mean of ‘total signs’ over the preceding 48h period). The blue points show instances where both the original study comparison (S) and the alternative comparison (A) were significant (S, A). The green points show instances where both the original study comparison and the alternative comparison were not significant (Ŝ, Â).The red points show instances where the original study comparison was not significant but the alternative comparison was significant (Ŝ, A).


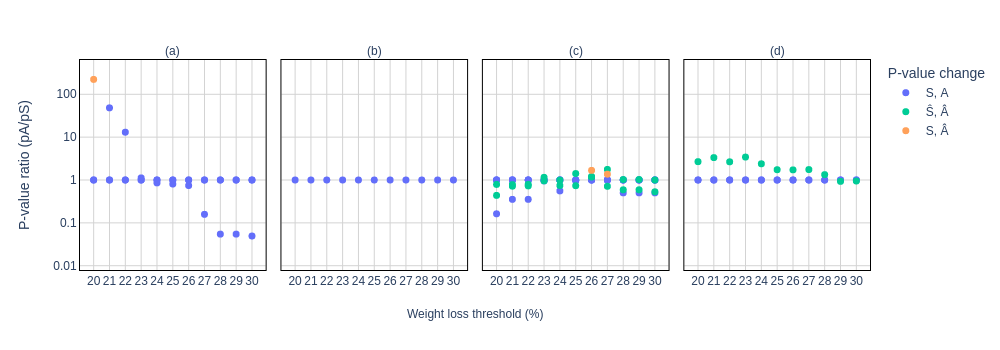


**Figure A4.** P-value ratios of treatment group comparisons for (a) Study 1, (b) Study 2, (c) Study 3, and (d) Study 4. An average total clinical signs threshold of ≥5 is combined with different weight thresholds. The blue points show instances where both the original study comparison (S) and the alternative comparison (A) were significant (S, A). The green points show instances where both the original study comparison and the alternative comparison were not significant (Ŝ, Â). The orange points show instances where the original study comparison was significant but the alternative comparison was not significant (S, Â).


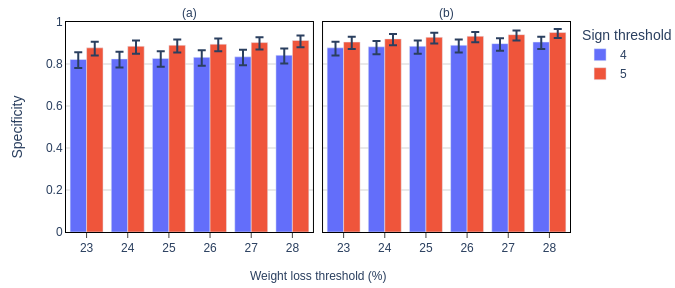


**Figure A5.** Specificity across refined humane endpoints derived according to weight loss threshold (x-axes), sign threshold (color), and (a) ‘total signs’ metric, and (b) ‘average total signs’ metric. The error bars represent the 95% confidence interval for the specificity.


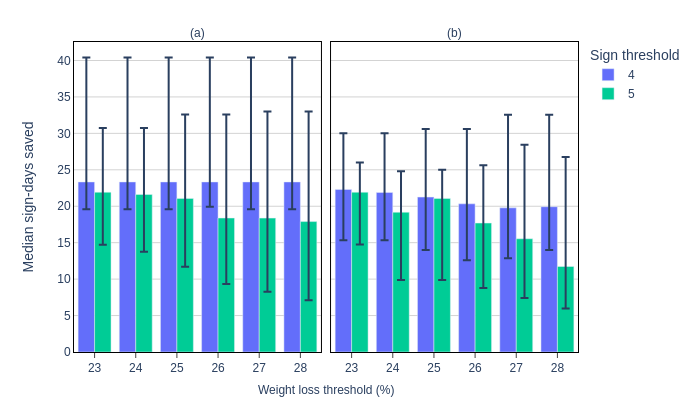


**Figure A6.** ‘Median sign-days saved’ per mouse across refined humane endpoints derived according to weight loss threshold (x-axes), sign threshold (color), and (a) ‘total signs’ metric, and (b) ‘average total signs’ metric. The error bars represent the 95% confidence interval for the ‘median sign-days saved’.

**Table A2.** Logrank test results for the comparisons between treatment groups for each of the four studies, split by the signs threshold metric type, signs threshold value and weight threshold value. Information for the logrank test using the alternative endpoint comparison and orginal study comparison are presented, along with the p-value ratio and indicator of whether a change in significance resulted. These data were used for Figure 3 and Figure A4.

| **Study** | **Threshold Metric** | **Signs threshold** | **Weight threshold** | **Comparison  Group A** | | **Comparison  Group B** | | **Alternative endpoint  Comparison** | | | **Original study  comparison** | | | **P-value ratio** | **P-value ratio change** |
| --- | --- | --- | --- | --- | --- | --- | --- | --- | --- | --- | --- | --- | --- | --- | --- |
| **Treatment** | **n** | **Treatment** | **n** | **Test statistic** | **df** | **p-value** | **Test statistic** | **df** | **p-value** |
| 1 | Total signs | ≥4 | 20 | Finafloxacin | 45 | Diluent Control | 15 | 83.192904 | 1 | 7.442441E-20 | 83.192904 | 1 | 7.442441E-20 | 1.000000 | S, A |
| 1 | Average signs | ≥4 | 20 | Finafloxacin | 45 | Diluent Control | 15 | 83.192904 | 1 | 7.442441E-20 | 83.192904 | 1 | 7.442441E-20 | 1.000000 | S, A |
| 1 | Total signs | ≥4 | 21 | Finafloxacin | 45 | Diluent Control | 15 | 83.192904 | 1 | 7.442441E-20 | 83.192904 | 1 | 7.442441E-20 | 1.000000 | S, A |
| 1 | Average signs | ≥4 | 21 | Finafloxacin | 45 | Diluent Control | 15 | 83.192904 | 1 | 7.442441E-20 | 83.192904 | 1 | 7.442441E-20 | 1.000000 | S, A |
| 1 | Total signs | ≥4 | 22 | Finafloxacin | 45 | Diluent Control | 15 | 83.192904 | 1 | 7.442441E-20 | 83.192904 | 1 | 7.442441E-20 | 1.000000 | S, A |
| 1 | Average signs | ≥4 | 22 | Finafloxacin | 45 | Diluent Control | 15 | 83.192904 | 1 | 7.442441E-20 | 83.192904 | 1 | 7.442441E-20 | 1.000000 | S, A |
| 1 | Total signs | ≥4 | 23 | Finafloxacin | 45 | Diluent Control | 15 | 83.192904 | 1 | 7.442441E-20 | 83.192904 | 1 | 7.442441E-20 | 1.000000 | S, A |
| 1 | Average signs | ≥4 | 23 | Finafloxacin | 45 | Diluent Control | 15 | 83.192904 | 1 | 7.442441E-20 | 83.192904 | 1 | 7.442441E-20 | 1.000000 | S, A |
| 1 | Total signs | ≥4 | 24 | Finafloxacin | 45 | Diluent Control | 15 | 83.192904 | 1 | 7.442441E-20 | 83.192904 | 1 | 7.442441E-20 | 1.000000 | S, A |
| 1 | Average signs | ≥4 | 24 | Finafloxacin | 45 | Diluent Control | 15 | 83.192904 | 1 | 7.442441E-20 | 83.192904 | 1 | 7.442441E-20 | 1.000000 | S, A |
| 1 | Total signs | ≥4 | 25 | Finafloxacin | 45 | Diluent Control | 15 | 83.192904 | 1 | 7.442441E-20 | 83.192904 | 1 | 7.442441E-20 | 1.000000 | S, A |
| 1 | Average signs | ≥4 | 25 | Finafloxacin | 45 | Diluent Control | 15 | 83.192904 | 1 | 7.442441E-20 | 83.192904 | 1 | 7.442441E-20 | 1.000000 | S, A |
| 1 | Total signs | ≥4 | 26 | Finafloxacin | 45 | Diluent Control | 15 | 83.192904 | 1 | 7.442441E-20 | 83.192904 | 1 | 7.442441E-20 | 1.000000 | S, A |
| 1 | Average signs | ≥4 | 26 | Finafloxacin | 45 | Diluent Control | 15 | 83.192904 | 1 | 7.442441E-20 | 83.192904 | 1 | 7.442441E-20 | 1.000000 | S, A |
| 1 | Total signs | ≥4 | 27 | Finafloxacin | 45 | Diluent Control | 15 | 83.192904 | 1 | 7.442441E-20 | 83.192904 | 1 | 7.442441E-20 | 1.000000 | S, A |
| 1 | Average signs | ≥4 | 27 | Finafloxacin | 45 | Diluent Control | 15 | 83.192904 | 1 | 7.442441E-20 | 83.192904 | 1 | 7.442441E-20 | 1.000000 | S, A |
| 1 | Total signs | ≥4 | 28 | Finafloxacin | 45 | Diluent Control | 15 | 83.192904 | 1 | 7.442441E-20 | 83.192904 | 1 | 7.442441E-20 | 1.000000 | S, A |
| 1 | Average signs | ≥4 | 28 | Finafloxacin | 45 | Diluent Control | 15 | 83.192904 | 1 | 7.442441E-20 | 83.192904 | 1 | 7.442441E-20 | 1.000000 | S, A |
| 1 | Total signs | ≥4 | 29 | Finafloxacin | 45 | Diluent Control | 15 | 83.192904 | 1 | 7.442441E-20 | 83.192904 | 1 | 7.442441E-20 | 1.000000 | S, A |
| 1 | Average signs | ≥4 | 29 | Finafloxacin | 45 | Diluent Control | 15 | 83.192904 | 1 | 7.442441E-20 | 83.192904 | 1 | 7.442441E-20 | 1.000000 | S, A |
| 1 | Total signs | ≥4 | 30 | Finafloxacin | 45 | Diluent Control | 15 | 83.192904 | 1 | 7.442441E-20 | 83.192904 | 1 | 7.442441E-20 | 1.000000 | S, A |
| 1 | Average signs | ≥4 | 30 | Finafloxacin | 45 | Diluent Control | 15 | 83.192904 | 1 | 7.442441E-20 | 83.192904 | 1 | 7.442441E-20 | 1.000000 | S, A |
| 1 | Total signs | ≥4 | 20 | Co-trimoxazole | 45 | Diluent Control | 15 | 83.192904 | 1 | 7.442441E-20 | 83.192904 | 1 | 7.442441E-20 | 1.000000 | S, A |
| 1 | Average signs | ≥4 | 20 | Co-trimoxazole | 45 | Diluent Control | 15 | 83.192904 | 1 | 7.442441E-20 | 83.192904 | 1 | 7.442441E-20 | 1.000000 | S, A |
| 1 | Total signs | ≥4 | 21 | Co-trimoxazole | 45 | Diluent Control | 15 | 83.192904 | 1 | 7.442441E-20 | 83.192904 | 1 | 7.442441E-20 | 1.000000 | S, A |
| 1 | Average signs | ≥4 | 21 | Co-trimoxazole | 45 | Diluent Control | 15 | 83.192904 | 1 | 7.442441E-20 | 83.192904 | 1 | 7.442441E-20 | 1.000000 | S, A |
| 1 | Total signs | ≥4 | 22 | Co-trimoxazole | 45 | Diluent Control | 15 | 83.192904 | 1 | 7.442441E-20 | 83.192904 | 1 | 7.442441E-20 | 1.000000 | S, A |
| 1 | Average signs | ≥4 | 22 | Co-trimoxazole | 45 | Diluent Control | 15 | 83.192904 | 1 | 7.442441E-20 | 83.192904 | 1 | 7.442441E-20 | 1.000000 | S, A |
| 1 | Total signs | ≥4 | 23 | Co-trimoxazole | 45 | Diluent Control | 15 | 83.192904 | 1 | 7.442441E-20 | 83.192904 | 1 | 7.442441E-20 | 1.000000 | S, A |
| 1 | Average signs | ≥4 | 23 | Co-trimoxazole | 45 | Diluent Control | 15 | 83.192904 | 1 | 7.442441E-20 | 83.192904 | 1 | 7.442441E-20 | 1.000000 | S, A |
| 1 | Total signs | ≥4 | 24 | Co-trimoxazole | 45 | Diluent Control | 15 | 83.192904 | 1 | 7.442441E-20 | 83.192904 | 1 | 7.442441E-20 | 1.000000 | S, A |
| 1 | Average signs | ≥4 | 24 | Co-trimoxazole | 45 | Diluent Control | 15 | 83.192904 | 1 | 7.442441E-20 | 83.192904 | 1 | 7.442441E-20 | 1.000000 | S, A |
| 1 | Total signs | ≥4 | 25 | Co-trimoxazole | 45 | Diluent Control | 15 | 83.192904 | 1 | 7.442441E-20 | 83.192904 | 1 | 7.442441E-20 | 1.000000 | S, A |
| 1 | Average signs | ≥4 | 25 | Co-trimoxazole | 45 | Diluent Control | 15 | 83.192904 | 1 | 7.442441E-20 | 83.192904 | 1 | 7.442441E-20 | 1.000000 | S, A |
| 1 | Total signs | ≥4 | 26 | Co-trimoxazole | 45 | Diluent Control | 15 | 83.192904 | 1 | 7.442441E-20 | 83.192904 | 1 | 7.442441E-20 | 1.000000 | S, A |
| 1 | Average signs | ≥4 | 26 | Co-trimoxazole | 45 | Diluent Control | 15 | 83.192904 | 1 | 7.442441E-20 | 83.192904 | 1 | 7.442441E-20 | 1.000000 | S, A |
| 1 | Total signs | ≥4 | 27 | Co-trimoxazole | 45 | Diluent Control | 15 | 83.192904 | 1 | 7.442441E-20 | 83.192904 | 1 | 7.442441E-20 | 1.000000 | S, A |
| 1 | Average signs | ≥4 | 27 | Co-trimoxazole | 45 | Diluent Control | 15 | 83.192904 | 1 | 7.442441E-20 | 83.192904 | 1 | 7.442441E-20 | 1.000000 | S, A |
| 1 | Total signs | ≥4 | 28 | Co-trimoxazole | 45 | Diluent Control | 15 | 83.192904 | 1 | 7.442441E-20 | 83.192904 | 1 | 7.442441E-20 | 1.000000 | S, A |
| 1 | Average signs | ≥4 | 28 | Co-trimoxazole | 45 | Diluent Control | 15 | 83.192904 | 1 | 7.442441E-20 | 83.192904 | 1 | 7.442441E-20 | 1.000000 | S, A |
| 1 | Total signs | ≥4 | 29 | Co-trimoxazole | 45 | Diluent Control | 15 | 83.192904 | 1 | 7.442441E-20 | 83.192904 | 1 | 7.442441E-20 | 1.000000 | S, A |
| 1 | Average signs | ≥4 | 29 | Co-trimoxazole | 45 | Diluent Control | 15 | 83.192904 | 1 | 7.442441E-20 | 83.192904 | 1 | 7.442441E-20 | 1.000000 | S, A |
| 1 | Total signs | ≥4 | 30 | Co-trimoxazole | 45 | Diluent Control | 15 | 83.192904 | 1 | 7.442441E-20 | 83.192904 | 1 | 7.442441E-20 | 1.000000 | S, A |
| 1 | Average signs | ≥4 | 30 | Co-trimoxazole | 45 | Diluent Control | 15 | 83.192904 | 1 | 7.442441E-20 | 83.192904 | 1 | 7.442441E-20 | 1.000000 | S, A |
| 1 | Total signs | ≥4 | 20 | Co-trimoxazole | 45 | Finafloxacin | 45 | 2.961731 | 1 | 8.525661E-02 | 11.725428 | 1 | 6.165186E-04 | 138.287152 | S, Â |
| 1 | Average signs | ≥4 | 20 | Co-trimoxazole | 45 | Finafloxacin | 45 | 2.251945 | 1 | 1.334466E-01 | 11.725428 | 1 | 6.165186E-04 | 216.451820 | S, Â |
| 1 | Total signs | ≥4 | 21 | Co-trimoxazole | 45 | Finafloxacin | 45 | 5.401591 | 1 | 2.011841E-02 | 11.725428 | 1 | 6.165186E-04 | 32.632279 | S, A |
| 1 | Average signs | ≥4 | 21 | Co-trimoxazole | 45 | Finafloxacin | 45 | 4.494211 | 1 | 3.400980E-02 | 11.725428 | 1 | 6.165186E-04 | 55.164267 | S, A |
| 1 | Total signs | ≥4 | 22 | Co-trimoxazole | 45 | Finafloxacin | 45 | 8.095190 | 1 | 4.438288E-03 | 11.725428 | 1 | 6.165186E-04 | 7.198952 | S, A |
| 1 | Average signs | ≥4 | 22 | Co-trimoxazole | 45 | Finafloxacin | 45 | 6.851295 | 1 | 8.857705E-03 | 11.725428 | 1 | 6.165186E-04 | 14.367295 | S, A |
| 1 | Total signs | ≥4 | 23 | Co-trimoxazole | 45 | Finafloxacin | 45 | 12.456111 | 1 | 4.166264E-04 | 11.725428 | 1 | 6.165186E-04 | 0.675773 | S, A |
| 1 | Average signs | ≥4 | 23 | Co-trimoxazole | 45 | Finafloxacin | 45 | 11.208859 | 1 | 8.140774E-04 | 11.725428 | 1 | 6.165186E-04 | 1.320443 | S, A |
| 1 | Total signs | ≥4 | 24 | Co-trimoxazole | 45 | Finafloxacin | 45 | 12.534257 | 1 | 3.995584E-04 | 11.725428 | 1 | 6.165186E-04 | 0.648088 | S, A |
| 1 | Average signs | ≥4 | 24 | Co-trimoxazole | 45 | Finafloxacin | 45 | 11.352490 | 1 | 7.534688E-04 | 11.725428 | 1 | 6.165186E-04 | 1.222135 | S, A |
| 1 | Total signs | ≥4 | 25 | Co-trimoxazole | 45 | Finafloxacin | 45 | 12.480063 | 1 | 4.113183E-04 | 11.725428 | 1 | 6.165186E-04 | 0.667163 | S, A |
| 1 | Average signs | ≥4 | 25 | Co-trimoxazole | 45 | Finafloxacin | 45 | 11.270750 | 1 | 7.873791E-04 | 11.725428 | 1 | 6.165186E-04 | 1.277138 | S, A |
| 1 | Total signs | ≥4 | 26 | Co-trimoxazole | 45 | Finafloxacin | 45 | 12.551639 | 1 | 3.958589E-04 | 11.725428 | 1 | 6.165186E-04 | 0.642087 | S, A |
| 1 | Average signs | ≥4 | 26 | Co-trimoxazole | 45 | Finafloxacin | 45 | 11.447003 | 1 | 7.160940E-04 | 11.725428 | 1 | 6.165186E-04 | 1.161512 | S, A |
| 1 | Total signs | ≥4 | 27 | Co-trimoxazole | 45 | Finafloxacin | 45 | 15.826109 | 1 | 6.943772E-05 | 11.725428 | 1 | 6.165186E-04 | 0.112629 | S, A |
| 1 | Average signs | ≥4 | 27 | Co-trimoxazole | 45 | Finafloxacin | 45 | 14.125323 | 1 | 1.710258E-04 | 11.725428 | 1 | 6.165186E-04 | 0.277406 | S, A |
| 1 | Total signs | ≥4 | 28 | Co-trimoxazole | 45 | Finafloxacin | 45 | 17.766153 | 1 | 2.497877E-05 | 11.725428 | 1 | 6.165186E-04 | 0.040516 | S, A |
| 1 | Average signs | ≥4 | 28 | Co-trimoxazole | 45 | Finafloxacin | 45 | 16.144333 | 1 | 5.869390E-05 | 11.725428 | 1 | 6.165186E-04 | 0.095202 | S, A |
| 1 | Total signs | ≥4 | 29 | Co-trimoxazole | 45 | Finafloxacin | 45 | 18.032521 | 1 | 2.171633E-05 | 11.725428 | 1 | 6.165186E-04 | 0.035224 | S, A |
| 1 | Average signs | ≥4 | 29 | Co-trimoxazole | 45 | Finafloxacin | 45 | 16.265772 | 1 | 5.504945E-05 | 11.725428 | 1 | 6.165186E-04 | 0.089291 | S, A |
| 1 | Total signs | ≥4 | 30 | Co-trimoxazole | 45 | Finafloxacin | 45 | 18.032521 | 1 | 2.171633E-05 | 11.725428 | 1 | 6.165186E-04 | 0.035224 | S, A |
| 1 | Average signs | ≥4 | 30 | Co-trimoxazole | 45 | Finafloxacin | 45 | 16.309031 | 1 | 5.380689E-05 | 11.725428 | 1 | 6.165186E-04 | 0.087275 | S, A |
| 2 | Total signs | ≥4 | 20 | Finafloxacin | 90 | Diluent Control | 20 | 136.184833 | 1 | 1.817952E-31 | 136.184833 | 1 | 1.817952E-31 | 1.000000 | S, A |
| 2 | Average signs | ≥4 | 20 | Finafloxacin | 90 | Diluent Control | 20 | 136.184833 | 1 | 1.817952E-31 | 136.184833 | 1 | 1.817952E-31 | 1.000000 | S, A |
| 2 | Total signs | ≥4 | 21 | Finafloxacin | 90 | Diluent Control | 20 | 136.184833 | 1 | 1.817952E-31 | 136.184833 | 1 | 1.817952E-31 | 1.000000 | S, A |
| 2 | Average signs | ≥4 | 21 | Finafloxacin | 90 | Diluent Control | 20 | 136.184833 | 1 | 1.817952E-31 | 136.184833 | 1 | 1.817952E-31 | 1.000000 | S, A |
| 2 | Total signs | ≥4 | 22 | Finafloxacin | 90 | Diluent Control | 20 | 136.184833 | 1 | 1.817952E-31 | 136.184833 | 1 | 1.817952E-31 | 1.000000 | S, A |
| 2 | Average signs | ≥4 | 22 | Finafloxacin | 90 | Diluent Control | 20 | 136.184833 | 1 | 1.817952E-31 | 136.184833 | 1 | 1.817952E-31 | 1.000000 | S, A |
| 2 | Total signs | ≥4 | 23 | Finafloxacin | 90 | Diluent Control | 20 | 136.184833 | 1 | 1.817952E-31 | 136.184833 | 1 | 1.817952E-31 | 1.000000 | S, A |
| 2 | Average signs | ≥4 | 23 | Finafloxacin | 90 | Diluent Control | 20 | 136.184833 | 1 | 1.817952E-31 | 136.184833 | 1 | 1.817952E-31 | 1.000000 | S, A |
| 2 | Total signs | ≥4 | 24 | Finafloxacin | 90 | Diluent Control | 20 | 136.184833 | 1 | 1.817952E-31 | 136.184833 | 1 | 1.817952E-31 | 1.000000 | S, A |
| 2 | Average signs | ≥4 | 24 | Finafloxacin | 90 | Diluent Control | 20 | 136.184833 | 1 | 1.817952E-31 | 136.184833 | 1 | 1.817952E-31 | 1.000000 | S, A |
| 2 | Total signs | ≥4 | 25 | Finafloxacin | 90 | Diluent Control | 20 | 136.184833 | 1 | 1.817952E-31 | 136.184833 | 1 | 1.817952E-31 | 1.000000 | S, A |
| 2 | Average signs | ≥4 | 25 | Finafloxacin | 90 | Diluent Control | 20 | 136.184833 | 1 | 1.817952E-31 | 136.184833 | 1 | 1.817952E-31 | 1.000000 | S, A |
| 2 | Total signs | ≥4 | 26 | Finafloxacin | 90 | Diluent Control | 20 | 136.184833 | 1 | 1.817952E-31 | 136.184833 | 1 | 1.817952E-31 | 1.000000 | S, A |
| 2 | Average signs | ≥4 | 26 | Finafloxacin | 90 | Diluent Control | 20 | 136.184833 | 1 | 1.817952E-31 | 136.184833 | 1 | 1.817952E-31 | 1.000000 | S, A |
| 2 | Total signs | ≥4 | 27 | Finafloxacin | 90 | Diluent Control | 20 | 136.184833 | 1 | 1.817952E-31 | 136.184833 | 1 | 1.817952E-31 | 1.000000 | S, A |
| 2 | Average signs | ≥4 | 27 | Finafloxacin | 90 | Diluent Control | 20 | 136.184833 | 1 | 1.817952E-31 | 136.184833 | 1 | 1.817952E-31 | 1.000000 | S, A |
| 2 | Total signs | ≥4 | 28 | Finafloxacin | 90 | Diluent Control | 20 | 136.184833 | 1 | 1.817952E-31 | 136.184833 | 1 | 1.817952E-31 | 1.000000 | S, A |
| 2 | Average signs | ≥4 | 28 | Finafloxacin | 90 | Diluent Control | 20 | 136.184833 | 1 | 1.817952E-31 | 136.184833 | 1 | 1.817952E-31 | 1.000000 | S, A |
| 2 | Total signs | ≥4 | 29 | Finafloxacin | 90 | Diluent Control | 20 | 136.184833 | 1 | 1.817952E-31 | 136.184833 | 1 | 1.817952E-31 | 1.000000 | S, A |
| 2 | Average signs | ≥4 | 29 | Finafloxacin | 90 | Diluent Control | 20 | 136.184833 | 1 | 1.817952E-31 | 136.184833 | 1 | 1.817952E-31 | 1.000000 | S, A |
| 2 | Total signs | ≥4 | 30 | Finafloxacin | 90 | Diluent Control | 20 | 136.184833 | 1 | 1.817952E-31 | 136.184833 | 1 | 1.817952E-31 | 1.000000 | S, A |
| 2 | Average signs | ≥4 | 30 | Finafloxacin | 90 | Diluent Control | 20 | 136.184833 | 1 | 1.817952E-31 | 136.184833 | 1 | 1.817952E-31 | 1.000000 | S, A |
| 3 | Total signs | ≥4 | 20 | Finafloxacin | 40 | Diluent Control | 15 | 65.229390 | 1 | 6.666781E-16 | 65.229390 | 1 | 6.666781E-16 | 1.000000 | S, A |
| 3 | Average signs | ≥4 | 20 | Finafloxacin | 40 | Diluent Control | 15 | 65.229390 | 1 | 6.666781E-16 | 65.229390 | 1 | 6.666781E-16 | 1.000000 | S, A |
| 3 | Total signs | ≥4 | 21 | Finafloxacin | 40 | Diluent Control | 15 | 65.229390 | 1 | 6.666781E-16 | 65.229390 | 1 | 6.666781E-16 | 1.000000 | S, A |
| 3 | Average signs | ≥4 | 21 | Finafloxacin | 40 | Diluent Control | 15 | 65.229390 | 1 | 6.666781E-16 | 65.229390 | 1 | 6.666781E-16 | 1.000000 | S, A |
| 3 | Total signs | ≥4 | 22 | Finafloxacin | 40 | Diluent Control | 15 | 65.229390 | 1 | 6.666781E-16 | 65.229390 | 1 | 6.666781E-16 | 1.000000 | S, A |
| 3 | Average signs | ≥4 | 22 | Finafloxacin | 40 | Diluent Control | 15 | 65.229390 | 1 | 6.666781E-16 | 65.229390 | 1 | 6.666781E-16 | 1.000000 | S, A |
| 3 | Total signs | ≥4 | 23 | Finafloxacin | 40 | Diluent Control | 15 | 65.229390 | 1 | 6.666781E-16 | 65.229390 | 1 | 6.666781E-16 | 1.000000 | S, A |
| 3 | Average signs | ≥4 | 23 | Finafloxacin | 40 | Diluent Control | 15 | 65.229390 | 1 | 6.666781E-16 | 65.229390 | 1 | 6.666781E-16 | 1.000000 | S, A |
| 3 | Total signs | ≥4 | 24 | Finafloxacin | 40 | Diluent Control | 15 | 65.229390 | 1 | 6.666781E-16 | 65.229390 | 1 | 6.666781E-16 | 1.000000 | S, A |
| 3 | Average signs | ≥4 | 24 | Finafloxacin | 40 | Diluent Control | 15 | 65.229390 | 1 | 6.666781E-16 | 65.229390 | 1 | 6.666781E-16 | 1.000000 | S, A |
| 3 | Total signs | ≥4 | 25 | Finafloxacin | 40 | Diluent Control | 15 | 65.229390 | 1 | 6.666781E-16 | 65.229390 | 1 | 6.666781E-16 | 1.000000 | S, A |
| 3 | Average signs | ≥4 | 25 | Finafloxacin | 40 | Diluent Control | 15 | 65.229390 | 1 | 6.666781E-16 | 65.229390 | 1 | 6.666781E-16 | 1.000000 | S, A |
| 3 | Total signs | ≥4 | 26 | Finafloxacin | 40 | Diluent Control | 15 | 65.229390 | 1 | 6.666781E-16 | 65.229390 | 1 | 6.666781E-16 | 1.000000 | S, A |
| 3 | Average signs | ≥4 | 26 | Finafloxacin | 40 | Diluent Control | 15 | 65.229390 | 1 | 6.666781E-16 | 65.229390 | 1 | 6.666781E-16 | 1.000000 | S, A |
| 3 | Total signs | ≥4 | 27 | Finafloxacin | 40 | Diluent Control | 15 | 65.229390 | 1 | 6.666781E-16 | 65.229390 | 1 | 6.666781E-16 | 1.000000 | S, A |
| 3 | Average signs | ≥4 | 27 | Finafloxacin | 40 | Diluent Control | 15 | 65.229390 | 1 | 6.666781E-16 | 65.229390 | 1 | 6.666781E-16 | 1.000000 | S, A |
| 3 | Total signs | ≥4 | 28 | Finafloxacin | 40 | Diluent Control | 15 | 65.229390 | 1 | 6.666781E-16 | 65.229390 | 1 | 6.666781E-16 | 1.000000 | S, A |
| 3 | Average signs | ≥4 | 28 | Finafloxacin | 40 | Diluent Control | 15 | 65.229390 | 1 | 6.666781E-16 | 65.229390 | 1 | 6.666781E-16 | 1.000000 | S, A |
| 3 | Total signs | ≥4 | 29 | Finafloxacin | 40 | Diluent Control | 15 | 65.229390 | 1 | 6.666781E-16 | 65.229390 | 1 | 6.666781E-16 | 1.000000 | S, A |
| 3 | Average signs | ≥4 | 29 | Finafloxacin | 40 | Diluent Control | 15 | 65.229390 | 1 | 6.666781E-16 | 65.229390 | 1 | 6.666781E-16 | 1.000000 | S, A |
| 3 | Total signs | ≥4 | 30 | Finafloxacin | 40 | Diluent Control | 15 | 65.229390 | 1 | 6.666781E-16 | 65.229390 | 1 | 6.666781E-16 | 1.000000 | S, A |
| 3 | Average signs | ≥4 | 30 | Finafloxacin | 40 | Diluent Control | 15 | 65.229390 | 1 | 6.666781E-16 | 65.229390 | 1 | 6.666781E-16 | 1.000000 | S, A |
| 3 | Total signs | ≥4 | 20 | Doxycycline | 40 | Diluent Control | 15 | 65.229390 | 1 | 6.666781E-16 | 65.229390 | 1 | 6.666781E-16 | 1.000000 | S, A |
| 3 | Average signs | ≥4 | 20 | Doxycycline | 40 | Diluent Control | 15 | 65.229390 | 1 | 6.666781E-16 | 65.229390 | 1 | 6.666781E-16 | 1.000000 | S, A |
| 3 | Total signs | ≥4 | 21 | Doxycycline | 40 | Diluent Control | 15 | 65.229390 | 1 | 6.666781E-16 | 65.229390 | 1 | 6.666781E-16 | 1.000000 | S, A |
| 3 | Average signs | ≥4 | 21 | Doxycycline | 40 | Diluent Control | 15 | 65.229390 | 1 | 6.666781E-16 | 65.229390 | 1 | 6.666781E-16 | 1.000000 | S, A |
| 3 | Total signs | ≥4 | 22 | Doxycycline | 40 | Diluent Control | 15 | 65.229390 | 1 | 6.666781E-16 | 65.229390 | 1 | 6.666781E-16 | 1.000000 | S, A |
| 3 | Average signs | ≥4 | 22 | Doxycycline | 40 | Diluent Control | 15 | 65.229390 | 1 | 6.666781E-16 | 65.229390 | 1 | 6.666781E-16 | 1.000000 | S, A |
| 3 | Total signs | ≥4 | 23 | Doxycycline | 40 | Diluent Control | 15 | 65.229390 | 1 | 6.666781E-16 | 65.229390 | 1 | 6.666781E-16 | 1.000000 | S, A |
| 3 | Average signs | ≥4 | 23 | Doxycycline | 40 | Diluent Control | 15 | 65.229390 | 1 | 6.666781E-16 | 65.229390 | 1 | 6.666781E-16 | 1.000000 | S, A |
| 3 | Total signs | ≥4 | 24 | Doxycycline | 40 | Diluent Control | 15 | 65.229390 | 1 | 6.666781E-16 | 65.229390 | 1 | 6.666781E-16 | 1.000000 | S, A |
| 3 | Average signs | ≥4 | 24 | Doxycycline | 40 | Diluent Control | 15 | 65.229390 | 1 | 6.666781E-16 | 65.229390 | 1 | 6.666781E-16 | 1.000000 | S, A |
| 3 | Total signs | ≥4 | 25 | Doxycycline | 40 | Diluent Control | 15 | 65.229390 | 1 | 6.666781E-16 | 65.229390 | 1 | 6.666781E-16 | 1.000000 | S, A |
| 3 | Average signs | ≥4 | 25 | Doxycycline | 40 | Diluent Control | 15 | 65.229390 | 1 | 6.666781E-16 | 65.229390 | 1 | 6.666781E-16 | 1.000000 | S, A |
| 3 | Total signs | ≥4 | 26 | Doxycycline | 40 | Diluent Control | 15 | 65.229390 | 1 | 6.666781E-16 | 65.229390 | 1 | 6.666781E-16 | 1.000000 | S, A |
| 3 | Average signs | ≥4 | 26 | Doxycycline | 40 | Diluent Control | 15 | 65.229390 | 1 | 6.666781E-16 | 65.229390 | 1 | 6.666781E-16 | 1.000000 | S, A |
| 3 | Total signs | ≥4 | 27 | Doxycycline | 40 | Diluent Control | 15 | 65.229390 | 1 | 6.666781E-16 | 65.229390 | 1 | 6.666781E-16 | 1.000000 | S, A |
| 3 | Average signs | ≥4 | 27 | Doxycycline | 40 | Diluent Control | 15 | 65.229390 | 1 | 6.666781E-16 | 65.229390 | 1 | 6.666781E-16 | 1.000000 | S, A |
| 3 | Total signs | ≥4 | 28 | Doxycycline | 40 | Diluent Control | 15 | 65.229390 | 1 | 6.666781E-16 | 65.229390 | 1 | 6.666781E-16 | 1.000000 | S, A |
| 3 | Average signs | ≥4 | 28 | Doxycycline | 40 | Diluent Control | 15 | 65.229390 | 1 | 6.666781E-16 | 65.229390 | 1 | 6.666781E-16 | 1.000000 | S, A |
| 3 | Total signs | ≥4 | 29 | Doxycycline | 40 | Diluent Control | 15 | 65.229390 | 1 | 6.666781E-16 | 65.229390 | 1 | 6.666781E-16 | 1.000000 | S, A |
| 3 | Average signs | ≥4 | 29 | Doxycycline | 40 | Diluent Control | 15 | 65.229390 | 1 | 6.666781E-16 | 65.229390 | 1 | 6.666781E-16 | 1.000000 | S, A |
| 3 | Total signs | ≥4 | 30 | Doxycycline | 40 | Diluent Control | 15 | 65.229390 | 1 | 6.666781E-16 | 65.229390 | 1 | 6.666781E-16 | 1.000000 | S, A |
| 3 | Average signs | ≥4 | 30 | Doxycycline | 40 | Diluent Control | 15 | 65.229390 | 1 | 6.666781E-16 | 65.229390 | 1 | 6.666781E-16 | 1.000000 | S, A |
| 3 | Total signs | ≥4 | 20 | Doxycycline | 40 | Finafloxacin | 40 | 9.483353 | 1 | 2.073447E-03 | 4.326465 | 1 | 3.752411E-02 | 0.055256 | S, A |
| 3 | Average signs | ≥4 | 20 | Doxycycline | 40 | Finafloxacin | 40 | 10.660097 | 1 | 1.094716E-03 | 4.326465 | 1 | 3.752411E-02 | 0.029174 | S, A |
| 3 | Total signs | ≥4 | 21 | Doxycycline | 40 | Finafloxacin | 40 | 7.632681 | 1 | 5.732003E-03 | 4.326465 | 1 | 3.752411E-02 | 0.152755 | S, A |
| 3 | Average signs | ≥4 | 21 | Doxycycline | 40 | Finafloxacin | 40 | 8.907966 | 1 | 2.839293E-03 | 4.326465 | 1 | 3.752411E-02 | 0.075666 | S, A |
| 3 | Total signs | ≥4 | 22 | Doxycycline | 40 | Finafloxacin | 40 | 7.631570 | 1 | 5.735536E-03 | 4.326465 | 1 | 3.752411E-02 | 0.152849 | S, A |
| 3 | Average signs | ≥4 | 22 | Doxycycline | 40 | Finafloxacin | 40 | 9.015947 | 1 | 2.676342E-03 | 4.326465 | 1 | 3.752411E-02 | 0.071323 | S, A |
| 3 | Total signs | ≥4 | 23 | Doxycycline | 40 | Finafloxacin | 40 | 5.745242 | 1 | 1.653337E-02 | 4.326465 | 1 | 3.752411E-02 | 0.440607 | S, A |
| 3 | Average signs | ≥4 | 23 | Doxycycline | 40 | Finafloxacin | 40 | 7.293627 | 1 | 6.919962E-03 | 4.326465 | 1 | 3.752411E-02 | 0.184414 | S, A |
| 3 | Total signs | ≥4 | 24 | Doxycycline | 40 | Finafloxacin | 40 | 5.508883 | 1 | 1.892012E-02 | 4.326465 | 1 | 3.752411E-02 | 0.504213 | S, A |
| 3 | Average signs | ≥4 | 24 | Doxycycline | 40 | Finafloxacin | 40 | 8.242051 | 1 | 4.093085E-03 | 4.326465 | 1 | 3.752411E-02 | 0.109079 | S, A |
| 3 | Total signs | ≥4 | 25 | Doxycycline | 40 | Finafloxacin | 40 | 4.498816 | 1 | 3.391833E-02 | 4.326465 | 1 | 3.752411E-02 | 0.903908 | S, A |
| 3 | Average signs | ≥4 | 25 | Doxycycline | 40 | Finafloxacin | 40 | 7.004438 | 1 | 8.130788E-03 | 4.326465 | 1 | 3.752411E-02 | 0.216682 | S, A |
| 3 | Total signs | ≥4 | 26 | Doxycycline | 40 | Finafloxacin | 40 | 3.531676 | 1 | 6.020692E-02 | 4.326465 | 1 | 3.752411E-02 | 1.604486 | S, Â |
| 3 | Average signs | ≥4 | 26 | Doxycycline | 40 | Finafloxacin | 40 | 5.960815 | 1 | 1.462727E-02 | 4.326465 | 1 | 3.752411E-02 | 0.389810 | S, A |
| 3 | Total signs | ≥4 | 27 | Doxycycline | 40 | Finafloxacin | 40 | 3.607203 | 1 | 5.752980E-02 | 4.326465 | 1 | 3.752411E-02 | 1.533142 | S, Â |
| 3 | Average signs | ≥4 | 27 | Doxycycline | 40 | Finafloxacin | 40 | 6.670349 | 1 | 9.803001E-03 | 4.326465 | 1 | 3.752411E-02 | 0.261245 | S, A |
| 3 | Total signs | ≥4 | 28 | Doxycycline | 40 | Finafloxacin | 40 | 4.636214 | 1 | 3.130398E-02 | 4.326465 | 1 | 3.752411E-02 | 0.834237 | S, A |
| 3 | Average signs | ≥4 | 28 | Doxycycline | 40 | Finafloxacin | 40 | 8.717642 | 1 | 3.151454E-03 | 4.326465 | 1 | 3.752411E-02 | 0.083985 | S, A |
| 3 | Total signs | ≥4 | 29 | Doxycycline | 40 | Finafloxacin | 40 | 4.668787 | 1 | 3.071561E-02 | 4.326465 | 1 | 3.752411E-02 | 0.818557 | S, A |
| 3 | Average signs | ≥4 | 29 | Doxycycline | 40 | Finafloxacin | 40 | 8.717642 | 1 | 3.151454E-03 | 4.326465 | 1 | 3.752411E-02 | 0.083985 | S, A |
| 3 | Total signs | ≥4 | 30 | Doxycycline | 40 | Finafloxacin | 40 | 4.668787 | 1 | 3.071561E-02 | 4.326465 | 1 | 3.752411E-02 | 0.818557 | S, A |
| 3 | Average signs | ≥4 | 30 | Doxycycline | 40 | Finafloxacin | 40 | 8.717642 | 1 | 3.151454E-03 | 4.326465 | 1 | 3.752411E-02 | 0.083985 | S, A |
| 3 | Total signs | ≥4 | 20 | Finafloxacin & Doxycycline | 40 | Diluent Control | 15 | 46.872846 | 1 | 7.574496E-12 | 46.872846 | 1 | 7.574496E-12 | 1.000000 | S, A |
| 3 | Average signs | ≥4 | 20 | Finafloxacin & Doxycycline | 40 | Diluent Control | 15 | 46.872846 | 1 | 7.574496E-12 | 46.872846 | 1 | 7.574496E-12 | 1.000000 | S, A |
| 3 | Total signs | ≥4 | 21 | Finafloxacin & Doxycycline | 40 | Diluent Control | 15 | 46.872846 | 1 | 7.574496E-12 | 46.872846 | 1 | 7.574496E-12 | 1.000000 | S, A |
| 3 | Average signs | ≥4 | 21 | Finafloxacin & Doxycycline | 40 | Diluent Control | 15 | 46.872846 | 1 | 7.574496E-12 | 46.872846 | 1 | 7.574496E-12 | 1.000000 | S, A |
| 3 | Total signs | ≥4 | 22 | Finafloxacin & Doxycycline | 40 | Diluent Control | 15 | 46.872846 | 1 | 7.574496E-12 | 46.872846 | 1 | 7.574496E-12 | 1.000000 | S, A |
| 3 | Average signs | ≥4 | 22 | Finafloxacin & Doxycycline | 40 | Diluent Control | 15 | 46.872846 | 1 | 7.574496E-12 | 46.872846 | 1 | 7.574496E-12 | 1.000000 | S, A |
| 3 | Total signs | ≥4 | 23 | Finafloxacin & Doxycycline | 40 | Diluent Control | 15 | 46.872846 | 1 | 7.574496E-12 | 46.872846 | 1 | 7.574496E-12 | 1.000000 | S, A |
| 3 | Average signs | ≥4 | 23 | Finafloxacin & Doxycycline | 40 | Diluent Control | 15 | 46.872846 | 1 | 7.574496E-12 | 46.872846 | 1 | 7.574496E-12 | 1.000000 | S, A |
| 3 | Total signs | ≥4 | 24 | Finafloxacin & Doxycycline | 40 | Diluent Control | 15 | 46.872846 | 1 | 7.574496E-12 | 46.872846 | 1 | 7.574496E-12 | 1.000000 | S, A |
| 3 | Average signs | ≥4 | 24 | Finafloxacin & Doxycycline | 40 | Diluent Control | 15 | 46.872846 | 1 | 7.574496E-12 | 46.872846 | 1 | 7.574496E-12 | 1.000000 | S, A |
| 3 | Total signs | ≥4 | 25 | Finafloxacin & Doxycycline | 40 | Diluent Control | 15 | 46.872846 | 1 | 7.574496E-12 | 46.872846 | 1 | 7.574496E-12 | 1.000000 | S, A |
| 3 | Average signs | ≥4 | 25 | Finafloxacin & Doxycycline | 40 | Diluent Control | 15 | 46.872846 | 1 | 7.574496E-12 | 46.872846 | 1 | 7.574496E-12 | 1.000000 | S, A |
| 3 | Total signs | ≥4 | 26 | Finafloxacin & Doxycycline | 40 | Diluent Control | 15 | 46.872846 | 1 | 7.574496E-12 | 46.872846 | 1 | 7.574496E-12 | 1.000000 | S, A |
| 3 | Average signs | ≥4 | 26 | Finafloxacin & Doxycycline | 40 | Diluent Control | 15 | 46.872846 | 1 | 7.574496E-12 | 46.872846 | 1 | 7.574496E-12 | 1.000000 | S, A |
| 3 | Total signs | ≥4 | 27 | Finafloxacin & Doxycycline | 40 | Diluent Control | 15 | 46.872846 | 1 | 7.574496E-12 | 46.872846 | 1 | 7.574496E-12 | 1.000000 | S, A |
| 3 | Average signs | ≥4 | 27 | Finafloxacin & Doxycycline | 40 | Diluent Control | 15 | 46.872846 | 1 | 7.574496E-12 | 46.872846 | 1 | 7.574496E-12 | 1.000000 | S, A |
| 3 | Total signs | ≥4 | 28 | Finafloxacin & Doxycycline | 40 | Diluent Control | 15 | 46.872846 | 1 | 7.574496E-12 | 46.872846 | 1 | 7.574496E-12 | 1.000000 | S, A |
| 3 | Average signs | ≥4 | 28 | Finafloxacin & Doxycycline | 40 | Diluent Control | 15 | 46.872846 | 1 | 7.574496E-12 | 46.872846 | 1 | 7.574496E-12 | 1.000000 | S, A |
| 3 | Total signs | ≥4 | 29 | Finafloxacin & Doxycycline | 40 | Diluent Control | 15 | 46.872846 | 1 | 7.574496E-12 | 46.872846 | 1 | 7.574496E-12 | 1.000000 | S, A |
| 3 | Average signs | ≥4 | 29 | Finafloxacin & Doxycycline | 40 | Diluent Control | 15 | 46.872846 | 1 | 7.574496E-12 | 46.872846 | 1 | 7.574496E-12 | 1.000000 | S, A |
| 3 | Total signs | ≥4 | 30 | Finafloxacin & Doxycycline | 40 | Diluent Control | 15 | 46.872846 | 1 | 7.574496E-12 | 46.872846 | 1 | 7.574496E-12 | 1.000000 | S, A |
| 3 | Average signs | ≥4 | 30 | Finafloxacin & Doxycycline | 40 | Diluent Control | 15 | 46.872846 | 1 | 7.574496E-12 | 46.872846 | 1 | 7.574496E-12 | 1.000000 | S, A |
| 3 | Total signs | ≥4 | 20 | Finafloxacin & Doxycycline | 40 | Finafloxacin | 40 | 0.003300 | 1 | 9.541903E-01 | 0.709539 | 1 | 3.995968E-01 | 2.387883 | Ŝ, Â |
| 3 | Average signs | ≥4 | 20 | Finafloxacin & Doxycycline | 40 | Finafloxacin | 40 | 1.010082 | 1 | 3.148832E-01 | 0.709539 | 1 | 3.995968E-01 | 0.788002 | Ŝ, Â |
| 3 | Total signs | ≥4 | 21 | Finafloxacin & Doxycycline | 40 | Finafloxacin | 40 | 0.002704 | 1 | 9.585305E-01 | 0.709539 | 1 | 3.995968E-01 | 2.398744 | Ŝ, Â |
| 3 | Average signs | ≥4 | 21 | Finafloxacin & Doxycycline | 40 | Finafloxacin | 40 | 1.022745 | 1 | 3.118688E-01 | 0.709539 | 1 | 3.995968E-01 | 0.780459 | Ŝ, Â |
| 3 | Total signs | ≥4 | 22 | Finafloxacin & Doxycycline | 40 | Finafloxacin | 40 | 0.003391 | 1 | 9.535607E-01 | 0.709539 | 1 | 3.995968E-01 | 2.386307 | Ŝ, Â |
| 3 | Average signs | ≥4 | 22 | Finafloxacin & Doxycycline | 40 | Finafloxacin | 40 | 1.004097 | 1 | 3.163213E-01 | 0.709539 | 1 | 3.995968E-01 | 0.791601 | Ŝ, Â |
| 3 | Total signs | ≥4 | 23 | Finafloxacin & Doxycycline | 40 | Finafloxacin | 40 | 0.108691 | 1 | 7.416395E-01 | 0.709539 | 1 | 3.995968E-01 | 1.855970 | Ŝ, Â |
| 3 | Average signs | ≥4 | 23 | Finafloxacin & Doxycycline | 40 | Finafloxacin | 40 | 0.543344 | 1 | 4.610503E-01 | 0.709539 | 1 | 3.995968E-01 | 1.153789 | Ŝ, Â |
| 3 | Total signs | ≥4 | 24 | Finafloxacin & Doxycycline | 40 | Finafloxacin | 40 | 0.108691 | 1 | 7.416395E-01 | 0.709539 | 1 | 3.995968E-01 | 1.855970 | Ŝ, Â |
| 3 | Average signs | ≥4 | 24 | Finafloxacin & Doxycycline | 40 | Finafloxacin | 40 | 1.087494 | 1 | 2.970271E-01 | 0.709539 | 1 | 3.995968E-01 | 0.743317 | Ŝ, Â |
| 3 | Total signs | ≥4 | 25 | Finafloxacin & Doxycycline | 40 | Finafloxacin | 40 | 0.105175 | 1 | 7.457058E-01 | 0.709539 | 1 | 3.995968E-01 | 1.866146 | Ŝ, Â |
| 3 | Average signs | ≥4 | 25 | Finafloxacin & Doxycycline | 40 | Finafloxacin | 40 | 1.101193 | 1 | 2.940044E-01 | 0.709539 | 1 | 3.995968E-01 | 0.735753 | Ŝ, Â |
| 3 | Total signs | ≥4 | 26 | Finafloxacin & Doxycycline | 40 | Finafloxacin | 40 | 0.462663 | 1 | 4.963822E-01 | 0.709539 | 1 | 3.995968E-01 | 1.242208 | Ŝ, Â |
| 3 | Average signs | ≥4 | 26 | Finafloxacin & Doxycycline | 40 | Finafloxacin | 40 | 0.527210 | 1 | 4.677824E-01 | 0.709539 | 1 | 3.995968E-01 | 1.170636 | Ŝ, Â |
| 3 | Total signs | ≥4 | 27 | Finafloxacin & Doxycycline | 40 | Finafloxacin | 40 | 0.460369 | 1 | 4.974516E-01 | 0.709539 | 1 | 3.995968E-01 | 1.244884 | Ŝ, Â |
| 3 | Average signs | ≥4 | 27 | Finafloxacin & Doxycycline | 40 | Finafloxacin | 40 | 1.142105 | 1 | 2.852081E-01 | 0.709539 | 1 | 3.995968E-01 | 0.713740 | Ŝ, Â |
| 3 | Total signs | ≥4 | 28 | Finafloxacin & Doxycycline | 40 | Finafloxacin | 40 | 0.629157 | 1 | 4.276646E-01 | 0.709539 | 1 | 3.995968E-01 | 1.070240 | Ŝ, Â |
| 3 | Average signs | ≥4 | 28 | Finafloxacin & Doxycycline | 40 | Finafloxacin | 40 | 1.403252 | 1 | 2.361798E-01 | 0.709539 | 1 | 3.995968E-01 | 0.591045 | Ŝ, Â |
| 3 | Total signs | ≥4 | 29 | Finafloxacin & Doxycycline | 40 | Finafloxacin | 40 | 0.629157 | 1 | 4.276646E-01 | 0.709539 | 1 | 3.995968E-01 | 1.070240 | Ŝ, Â |
| 3 | Average signs | ≥4 | 29 | Finafloxacin & Doxycycline | 40 | Finafloxacin | 40 | 1.403252 | 1 | 2.361798E-01 | 0.709539 | 1 | 3.995968E-01 | 0.591045 | Ŝ, Â |
| 3 | Total signs | ≥4 | 30 | Finafloxacin & Doxycycline | 40 | Finafloxacin | 40 | 1.299280 | 1 | 2.543448E-01 | 0.709539 | 1 | 3.995968E-01 | 0.636504 | Ŝ, Â |
| 3 | Average signs | ≥4 | 30 | Finafloxacin & Doxycycline | 40 | Finafloxacin | 40 | 0.709539 | 1 | 3.995968E-01 | 0.709539 | 1 | 3.995968E-01 | 1.000000 | Ŝ, Â |
| 3 | Total signs | ≥4 | 20 | Finafloxacin & Doxycycline | 40 | Doxycycline | 40 | 7.964539 | 1 | 4.770265E-03 | 1.597411 | 1 | 2.062705E-01 | 0.023126 | Ŝ, A |
| 3 | Average signs | ≥4 | 20 | Finafloxacin & Doxycycline | 40 | Doxycycline | 40 | 4.967326 | 1 | 2.583055E-02 | 1.597411 | 1 | 2.062705E-01 | 0.125227 | Ŝ, A |
| 3 | Total signs | ≥4 | 21 | Finafloxacin & Doxycycline | 40 | Doxycycline | 40 | 6.601857 | 1 | 1.018725E-02 | 1.597411 | 1 | 2.062705E-01 | 0.049388 | Ŝ, A |
| 3 | Average signs | ≥4 | 21 | Finafloxacin & Doxycycline | 40 | Doxycycline | 40 | 3.875748 | 1 | 4.898847E-02 | 1.597411 | 1 | 2.062705E-01 | 0.237496 | Ŝ, A |
| 3 | Total signs | ≥4 | 22 | Finafloxacin & Doxycycline | 40 | Doxycycline | 40 | 6.626810 | 1 | 1.004550E-02 | 1.597411 | 1 | 2.062705E-01 | 0.048701 | Ŝ, A |
| 3 | Average signs | ≥4 | 22 | Finafloxacin & Doxycycline | 40 | Doxycycline | 40 | 3.846422 | 1 | 4.985222E-02 | 1.597411 | 1 | 2.062705E-01 | 0.241684 | Ŝ, A |
| 3 | Total signs | ≥4 | 23 | Finafloxacin & Doxycycline | 40 | Doxycycline | 40 | 6.182532 | 1 | 1.290176E-02 | 1.597411 | 1 | 2.062705E-01 | 0.062548 | Ŝ, A |
| 3 | Average signs | ≥4 | 23 | Finafloxacin & Doxycycline | 40 | Doxycycline | 40 | 3.380340 | 1 | 6.597843E-02 | 1.597411 | 1 | 2.062705E-01 | 0.319864 | Ŝ, Â |
| 3 | Total signs | ≥4 | 24 | Finafloxacin & Doxycycline | 40 | Doxycycline | 40 | 6.070729 | 1 | 1.374402E-02 | 1.597411 | 1 | 2.062705E-01 | 0.066631 | Ŝ, A |
| 3 | Average signs | ≥4 | 24 | Finafloxacin & Doxycycline | 40 | Doxycycline | 40 | 3.422159 | 1 | 6.432685E-02 | 1.597411 | 1 | 2.062705E-01 | 0.311857 | Ŝ, Â |
| 3 | Total signs | ≥4 | 25 | Finafloxacin & Doxycycline | 40 | Doxycycline | 40 | 5.002186 | 1 | 2.531533E-02 | 1.597411 | 1 | 2.062705E-01 | 0.122729 | Ŝ, A |
| 3 | Average signs | ≥4 | 25 | Finafloxacin & Doxycycline | 40 | Doxycycline | 40 | 2.573119 | 1 | 1.086932E-01 | 1.597411 | 1 | 2.062705E-01 | 0.526945 | Ŝ, Â |
| 3 | Total signs | ≥4 | 26 | Finafloxacin & Doxycycline | 40 | Doxycycline | 40 | 5.779964 | 1 | 1.620987E-02 | 1.597411 | 1 | 2.062705E-01 | 0.078586 | Ŝ, A |
| 3 | Average signs | ≥4 | 26 | Finafloxacin & Doxycycline | 40 | Doxycycline | 40 | 3.083789 | 1 | 7.907611E-02 | 1.597411 | 1 | 2.062705E-01 | 0.383361 | Ŝ, Â |
| 3 | Total signs | ≥4 | 27 | Finafloxacin & Doxycycline | 40 | Doxycycline | 40 | 5.733638 | 1 | 1.664297E-02 | 1.597411 | 1 | 2.062705E-01 | 0.080685 | Ŝ, A |
| 3 | Average signs | ≥4 | 27 | Finafloxacin & Doxycycline | 40 | Doxycycline | 40 | 2.390110 | 1 | 1.221051E-01 | 1.597411 | 1 | 2.062705E-01 | 0.591966 | Ŝ, Â |
| 3 | Total signs | ≥4 | 28 | Finafloxacin & Doxycycline | 40 | Doxycycline | 40 | 7.072762 | 1 | 7.826453E-03 | 1.597411 | 1 | 2.062705E-01 | 0.037943 | Ŝ, A |
| 3 | Average signs | ≥4 | 28 | Finafloxacin & Doxycycline | 40 | Doxycycline | 40 | 3.537868 | 1 | 5.998252E-02 | 1.597411 | 1 | 2.062705E-01 | 0.290795 | Ŝ, Â |
| 3 | Total signs | ≥4 | 29 | Finafloxacin & Doxycycline | 40 | Doxycycline | 40 | 7.156020 | 1 | 7.471280E-03 | 1.597411 | 1 | 2.062705E-01 | 0.036221 | Ŝ, A |
| 3 | Average signs | ≥4 | 29 | Finafloxacin & Doxycycline | 40 | Doxycycline | 40 | 3.537868 | 1 | 5.998252E-02 | 1.597411 | 1 | 2.062705E-01 | 0.290795 | Ŝ, Â |
| 3 | Total signs | ≥4 | 30 | Finafloxacin & Doxycycline | 40 | Doxycycline | 40 | 9.071851 | 1 | 2.595741E-03 | 1.597411 | 1 | 2.062705E-01 | 0.012584 | Ŝ, A |
| 3 | Average signs | ≥4 | 30 | Finafloxacin & Doxycycline | 40 | Doxycycline | 40 | 4.914739 | 1 | 2.662849E-02 | 1.597411 | 1 | 2.062705E-01 | 0.129095 | Ŝ, A |
| 4 | Total signs | ≥4 | 20 | Finafloxacin 36 h | 45 | Finafloxacin 48 h | 44 | 0.603397 | 1 | 4.372850E-01 | 1.730962 | 1 | 1.882881E-01 | 2.322426 | Ŝ, Â |
| 4 | Average signs | ≥4 | 20 | Finafloxacin 36 h | 45 | Finafloxacin 48 h | 44 | 0.368793 | 1 | 5.436628E-01 | 1.730962 | 1 | 1.882881E-01 | 2.887399 | Ŝ, Â |
| 4 | Total signs | ≥4 | 21 | Finafloxacin 36 h | 45 | Finafloxacin 48 h | 44 | 0.555921 | 1 | 4.559084E-01 | 1.730962 | 1 | 1.882881E-01 | 2.421335 | Ŝ, Â |
| 4 | Average signs | ≥4 | 21 | Finafloxacin 36 h | 45 | Finafloxacin 48 h | 44 | 0.315356 | 1 | 5.744122E-01 | 1.730962 | 1 | 1.882881E-01 | 3.050709 | Ŝ, Â |
| 4 | Total signs | ≥4 | 22 | Finafloxacin 36 h | 45 | Finafloxacin 48 h | 44 | 0.548547 | 1 | 4.589122E-01 | 1.730962 | 1 | 1.882881E-01 | 2.437288 | Ŝ, Â |
| 4 | Average signs | ≥4 | 22 | Finafloxacin 36 h | 45 | Finafloxacin 48 h | 44 | 0.293546 | 1 | 5.879570E-01 | 1.730962 | 1 | 1.882881E-01 | 3.122646 | Ŝ, Â |
| 4 | Total signs | ≥4 | 23 | Finafloxacin 36 h | 45 | Finafloxacin 48 h | 44 | 0.477207 | 1 | 4.896902E-01 | 1.730962 | 1 | 1.882881E-01 | 2.600750 | Ŝ, Â |
| 4 | Average signs | ≥4 | 23 | Finafloxacin 36 h | 45 | Finafloxacin 48 h | 44 | 0.200502 | 1 | 6.543157E-01 | 1.730962 | 1 | 1.882881E-01 | 3.475078 | Ŝ, Â |
| 4 | Total signs | ≥4 | 24 | Finafloxacin 36 h | 45 | Finafloxacin 48 h | 44 | 0.613668 | 1 | 4.334100E-01 | 1.730962 | 1 | 1.882881E-01 | 2.301845 | Ŝ, Â |
| 4 | Average signs | ≥4 | 24 | Finafloxacin 36 h | 45 | Finafloxacin 48 h | 44 | 0.321153 | 1 | 5.709154E-01 | 1.730962 | 1 | 1.882881E-01 | 3.032138 | Ŝ, Â |
| 4 | Total signs | ≥4 | 25 | Finafloxacin 36 h | 45 | Finafloxacin 48 h | 44 | 0.597833 | 1 | 4.394058E-01 | 1.730962 | 1 | 1.882881E-01 | 2.333689 | Ŝ, Â |
| 4 | Average signs | ≥4 | 25 | Finafloxacin 36 h | 45 | Finafloxacin 48 h | 44 | 0.443322 | 1 | 5.055235E-01 | 1.730962 | 1 | 1.882881E-01 | 2.684841 | Ŝ, Â |
| 4 | Total signs | ≥4 | 26 | Finafloxacin 36 h | 45 | Finafloxacin 48 h | 44 | 0.563199 | 1 | 4.529741E-01 | 1.730962 | 1 | 1.882881E-01 | 2.405750 | Ŝ, Â |
| 4 | Average signs | ≥4 | 26 | Finafloxacin 36 h | 45 | Finafloxacin 48 h | 44 | 0.436839 | 1 | 5.086519E-01 | 1.730962 | 1 | 1.882881E-01 | 2.701456 | Ŝ, Â |
| 4 | Total signs | ≥4 | 27 | Finafloxacin 36 h | 45 | Finafloxacin 48 h | 44 | 0.557852 | 1 | 4.551272E-01 | 1.730962 | 1 | 1.882881E-01 | 2.417185 | Ŝ, Â |
| 4 | Average signs | ≥4 | 27 | Finafloxacin 36 h | 45 | Finafloxacin 48 h | 44 | 0.390001 | 1 | 5.322990E-01 | 1.730962 | 1 | 1.882881E-01 | 2.827046 | Ŝ, Â |
| 4 | Total signs | ≥4 | 28 | Finafloxacin 36 h | 45 | Finafloxacin 48 h | 44 | 0.536830 | 1 | 4.637495E-01 | 1.730962 | 1 | 1.882881E-01 | 2.462979 | Ŝ, Â |
| 4 | Average signs | ≥4 | 28 | Finafloxacin 36 h | 45 | Finafloxacin 48 h | 44 | 0.384296 | 1 | 5.353132E-01 | 1.730962 | 1 | 1.882881E-01 | 2.843054 | Ŝ, Â |
| 4 | Total signs | ≥4 | 29 | Finafloxacin 36 h | 45 | Finafloxacin 48 h | 44 | 0.531705 | 1 | 4.658908E-01 | 1.730962 | 1 | 1.882881E-01 | 2.474351 | Ŝ, Â |
| 4 | Average signs | ≥4 | 29 | Finafloxacin 36 h | 45 | Finafloxacin 48 h | 44 | 0.359861 | 1 | 5.485835E-01 | 1.730962 | 1 | 1.882881E-01 | 2.913533 | Ŝ, Â |
| 4 | Total signs | ≥4 | 30 | Finafloxacin 36 h | 45 | Finafloxacin 48 h | 44 | 0.531705 | 1 | 4.658908E-01 | 1.730962 | 1 | 1.882881E-01 | 2.474351 | Ŝ, Â |
| 4 | Average signs | ≥4 | 30 | Finafloxacin 36 h | 45 | Finafloxacin 48 h | 44 | 0.317577 | 1 | 5.730673E-01 | 1.730962 | 1 | 1.882881E-01 | 3.043567 | Ŝ, Â |
| 4 | Total signs | ≥4 | 20 | Finafloxacin 36 h | 45 | Diluent Control | 88 | 94.766888 | 1 | 2.141784E-22 | 94.766888 | 1 | 2.141784E-22 | 1.000000 | S, A |
| 4 | Average signs | ≥4 | 20 | Finafloxacin 36 h | 45 | Diluent Control | 88 | 94.766888 | 1 | 2.141784E-22 | 94.766888 | 1 | 2.141784E-22 | 1.000000 | S, A |
| 4 | Total signs | ≥4 | 21 | Finafloxacin 36 h | 45 | Diluent Control | 88 | 94.766888 | 1 | 2.141784E-22 | 94.766888 | 1 | 2.141784E-22 | 1.000000 | S, A |
| 4 | Average signs | ≥4 | 21 | Finafloxacin 36 h | 45 | Diluent Control | 88 | 94.766888 | 1 | 2.141784E-22 | 94.766888 | 1 | 2.141784E-22 | 1.000000 | S, A |
| 4 | Total signs | ≥4 | 22 | Finafloxacin 36 h | 45 | Diluent Control | 88 | 94.766888 | 1 | 2.141784E-22 | 94.766888 | 1 | 2.141784E-22 | 1.000000 | S, A |
| 4 | Average signs | ≥4 | 22 | Finafloxacin 36 h | 45 | Diluent Control | 88 | 94.766888 | 1 | 2.141784E-22 | 94.766888 | 1 | 2.141784E-22 | 1.000000 | S, A |
| 4 | Total signs | ≥4 | 23 | Finafloxacin 36 h | 45 | Diluent Control | 88 | 94.766888 | 1 | 2.141784E-22 | 94.766888 | 1 | 2.141784E-22 | 1.000000 | S, A |
| 4 | Average signs | ≥4 | 23 | Finafloxacin 36 h | 45 | Diluent Control | 88 | 94.766888 | 1 | 2.141784E-22 | 94.766888 | 1 | 2.141784E-22 | 1.000000 | S, A |
| 4 | Total signs | ≥4 | 24 | Finafloxacin 36 h | 45 | Diluent Control | 88 | 94.766888 | 1 | 2.141784E-22 | 94.766888 | 1 | 2.141784E-22 | 1.000000 | S, A |
| 4 | Average signs | ≥4 | 24 | Finafloxacin 36 h | 45 | Diluent Control | 88 | 94.766888 | 1 | 2.141784E-22 | 94.766888 | 1 | 2.141784E-22 | 1.000000 | S, A |
| 4 | Total signs | ≥4 | 25 | Finafloxacin 36 h | 45 | Diluent Control | 88 | 94.766888 | 1 | 2.141784E-22 | 94.766888 | 1 | 2.141784E-22 | 1.000000 | S, A |
| 4 | Average signs | ≥4 | 25 | Finafloxacin 36 h | 45 | Diluent Control | 88 | 94.766888 | 1 | 2.141784E-22 | 94.766888 | 1 | 2.141784E-22 | 1.000000 | S, A |
| 4 | Total signs | ≥4 | 26 | Finafloxacin 36 h | 45 | Diluent Control | 88 | 94.766888 | 1 | 2.141784E-22 | 94.766888 | 1 | 2.141784E-22 | 1.000000 | S, A |
| 4 | Average signs | ≥4 | 26 | Finafloxacin 36 h | 45 | Diluent Control | 88 | 94.766888 | 1 | 2.141784E-22 | 94.766888 | 1 | 2.141784E-22 | 1.000000 | S, A |
| 4 | Total signs | ≥4 | 27 | Finafloxacin 36 h | 45 | Diluent Control | 88 | 94.766888 | 1 | 2.141784E-22 | 94.766888 | 1 | 2.141784E-22 | 1.000000 | S, A |
| 4 | Average signs | ≥4 | 27 | Finafloxacin 36 h | 45 | Diluent Control | 88 | 94.766888 | 1 | 2.141784E-22 | 94.766888 | 1 | 2.141784E-22 | 1.000000 | S, A |
| 4 | Total signs | ≥4 | 28 | Finafloxacin 36 h | 45 | Diluent Control | 88 | 94.766888 | 1 | 2.141784E-22 | 94.766888 | 1 | 2.141784E-22 | 1.000000 | S, A |
| 4 | Average signs | ≥4 | 28 | Finafloxacin 36 h | 45 | Diluent Control | 88 | 94.766888 | 1 | 2.141784E-22 | 94.766888 | 1 | 2.141784E-22 | 1.000000 | S, A |
| 4 | Total signs | ≥4 | 29 | Finafloxacin 36 h | 45 | Diluent Control | 88 | 94.766888 | 1 | 2.141784E-22 | 94.766888 | 1 | 2.141784E-22 | 1.000000 | S, A |
| 4 | Average signs | ≥4 | 29 | Finafloxacin 36 h | 45 | Diluent Control | 88 | 94.766888 | 1 | 2.141784E-22 | 94.766888 | 1 | 2.141784E-22 | 1.000000 | S, A |
| 4 | Total signs | ≥4 | 30 | Finafloxacin 36 h | 45 | Diluent Control | 88 | 94.766888 | 1 | 2.141784E-22 | 94.766888 | 1 | 2.141784E-22 | 1.000000 | S, A |
| 4 | Average signs | ≥4 | 30 | Finafloxacin 36 h | 45 | Diluent Control | 88 | 94.766888 | 1 | 2.141784E-22 | 94.766888 | 1 | 2.141784E-22 | 1.000000 | S, A |
| 4 | Total signs | ≥4 | 20 | Finafloxacin 48 h | 44 | Diluent Control | 88 | 72.966845 | 1 | 1.318462E-17 | 72.966845 | 1 | 1.318462E-17 | 1.000000 | S, A |
| 4 | Average signs | ≥4 | 20 | Finafloxacin 48 h | 44 | Diluent Control | 88 | 72.966845 | 1 | 1.318462E-17 | 72.966845 | 1 | 1.318462E-17 | 1.000000 | S, A |
| 4 | Total signs | ≥4 | 21 | Finafloxacin 48 h | 44 | Diluent Control | 88 | 72.966845 | 1 | 1.318462E-17 | 72.966845 | 1 | 1.318462E-17 | 1.000000 | S, A |
| 4 | Average signs | ≥4 | 21 | Finafloxacin 48 h | 44 | Diluent Control | 88 | 72.966845 | 1 | 1.318462E-17 | 72.966845 | 1 | 1.318462E-17 | 1.000000 | S, A |
| 4 | Total signs | ≥4 | 22 | Finafloxacin 48 h | 44 | Diluent Control | 88 | 72.966845 | 1 | 1.318462E-17 | 72.966845 | 1 | 1.318462E-17 | 1.000000 | S, A |
| 4 | Average signs | ≥4 | 22 | Finafloxacin 48 h | 44 | Diluent Control | 88 | 72.966845 | 1 | 1.318462E-17 | 72.966845 | 1 | 1.318462E-17 | 1.000000 | S, A |
| 4 | Total signs | ≥4 | 23 | Finafloxacin 48 h | 44 | Diluent Control | 88 | 72.966845 | 1 | 1.318462E-17 | 72.966845 | 1 | 1.318462E-17 | 1.000000 | S, A |
| 4 | Average signs | ≥4 | 23 | Finafloxacin 48 h | 44 | Diluent Control | 88 | 72.966845 | 1 | 1.318462E-17 | 72.966845 | 1 | 1.318462E-17 | 1.000000 | S, A |
| 4 | Total signs | ≥4 | 24 | Finafloxacin 48 h | 44 | Diluent Control | 88 | 72.966845 | 1 | 1.318462E-17 | 72.966845 | 1 | 1.318462E-17 | 1.000000 | S, A |
| 4 | Average signs | ≥4 | 24 | Finafloxacin 48 h | 44 | Diluent Control | 88 | 72.966845 | 1 | 1.318462E-17 | 72.966845 | 1 | 1.318462E-17 | 1.000000 | S, A |
| 4 | Total signs | ≥4 | 25 | Finafloxacin 48 h | 44 | Diluent Control | 88 | 72.966845 | 1 | 1.318462E-17 | 72.966845 | 1 | 1.318462E-17 | 1.000000 | S, A |
| 4 | Average signs | ≥4 | 25 | Finafloxacin 48 h | 44 | Diluent Control | 88 | 72.966845 | 1 | 1.318462E-17 | 72.966845 | 1 | 1.318462E-17 | 1.000000 | S, A |
| 4 | Total signs | ≥4 | 26 | Finafloxacin 48 h | 44 | Diluent Control | 88 | 72.966845 | 1 | 1.318462E-17 | 72.966845 | 1 | 1.318462E-17 | 1.000000 | S, A |
| 4 | Average signs | ≥4 | 26 | Finafloxacin 48 h | 44 | Diluent Control | 88 | 72.966845 | 1 | 1.318462E-17 | 72.966845 | 1 | 1.318462E-17 | 1.000000 | S, A |
| 4 | Total signs | ≥4 | 27 | Finafloxacin 48 h | 44 | Diluent Control | 88 | 72.966845 | 1 | 1.318462E-17 | 72.966845 | 1 | 1.318462E-17 | 1.000000 | S, A |
| 4 | Average signs | ≥4 | 27 | Finafloxacin 48 h | 44 | Diluent Control | 88 | 72.966845 | 1 | 1.318462E-17 | 72.966845 | 1 | 1.318462E-17 | 1.000000 | S, A |
| 4 | Total signs | ≥4 | 28 | Finafloxacin 48 h | 44 | Diluent Control | 88 | 72.966845 | 1 | 1.318462E-17 | 72.966845 | 1 | 1.318462E-17 | 1.000000 | S, A |
| 4 | Average signs | ≥4 | 28 | Finafloxacin 48 h | 44 | Diluent Control | 88 | 72.966845 | 1 | 1.318462E-17 | 72.966845 | 1 | 1.318462E-17 | 1.000000 | S, A |
| 4 | Total signs | ≥4 | 29 | Finafloxacin 48 h | 44 | Diluent Control | 88 | 72.966845 | 1 | 1.318462E-17 | 72.966845 | 1 | 1.318462E-17 | 1.000000 | S, A |
| 4 | Average signs | ≥4 | 29 | Finafloxacin 48 h | 44 | Diluent Control | 88 | 72.966845 | 1 | 1.318462E-17 | 72.966845 | 1 | 1.318462E-17 | 1.000000 | S, A |
| 4 | Total signs | ≥4 | 30 | Finafloxacin 48 h | 44 | Diluent Control | 88 | 72.966845 | 1 | 1.318462E-17 | 72.966845 | 1 | 1.318462E-17 | 1.000000 | S, A |
| 4 | Average signs | ≥4 | 30 | Finafloxacin 48 h | 44 | Diluent Control | 88 | 72.966845 | 1 | 1.318462E-17 | 72.966845 | 1 | 1.318462E-17 | 1.000000 | S, A |
| 1 | Total signs | ≥5 | 20 | Finafloxacin | 45 | Diluent Control | 15 | 83.192904 | 1 | 7.442441E-20 | 83.192904 | 1 | 7.442441E-20 | 1.000000 | S, A |
| 1 | Average signs | ≥5 | 20 | Finafloxacin | 45 | Diluent Control | 15 | 83.192904 | 1 | 7.442441E-20 | 83.192904 | 1 | 7.442441E-20 | 1.000000 | S, A |
| 1 | Total signs | ≥5 | 21 | Finafloxacin | 45 | Diluent Control | 15 | 83.192904 | 1 | 7.442441E-20 | 83.192904 | 1 | 7.442441E-20 | 1.000000 | S, A |
| 1 | Average signs | ≥5 | 21 | Finafloxacin | 45 | Diluent Control | 15 | 83.192904 | 1 | 7.442441E-20 | 83.192904 | 1 | 7.442441E-20 | 1.000000 | S, A |
| 1 | Total signs | ≥5 | 22 | Finafloxacin | 45 | Diluent Control | 15 | 83.192904 | 1 | 7.442441E-20 | 83.192904 | 1 | 7.442441E-20 | 1.000000 | S, A |
| 1 | Average signs | ≥5 | 22 | Finafloxacin | 45 | Diluent Control | 15 | 83.192904 | 1 | 7.442441E-20 | 83.192904 | 1 | 7.442441E-20 | 1.000000 | S, A |
| 1 | Total signs | ≥5 | 23 | Finafloxacin | 45 | Diluent Control | 15 | 83.192904 | 1 | 7.442441E-20 | 83.192904 | 1 | 7.442441E-20 | 1.000000 | S, A |
| 1 | Average signs | ≥5 | 23 | Finafloxacin | 45 | Diluent Control | 15 | 83.192904 | 1 | 7.442441E-20 | 83.192904 | 1 | 7.442441E-20 | 1.000000 | S, A |
| 1 | Total signs | ≥5 | 24 | Finafloxacin | 45 | Diluent Control | 15 | 83.192904 | 1 | 7.442441E-20 | 83.192904 | 1 | 7.442441E-20 | 1.000000 | S, A |
| 1 | Average signs | ≥5 | 24 | Finafloxacin | 45 | Diluent Control | 15 | 83.192904 | 1 | 7.442441E-20 | 83.192904 | 1 | 7.442441E-20 | 1.000000 | S, A |
| 1 | Total signs | ≥5 | 25 | Finafloxacin | 45 | Diluent Control | 15 | 83.192904 | 1 | 7.442441E-20 | 83.192904 | 1 | 7.442441E-20 | 1.000000 | S, A |
| 1 | Average signs | ≥5 | 25 | Finafloxacin | 45 | Diluent Control | 15 | 83.192904 | 1 | 7.442441E-20 | 83.192904 | 1 | 7.442441E-20 | 1.000000 | S, A |
| 1 | Total signs | ≥5 | 26 | Finafloxacin | 45 | Diluent Control | 15 | 83.192904 | 1 | 7.442441E-20 | 83.192904 | 1 | 7.442441E-20 | 1.000000 | S, A |
| 1 | Average signs | ≥5 | 26 | Finafloxacin | 45 | Diluent Control | 15 | 83.192904 | 1 | 7.442441E-20 | 83.192904 | 1 | 7.442441E-20 | 1.000000 | S, A |
| 1 | Total signs | ≥5 | 27 | Finafloxacin | 45 | Diluent Control | 15 | 83.192904 | 1 | 7.442441E-20 | 83.192904 | 1 | 7.442441E-20 | 1.000000 | S, A |
| 1 | Average signs | ≥5 | 27 | Finafloxacin | 45 | Diluent Control | 15 | 83.192904 | 1 | 7.442441E-20 | 83.192904 | 1 | 7.442441E-20 | 1.000000 | S, A |
| 1 | Total signs | ≥5 | 28 | Finafloxacin | 45 | Diluent Control | 15 | 83.192904 | 1 | 7.442441E-20 | 83.192904 | 1 | 7.442441E-20 | 1.000000 | S, A |
| 1 | Average signs | ≥5 | 28 | Finafloxacin | 45 | Diluent Control | 15 | 83.192904 | 1 | 7.442441E-20 | 83.192904 | 1 | 7.442441E-20 | 1.000000 | S, A |
| 1 | Total signs | ≥5 | 29 | Finafloxacin | 45 | Diluent Control | 15 | 83.192904 | 1 | 7.442441E-20 | 83.192904 | 1 | 7.442441E-20 | 1.000000 | S, A |
| 1 | Average signs | ≥5 | 29 | Finafloxacin | 45 | Diluent Control | 15 | 83.192904 | 1 | 7.442441E-20 | 83.192904 | 1 | 7.442441E-20 | 1.000000 | S, A |
| 1 | Total signs | ≥5 | 30 | Finafloxacin | 45 | Diluent Control | 15 | 83.192904 | 1 | 7.442441E-20 | 83.192904 | 1 | 7.442441E-20 | 1.000000 | S, A |
| 1 | Average signs | ≥5 | 30 | Finafloxacin | 45 | Diluent Control | 15 | 83.192904 | 1 | 7.442441E-20 | 83.192904 | 1 | 7.442441E-20 | 1.000000 | S, A |
| 1 | Total signs | ≥5 | 20 | Co-trimoxazole | 45 | Diluent Control | 15 | 83.192904 | 1 | 7.442441E-20 | 83.192904 | 1 | 7.442441E-20 | 1.000000 | S, A |
| 1 | Average signs | ≥5 | 20 | Co-trimoxazole | 45 | Diluent Control | 15 | 83.192904 | 1 | 7.442441E-20 | 83.192904 | 1 | 7.442441E-20 | 1.000000 | S, A |
| 1 | Total signs | ≥5 | 21 | Co-trimoxazole | 45 | Diluent Control | 15 | 83.192904 | 1 | 7.442441E-20 | 83.192904 | 1 | 7.442441E-20 | 1.000000 | S, A |
| 1 | Average signs | ≥5 | 21 | Co-trimoxazole | 45 | Diluent Control | 15 | 83.192904 | 1 | 7.442441E-20 | 83.192904 | 1 | 7.442441E-20 | 1.000000 | S, A |
| 1 | Total signs | ≥5 | 22 | Co-trimoxazole | 45 | Diluent Control | 15 | 83.192904 | 1 | 7.442441E-20 | 83.192904 | 1 | 7.442441E-20 | 1.000000 | S, A |
| 1 | Average signs | ≥5 | 22 | Co-trimoxazole | 45 | Diluent Control | 15 | 83.192904 | 1 | 7.442441E-20 | 83.192904 | 1 | 7.442441E-20 | 1.000000 | S, A |
| 1 | Total signs | ≥5 | 23 | Co-trimoxazole | 45 | Diluent Control | 15 | 83.192904 | 1 | 7.442441E-20 | 83.192904 | 1 | 7.442441E-20 | 1.000000 | S, A |
| 1 | Average signs | ≥5 | 23 | Co-trimoxazole | 45 | Diluent Control | 15 | 83.192904 | 1 | 7.442441E-20 | 83.192904 | 1 | 7.442441E-20 | 1.000000 | S, A |
| 1 | Total signs | ≥5 | 24 | Co-trimoxazole | 45 | Diluent Control | 15 | 83.192904 | 1 | 7.442441E-20 | 83.192904 | 1 | 7.442441E-20 | 1.000000 | S, A |
| 1 | Average signs | ≥5 | 24 | Co-trimoxazole | 45 | Diluent Control | 15 | 83.192904 | 1 | 7.442441E-20 | 83.192904 | 1 | 7.442441E-20 | 1.000000 | S, A |
| 1 | Total signs | ≥5 | 25 | Co-trimoxazole | 45 | Diluent Control | 15 | 83.192904 | 1 | 7.442441E-20 | 83.192904 | 1 | 7.442441E-20 | 1.000000 | S, A |
| 1 | Average signs | ≥5 | 25 | Co-trimoxazole | 45 | Diluent Control | 15 | 83.192904 | 1 | 7.442441E-20 | 83.192904 | 1 | 7.442441E-20 | 1.000000 | S, A |
| 1 | Total signs | ≥5 | 26 | Co-trimoxazole | 45 | Diluent Control | 15 | 83.192904 | 1 | 7.442441E-20 | 83.192904 | 1 | 7.442441E-20 | 1.000000 | S, A |
| 1 | Average signs | ≥5 | 26 | Co-trimoxazole | 45 | Diluent Control | 15 | 83.192904 | 1 | 7.442441E-20 | 83.192904 | 1 | 7.442441E-20 | 1.000000 | S, A |
| 1 | Total signs | ≥5 | 27 | Co-trimoxazole | 45 | Diluent Control | 15 | 83.192904 | 1 | 7.442441E-20 | 83.192904 | 1 | 7.442441E-20 | 1.000000 | S, A |
| 1 | Average signs | ≥5 | 27 | Co-trimoxazole | 45 | Diluent Control | 15 | 83.192904 | 1 | 7.442441E-20 | 83.192904 | 1 | 7.442441E-20 | 1.000000 | S, A |
| 1 | Total signs | ≥5 | 28 | Co-trimoxazole | 45 | Diluent Control | 15 | 83.192904 | 1 | 7.442441E-20 | 83.192904 | 1 | 7.442441E-20 | 1.000000 | S, A |
| 1 | Average signs | ≥5 | 28 | Co-trimoxazole | 45 | Diluent Control | 15 | 83.192904 | 1 | 7.442441E-20 | 83.192904 | 1 | 7.442441E-20 | 1.000000 | S, A |
| 1 | Total signs | ≥5 | 29 | Co-trimoxazole | 45 | Diluent Control | 15 | 83.192904 | 1 | 7.442441E-20 | 83.192904 | 1 | 7.442441E-20 | 1.000000 | S, A |
| 1 | Average signs | ≥5 | 29 | Co-trimoxazole | 45 | Diluent Control | 15 | 83.192904 | 1 | 7.442441E-20 | 83.192904 | 1 | 7.442441E-20 | 1.000000 | S, A |
| 1 | Total signs | ≥5 | 30 | Co-trimoxazole | 45 | Diluent Control | 15 | 83.192904 | 1 | 7.442441E-20 | 83.192904 | 1 | 7.442441E-20 | 1.000000 | S, A |
| 1 | Average signs | ≥5 | 30 | Co-trimoxazole | 45 | Diluent Control | 15 | 83.192904 | 1 | 7.442441E-20 | 83.192904 | 1 | 7.442441E-20 | 1.000000 | S, A |
| 1 | Total signs | ≥5 | 20 | Co-trimoxazole | 45 | Finafloxacin | 45 | 3.008698 | 1 | 8.281878E-02 | 11.725428 | 1 | 6.165186E-04 | 134.332979 | S, Â |
| 1 | Average signs | ≥5 | 20 | Co-trimoxazole | 45 | Finafloxacin | 45 | 2.210295 | 1 | 1.370924E-01 | 11.725428 | 1 | 6.165186E-04 | 222.365395 | S, Â |
| 1 | Total signs | ≥5 | 21 | Co-trimoxazole | 45 | Finafloxacin | 45 | 5.530084 | 1 | 1.869221E-02 | 11.725428 | 1 | 6.165186E-04 | 30.318971 | S, A |
| 1 | Average signs | ≥5 | 21 | Co-trimoxazole | 45 | Finafloxacin | 45 | 4.724232 | 1 | 2.974046E-02 | 11.725428 | 1 | 6.165186E-04 | 48.239358 | S, A |
| 1 | Total signs | ≥5 | 22 | Co-trimoxazole | 45 | Finafloxacin | 45 | 8.359797 | 1 | 3.836133E-03 | 11.725428 | 1 | 6.165186E-04 | 6.222250 | S, A |
| 1 | Average signs | ≥5 | 22 | Co-trimoxazole | 45 | Finafloxacin | 45 | 7.025823 | 1 | 8.034256E-03 | 11.725428 | 1 | 6.165186E-04 | 13.031651 | S, A |
| 1 | Total signs | ≥5 | 23 | Co-trimoxazole | 45 | Finafloxacin | 45 | 12.815275 | 1 | 3.438008E-04 | 11.725428 | 1 | 6.165186E-04 | 0.557649 | S, A |
| 1 | Average signs | ≥5 | 23 | Co-trimoxazole | 45 | Finafloxacin | 45 | 11.515654 | 1 | 6.901255E-04 | 11.725428 | 1 | 6.165186E-04 | 1.119391 | S, A |
| 1 | Total signs | ≥5 | 24 | Co-trimoxazole | 45 | Finafloxacin | 45 | 12.894554 | 1 | 3.295396E-04 | 11.725428 | 1 | 6.165186E-04 | 0.534517 | S, A |
| 1 | Average signs | ≥5 | 24 | Co-trimoxazole | 45 | Finafloxacin | 45 | 12.017587 | 1 | 5.270089E-04 | 11.725428 | 1 | 6.165186E-04 | 0.854814 | S, A |
| 1 | Total signs | ≥5 | 25 | Co-trimoxazole | 45 | Finafloxacin | 45 | 12.839425 | 1 | 3.393919E-04 | 11.725428 | 1 | 6.165186E-04 | 0.550497 | S, A |
| 1 | Average signs | ≥5 | 25 | Co-trimoxazole | 45 | Finafloxacin | 45 | 12.130275 | 1 | 4.960982E-04 | 11.725428 | 1 | 6.165186E-04 | 0.804677 | S, A |
| 1 | Total signs | ≥5 | 26 | Co-trimoxazole | 45 | Finafloxacin | 45 | 12.912319 | 1 | 3.264266E-04 | 11.725428 | 1 | 6.165186E-04 | 0.529468 | S, A |
| 1 | Average signs | ≥5 | 26 | Co-trimoxazole | 45 | Finafloxacin | 45 | 12.278893 | 1 | 4.581099E-04 | 11.725428 | 1 | 6.165186E-04 | 0.743059 | S, A |
| 1 | Total signs | ≥5 | 27 | Co-trimoxazole | 45 | Finafloxacin | 45 | 16.098652 | 1 | 6.012680E-05 | 11.725428 | 1 | 6.165186E-04 | 0.097526 | S, A |
| 1 | Average signs | ≥5 | 27 | Co-trimoxazole | 45 | Finafloxacin | 45 | 15.184937 | 1 | 9.747787E-05 | 11.725428 | 1 | 6.165186E-04 | 0.158110 | S, A |
| 1 | Total signs | ≥5 | 28 | Co-trimoxazole | 45 | Finafloxacin | 45 | 18.064275 | 1 | 2.135713E-05 | 11.725428 | 1 | 6.165186E-04 | 0.034642 | S, A |
| 1 | Average signs | ≥5 | 28 | Co-trimoxazole | 45 | Finafloxacin | 45 | 17.199327 | 1 | 3.365555E-05 | 11.725428 | 1 | 6.165186E-04 | 0.054590 | S, A |
| 1 | Total signs | ≥5 | 29 | Co-trimoxazole | 45 | Finafloxacin | 45 | 18.326159 | 1 | 1.861337E-05 | 11.725428 | 1 | 6.165186E-04 | 0.030191 | S, A |
| 1 | Average signs | ≥5 | 29 | Co-trimoxazole | 45 | Finafloxacin | 45 | 17.199327 | 1 | 3.365555E-05 | 11.725428 | 1 | 6.165186E-04 | 0.054590 | S, A |
| 1 | Total signs | ≥5 | 30 | Co-trimoxazole | 45 | Finafloxacin | 45 | 18.326159 | 1 | 1.861337E-05 | 11.725428 | 1 | 6.165186E-04 | 0.030191 | S, A |
| 1 | Average signs | ≥5 | 30 | Co-trimoxazole | 45 | Finafloxacin | 45 | 17.393597 | 1 | 3.038478E-05 | 11.725428 | 1 | 6.165186E-04 | 0.049284 | S, A |
| 2 | Total signs | ≥5 | 20 | Finafloxacin | 90 | Diluent Control | 20 | 136.184833 | 1 | 1.817952E-31 | 136.184833 | 1 | 1.817952E-31 | 1.000000 | S, A |
| 2 | Average signs | ≥5 | 20 | Finafloxacin | 90 | Diluent Control | 20 | 136.184833 | 1 | 1.817952E-31 | 136.184833 | 1 | 1.817952E-31 | 1.000000 | S, A |
| 2 | Total signs | ≥5 | 21 | Finafloxacin | 90 | Diluent Control | 20 | 136.184833 | 1 | 1.817952E-31 | 136.184833 | 1 | 1.817952E-31 | 1.000000 | S, A |
| 2 | Average signs | ≥5 | 21 | Finafloxacin | 90 | Diluent Control | 20 | 136.184833 | 1 | 1.817952E-31 | 136.184833 | 1 | 1.817952E-31 | 1.000000 | S, A |
| 2 | Total signs | ≥5 | 22 | Finafloxacin | 90 | Diluent Control | 20 | 136.184833 | 1 | 1.817952E-31 | 136.184833 | 1 | 1.817952E-31 | 1.000000 | S, A |
| 2 | Average signs | ≥5 | 22 | Finafloxacin | 90 | Diluent Control | 20 | 136.184833 | 1 | 1.817952E-31 | 136.184833 | 1 | 1.817952E-31 | 1.000000 | S, A |
| 2 | Total signs | ≥5 | 23 | Finafloxacin | 90 | Diluent Control | 20 | 136.184833 | 1 | 1.817952E-31 | 136.184833 | 1 | 1.817952E-31 | 1.000000 | S, A |
| 2 | Average signs | ≥5 | 23 | Finafloxacin | 90 | Diluent Control | 20 | 136.184833 | 1 | 1.817952E-31 | 136.184833 | 1 | 1.817952E-31 | 1.000000 | S, A |
| 2 | Total signs | ≥5 | 24 | Finafloxacin | 90 | Diluent Control | 20 | 136.184833 | 1 | 1.817952E-31 | 136.184833 | 1 | 1.817952E-31 | 1.000000 | S, A |
| 2 | Average signs | ≥5 | 24 | Finafloxacin | 90 | Diluent Control | 20 | 136.184833 | 1 | 1.817952E-31 | 136.184833 | 1 | 1.817952E-31 | 1.000000 | S, A |
| 2 | Total signs | ≥5 | 25 | Finafloxacin | 90 | Diluent Control | 20 | 136.184833 | 1 | 1.817952E-31 | 136.184833 | 1 | 1.817952E-31 | 1.000000 | S, A |
| 2 | Average signs | ≥5 | 25 | Finafloxacin | 90 | Diluent Control | 20 | 136.184833 | 1 | 1.817952E-31 | 136.184833 | 1 | 1.817952E-31 | 1.000000 | S, A |
| 2 | Total signs | ≥5 | 26 | Finafloxacin | 90 | Diluent Control | 20 | 136.184833 | 1 | 1.817952E-31 | 136.184833 | 1 | 1.817952E-31 | 1.000000 | S, A |
| 2 | Average signs | ≥5 | 26 | Finafloxacin | 90 | Diluent Control | 20 | 136.184833 | 1 | 1.817952E-31 | 136.184833 | 1 | 1.817952E-31 | 1.000000 | S, A |
| 2 | Total signs | ≥5 | 27 | Finafloxacin | 90 | Diluent Control | 20 | 136.184833 | 1 | 1.817952E-31 | 136.184833 | 1 | 1.817952E-31 | 1.000000 | S, A |
| 2 | Average signs | ≥5 | 27 | Finafloxacin | 90 | Diluent Control | 20 | 136.184833 | 1 | 1.817952E-31 | 136.184833 | 1 | 1.817952E-31 | 1.000000 | S, A |
| 2 | Total signs | ≥5 | 28 | Finafloxacin | 90 | Diluent Control | 20 | 136.184833 | 1 | 1.817952E-31 | 136.184833 | 1 | 1.817952E-31 | 1.000000 | S, A |
| 2 | Average signs | ≥5 | 28 | Finafloxacin | 90 | Diluent Control | 20 | 136.184833 | 1 | 1.817952E-31 | 136.184833 | 1 | 1.817952E-31 | 1.000000 | S, A |
| 2 | Total signs | ≥5 | 29 | Finafloxacin | 90 | Diluent Control | 20 | 136.184833 | 1 | 1.817952E-31 | 136.184833 | 1 | 1.817952E-31 | 1.000000 | S, A |
| 2 | Average signs | ≥5 | 29 | Finafloxacin | 90 | Diluent Control | 20 | 136.184833 | 1 | 1.817952E-31 | 136.184833 | 1 | 1.817952E-31 | 1.000000 | S, A |
| 2 | Total signs | ≥5 | 30 | Finafloxacin | 90 | Diluent Control | 20 | 136.184833 | 1 | 1.817952E-31 | 136.184833 | 1 | 1.817952E-31 | 1.000000 | S, A |
| 2 | Average signs | ≥5 | 30 | Finafloxacin | 90 | Diluent Control | 20 | 136.184833 | 1 | 1.817952E-31 | 136.184833 | 1 | 1.817952E-31 | 1.000000 | S, A |
| 3 | Total signs | ≥5 | 20 | Finafloxacin | 40 | Diluent Control | 15 | 65.229390 | 1 | 6.666781E-16 | 65.229390 | 1 | 6.666781E-16 | 1.000000 | S, A |
| 3 | Average signs | ≥5 | 20 | Finafloxacin | 40 | Diluent Control | 15 | 65.229390 | 1 | 6.666781E-16 | 65.229390 | 1 | 6.666781E-16 | 1.000000 | S, A |
| 3 | Total signs | ≥5 | 21 | Finafloxacin | 40 | Diluent Control | 15 | 65.229390 | 1 | 6.666781E-16 | 65.229390 | 1 | 6.666781E-16 | 1.000000 | S, A |
| 3 | Average signs | ≥5 | 21 | Finafloxacin | 40 | Diluent Control | 15 | 65.229390 | 1 | 6.666781E-16 | 65.229390 | 1 | 6.666781E-16 | 1.000000 | S, A |
| 3 | Total signs | ≥5 | 22 | Finafloxacin | 40 | Diluent Control | 15 | 65.229390 | 1 | 6.666781E-16 | 65.229390 | 1 | 6.666781E-16 | 1.000000 | S, A |
| 3 | Average signs | ≥5 | 22 | Finafloxacin | 40 | Diluent Control | 15 | 65.229390 | 1 | 6.666781E-16 | 65.229390 | 1 | 6.666781E-16 | 1.000000 | S, A |
| 3 | Total signs | ≥5 | 23 | Finafloxacin | 40 | Diluent Control | 15 | 65.229390 | 1 | 6.666781E-16 | 65.229390 | 1 | 6.666781E-16 | 1.000000 | S, A |
| 3 | Average signs | ≥5 | 23 | Finafloxacin | 40 | Diluent Control | 15 | 65.229390 | 1 | 6.666781E-16 | 65.229390 | 1 | 6.666781E-16 | 1.000000 | S, A |
| 3 | Total signs | ≥5 | 24 | Finafloxacin | 40 | Diluent Control | 15 | 65.229390 | 1 | 6.666781E-16 | 65.229390 | 1 | 6.666781E-16 | 1.000000 | S, A |
| 3 | Average signs | ≥5 | 24 | Finafloxacin | 40 | Diluent Control | 15 | 65.229390 | 1 | 6.666781E-16 | 65.229390 | 1 | 6.666781E-16 | 1.000000 | S, A |
| 3 | Total signs | ≥5 | 25 | Finafloxacin | 40 | Diluent Control | 15 | 65.229390 | 1 | 6.666781E-16 | 65.229390 | 1 | 6.666781E-16 | 1.000000 | S, A |
| 3 | Average signs | ≥5 | 25 | Finafloxacin | 40 | Diluent Control | 15 | 65.229390 | 1 | 6.666781E-16 | 65.229390 | 1 | 6.666781E-16 | 1.000000 | S, A |
| 3 | Total signs | ≥5 | 26 | Finafloxacin | 40 | Diluent Control | 15 | 65.229390 | 1 | 6.666781E-16 | 65.229390 | 1 | 6.666781E-16 | 1.000000 | S, A |
| 3 | Average signs | ≥5 | 26 | Finafloxacin | 40 | Diluent Control | 15 | 65.229390 | 1 | 6.666781E-16 | 65.229390 | 1 | 6.666781E-16 | 1.000000 | S, A |
| 3 | Total signs | ≥5 | 27 | Finafloxacin | 40 | Diluent Control | 15 | 65.229390 | 1 | 6.666781E-16 | 65.229390 | 1 | 6.666781E-16 | 1.000000 | S, A |
| 3 | Average signs | ≥5 | 27 | Finafloxacin | 40 | Diluent Control | 15 | 65.229390 | 1 | 6.666781E-16 | 65.229390 | 1 | 6.666781E-16 | 1.000000 | S, A |
| 3 | Total signs | ≥5 | 28 | Finafloxacin | 40 | Diluent Control | 15 | 65.229390 | 1 | 6.666781E-16 | 65.229390 | 1 | 6.666781E-16 | 1.000000 | S, A |
| 3 | Average signs | ≥5 | 28 | Finafloxacin | 40 | Diluent Control | 15 | 65.229390 | 1 | 6.666781E-16 | 65.229390 | 1 | 6.666781E-16 | 1.000000 | S, A |
| 3 | Total signs | ≥5 | 29 | Finafloxacin | 40 | Diluent Control | 15 | 65.229390 | 1 | 6.666781E-16 | 65.229390 | 1 | 6.666781E-16 | 1.000000 | S, A |
| 3 | Average signs | ≥5 | 29 | Finafloxacin | 40 | Diluent Control | 15 | 65.229390 | 1 | 6.666781E-16 | 65.229390 | 1 | 6.666781E-16 | 1.000000 | S, A |
| 3 | Total signs | ≥5 | 30 | Finafloxacin | 40 | Diluent Control | 15 | 65.229390 | 1 | 6.666781E-16 | 65.229390 | 1 | 6.666781E-16 | 1.000000 | S, A |
| 3 | Average signs | ≥5 | 30 | Finafloxacin | 40 | Diluent Control | 15 | 65.229390 | 1 | 6.666781E-16 | 65.229390 | 1 | 6.666781E-16 | 1.000000 | S, A |
| 3 | Total signs | ≥5 | 20 | Doxycycline | 40 | Diluent Control | 15 | 65.229390 | 1 | 6.666781E-16 | 65.229390 | 1 | 6.666781E-16 | 1.000000 | S, A |
| 3 | Average signs | ≥5 | 20 | Doxycycline | 40 | Diluent Control | 15 | 65.229390 | 1 | 6.666781E-16 | 65.229390 | 1 | 6.666781E-16 | 1.000000 | S, A |
| 3 | Total signs | ≥5 | 21 | Doxycycline | 40 | Diluent Control | 15 | 65.229390 | 1 | 6.666781E-16 | 65.229390 | 1 | 6.666781E-16 | 1.000000 | S, A |
| 3 | Average signs | ≥5 | 21 | Doxycycline | 40 | Diluent Control | 15 | 65.229390 | 1 | 6.666781E-16 | 65.229390 | 1 | 6.666781E-16 | 1.000000 | S, A |
| 3 | Total signs | ≥5 | 22 | Doxycycline | 40 | Diluent Control | 15 | 65.229390 | 1 | 6.666781E-16 | 65.229390 | 1 | 6.666781E-16 | 1.000000 | S, A |
| 3 | Average signs | ≥5 | 22 | Doxycycline | 40 | Diluent Control | 15 | 65.229390 | 1 | 6.666781E-16 | 65.229390 | 1 | 6.666781E-16 | 1.000000 | S, A |
| 3 | Total signs | ≥5 | 23 | Doxycycline | 40 | Diluent Control | 15 | 65.229390 | 1 | 6.666781E-16 | 65.229390 | 1 | 6.666781E-16 | 1.000000 | S, A |
| 3 | Average signs | ≥5 | 23 | Doxycycline | 40 | Diluent Control | 15 | 65.229390 | 1 | 6.666781E-16 | 65.229390 | 1 | 6.666781E-16 | 1.000000 | S, A |
| 3 | Total signs | ≥5 | 24 | Doxycycline | 40 | Diluent Control | 15 | 65.229390 | 1 | 6.666781E-16 | 65.229390 | 1 | 6.666781E-16 | 1.000000 | S, A |
| 3 | Average signs | ≥5 | 24 | Doxycycline | 40 | Diluent Control | 15 | 65.229390 | 1 | 6.666781E-16 | 65.229390 | 1 | 6.666781E-16 | 1.000000 | S, A |
| 3 | Total signs | ≥5 | 25 | Doxycycline | 40 | Diluent Control | 15 | 65.229390 | 1 | 6.666781E-16 | 65.229390 | 1 | 6.666781E-16 | 1.000000 | S, A |
| 3 | Average signs | ≥5 | 25 | Doxycycline | 40 | Diluent Control | 15 | 65.229390 | 1 | 6.666781E-16 | 65.229390 | 1 | 6.666781E-16 | 1.000000 | S, A |
| 3 | Total signs | ≥5 | 26 | Doxycycline | 40 | Diluent Control | 15 | 65.229390 | 1 | 6.666781E-16 | 65.229390 | 1 | 6.666781E-16 | 1.000000 | S, A |
| 3 | Average signs | ≥5 | 26 | Doxycycline | 40 | Diluent Control | 15 | 65.229390 | 1 | 6.666781E-16 | 65.229390 | 1 | 6.666781E-16 | 1.000000 | S, A |
| 3 | Total signs | ≥5 | 27 | Doxycycline | 40 | Diluent Control | 15 | 65.229390 | 1 | 6.666781E-16 | 65.229390 | 1 | 6.666781E-16 | 1.000000 | S, A |
| 3 | Average signs | ≥5 | 27 | Doxycycline | 40 | Diluent Control | 15 | 65.229390 | 1 | 6.666781E-16 | 65.229390 | 1 | 6.666781E-16 | 1.000000 | S, A |
| 3 | Total signs | ≥5 | 28 | Doxycycline | 40 | Diluent Control | 15 | 65.229390 | 1 | 6.666781E-16 | 65.229390 | 1 | 6.666781E-16 | 1.000000 | S, A |
| 3 | Average signs | ≥5 | 28 | Doxycycline | 40 | Diluent Control | 15 | 65.229390 | 1 | 6.666781E-16 | 65.229390 | 1 | 6.666781E-16 | 1.000000 | S, A |
| 3 | Total signs | ≥5 | 29 | Doxycycline | 40 | Diluent Control | 15 | 65.229390 | 1 | 6.666781E-16 | 65.229390 | 1 | 6.666781E-16 | 1.000000 | S, A |
| 3 | Average signs | ≥5 | 29 | Doxycycline | 40 | Diluent Control | 15 | 65.229390 | 1 | 6.666781E-16 | 65.229390 | 1 | 6.666781E-16 | 1.000000 | S, A |
| 3 | Total signs | ≥5 | 30 | Doxycycline | 40 | Diluent Control | 15 | 65.229390 | 1 | 6.666781E-16 | 65.229390 | 1 | 6.666781E-16 | 1.000000 | S, A |
| 3 | Average signs | ≥5 | 30 | Doxycycline | 40 | Diluent Control | 15 | 65.229390 | 1 | 6.666781E-16 | 65.229390 | 1 | 6.666781E-16 | 1.000000 | S, A |
| 3 | Total signs | ≥5 | 20 | Doxycycline | 40 | Finafloxacin | 40 | 9.494787 | 1 | 2.060565E-03 | 4.326465 | 1 | 3.752411E-02 | 0.054913 | S, A |
| 3 | Average signs | ≥5 | 20 | Doxycycline | 40 | Finafloxacin | 40 | 7.520325 | 1 | 6.100668E-03 | 4.326465 | 1 | 3.752411E-02 | 0.162580 | S, A |
| 3 | Total signs | ≥5 | 21 | Doxycycline | 40 | Finafloxacin | 40 | 7.922800 | 1 | 4.881567E-03 | 4.326465 | 1 | 3.752411E-02 | 0.130092 | S, A |
| 3 | Average signs | ≥5 | 21 | Doxycycline | 40 | Finafloxacin | 40 | 6.133141 | 1 | 1.326710E-02 | 4.326465 | 1 | 3.752411E-02 | 0.353562 | S, A |
| 3 | Total signs | ≥5 | 22 | Doxycycline | 40 | Finafloxacin | 40 | 7.921558 | 1 | 4.884919E-03 | 4.326465 | 1 | 3.752411E-02 | 0.130181 | S, A |
| 3 | Average signs | ≥5 | 22 | Doxycycline | 40 | Finafloxacin | 40 | 6.131944 | 1 | 1.327608E-02 | 4.326465 | 1 | 3.752411E-02 | 0.353801 | S, A |
| 3 | Total signs | ≥5 | 23 | Doxycycline | 40 | Finafloxacin | 40 | 6.120132 | 1 | 1.336508E-02 | 4.326465 | 1 | 3.752411E-02 | 0.356173 | S, A |
| 3 | Average signs | ≥5 | 23 | Doxycycline | 40 | Finafloxacin | 40 | 4.410026 | 1 | 3.572831E-02 | 4.326465 | 1 | 3.752411E-02 | 0.952143 | S, A |
| 3 | Total signs | ≥5 | 24 | Doxycycline | 40 | Finafloxacin | 40 | 7.083096 | 1 | 7.781446E-03 | 4.326465 | 1 | 3.752411E-02 | 0.207372 | S, A |
| 3 | Average signs | ≥5 | 24 | Doxycycline | 40 | Finafloxacin | 40 | 5.337381 | 1 | 2.087280E-02 | 4.326465 | 1 | 3.752411E-02 | 0.556251 | S, A |
| 3 | Total signs | ≥5 | 25 | Doxycycline | 40 | Finafloxacin | 40 | 5.930439 | 1 | 1.488153E-02 | 4.326465 | 1 | 3.752411E-02 | 0.396586 | S, A |
| 3 | Average signs | ≥5 | 25 | Doxycycline | 40 | Finafloxacin | 40 | 4.394122 | 1 | 3.606301E-02 | 4.326465 | 1 | 3.752411E-02 | 0.961063 | S, A |
| 3 | Total signs | ≥5 | 26 | Doxycycline | 40 | Finafloxacin | 40 | 4.962875 | 1 | 2.589712E-02 | 4.326465 | 1 | 3.752411E-02 | 0.690146 | S, A |
| 3 | Average signs | ≥5 | 26 | Doxycycline | 40 | Finafloxacin | 40 | 3.457570 | 1 | 6.296279E-02 | 4.326465 | 1 | 3.752411E-02 | 1.677929 | S, Â |
| 3 | Total signs | ≥5 | 27 | Doxycycline | 40 | Finafloxacin | 40 | 5.480121 | 1 | 1.923392E-02 | 4.326465 | 1 | 3.752411E-02 | 0.512575 | S, A |
| 3 | Average signs | ≥5 | 27 | Doxycycline | 40 | Finafloxacin | 40 | 3.798393 | 1 | 5.130181E-02 | 4.326465 | 1 | 3.752411E-02 | 1.367169 | S, Â |
| 3 | Total signs | ≥5 | 28 | Doxycycline | 40 | Finafloxacin | 40 | 7.230527 | 1 | 7.167418E-03 | 4.326465 | 1 | 3.752411E-02 | 0.191008 | S, A |
| 3 | Average signs | ≥5 | 28 | Doxycycline | 40 | Finafloxacin | 40 | 5.521333 | 1 | 1.878594E-02 | 4.326465 | 1 | 3.752411E-02 | 0.500637 | S, A |
| 3 | Total signs | ≥5 | 29 | Doxycycline | 40 | Finafloxacin | 40 | 7.230527 | 1 | 7.167418E-03 | 4.326465 | 1 | 3.752411E-02 | 0.191008 | S, A |
| 3 | Average signs | ≥5 | 29 | Doxycycline | 40 | Finafloxacin | 40 | 5.521333 | 1 | 1.878594E-02 | 4.326465 | 1 | 3.752411E-02 | 0.500637 | S, A |
| 3 | Total signs | ≥5 | 30 | Doxycycline | 40 | Finafloxacin | 40 | 7.230527 | 1 | 7.167418E-03 | 4.326465 | 1 | 3.752411E-02 | 0.191008 | S, A |
| 3 | Average signs | ≥5 | 30 | Doxycycline | 40 | Finafloxacin | 40 | 5.521333 | 1 | 1.878594E-02 | 4.326465 | 1 | 3.752411E-02 | 0.500637 | S, A |
| 3 | Total signs | ≥5 | 20 | Finafloxacin & Doxycycline | 40 | Diluent Control | 15 | 46.872846 | 1 | 7.574496E-12 | 46.872846 | 1 | 7.574496E-12 | 1.000000 | S, A |
| 3 | Average signs | ≥5 | 20 | Finafloxacin & Doxycycline | 40 | Diluent Control | 15 | 46.872846 | 1 | 7.574496E-12 | 46.872846 | 1 | 7.574496E-12 | 1.000000 | S, A |
| 3 | Total signs | ≥5 | 21 | Finafloxacin & Doxycycline | 40 | Diluent Control | 15 | 46.872846 | 1 | 7.574496E-12 | 46.872846 | 1 | 7.574496E-12 | 1.000000 | S, A |
| 3 | Average signs | ≥5 | 21 | Finafloxacin & Doxycycline | 40 | Diluent Control | 15 | 46.872846 | 1 | 7.574496E-12 | 46.872846 | 1 | 7.574496E-12 | 1.000000 | S, A |
| 3 | Total signs | ≥5 | 22 | Finafloxacin & Doxycycline | 40 | Diluent Control | 15 | 46.872846 | 1 | 7.574496E-12 | 46.872846 | 1 | 7.574496E-12 | 1.000000 | S, A |
| 3 | Average signs | ≥5 | 22 | Finafloxacin & Doxycycline | 40 | Diluent Control | 15 | 46.872846 | 1 | 7.574496E-12 | 46.872846 | 1 | 7.574496E-12 | 1.000000 | S, A |
| 3 | Total signs | ≥5 | 23 | Finafloxacin & Doxycycline | 40 | Diluent Control | 15 | 46.872846 | 1 | 7.574496E-12 | 46.872846 | 1 | 7.574496E-12 | 1.000000 | S, A |
| 3 | Average signs | ≥5 | 23 | Finafloxacin & Doxycycline | 40 | Diluent Control | 15 | 46.872846 | 1 | 7.574496E-12 | 46.872846 | 1 | 7.574496E-12 | 1.000000 | S, A |
| 3 | Total signs | ≥5 | 24 | Finafloxacin & Doxycycline | 40 | Diluent Control | 15 | 46.872846 | 1 | 7.574496E-12 | 46.872846 | 1 | 7.574496E-12 | 1.000000 | S, A |
| 3 | Average signs | ≥5 | 24 | Finafloxacin & Doxycycline | 40 | Diluent Control | 15 | 46.872846 | 1 | 7.574496E-12 | 46.872846 | 1 | 7.574496E-12 | 1.000000 | S, A |
| 3 | Total signs | ≥5 | 25 | Finafloxacin & Doxycycline | 40 | Diluent Control | 15 | 46.872846 | 1 | 7.574496E-12 | 46.872846 | 1 | 7.574496E-12 | 1.000000 | S, A |
| 3 | Average signs | ≥5 | 25 | Finafloxacin & Doxycycline | 40 | Diluent Control | 15 | 46.872846 | 1 | 7.574496E-12 | 46.872846 | 1 | 7.574496E-12 | 1.000000 | S, A |
| 3 | Total signs | ≥5 | 26 | Finafloxacin & Doxycycline | 40 | Diluent Control | 15 | 46.872846 | 1 | 7.574496E-12 | 46.872846 | 1 | 7.574496E-12 | 1.000000 | S, A |
| 3 | Average signs | ≥5 | 26 | Finafloxacin & Doxycycline | 40 | Diluent Control | 15 | 46.872846 | 1 | 7.574496E-12 | 46.872846 | 1 | 7.574496E-12 | 1.000000 | S, A |
| 3 | Total signs | ≥5 | 27 | Finafloxacin & Doxycycline | 40 | Diluent Control | 15 | 46.872846 | 1 | 7.574496E-12 | 46.872846 | 1 | 7.574496E-12 | 1.000000 | S, A |
| 3 | Average signs | ≥5 | 27 | Finafloxacin & Doxycycline | 40 | Diluent Control | 15 | 46.872846 | 1 | 7.574496E-12 | 46.872846 | 1 | 7.574496E-12 | 1.000000 | S, A |
| 3 | Total signs | ≥5 | 28 | Finafloxacin & Doxycycline | 40 | Diluent Control | 15 | 46.872846 | 1 | 7.574496E-12 | 46.872846 | 1 | 7.574496E-12 | 1.000000 | S, A |
| 3 | Average signs | ≥5 | 28 | Finafloxacin & Doxycycline | 40 | Diluent Control | 15 | 46.872846 | 1 | 7.574496E-12 | 46.872846 | 1 | 7.574496E-12 | 1.000000 | S, A |
| 3 | Total signs | ≥5 | 29 | Finafloxacin & Doxycycline | 40 | Diluent Control | 15 | 46.872846 | 1 | 7.574496E-12 | 46.872846 | 1 | 7.574496E-12 | 1.000000 | S, A |
| 3 | Average signs | ≥5 | 29 | Finafloxacin & Doxycycline | 40 | Diluent Control | 15 | 46.872846 | 1 | 7.574496E-12 | 46.872846 | 1 | 7.574496E-12 | 1.000000 | S, A |
| 3 | Total signs | ≥5 | 30 | Finafloxacin & Doxycycline | 40 | Diluent Control | 15 | 46.872846 | 1 | 7.574496E-12 | 46.872846 | 1 | 7.574496E-12 | 1.000000 | S, A |
| 3 | Average signs | ≥5 | 30 | Finafloxacin & Doxycycline | 40 | Diluent Control | 15 | 46.872846 | 1 | 7.574496E-12 | 46.872846 | 1 | 7.574496E-12 | 1.000000 | S, A |
| 3 | Total signs | ≥5 | 20 | Finafloxacin & Doxycycline | 40 | Finafloxacin | 40 | 0.511166 | 1 | 4.746345E-01 | 0.709539 | 1 | 3.995968E-01 | 1.187784 | Ŝ, Â |
| 3 | Average signs | ≥5 | 20 | Finafloxacin & Doxycycline | 40 | Finafloxacin | 40 | 1.010082 | 1 | 3.148832E-01 | 0.709539 | 1 | 3.995968E-01 | 0.788002 | Ŝ, Â |
| 3 | Total signs | ≥5 | 21 | Finafloxacin & Doxycycline | 40 | Finafloxacin | 40 | 0.519836 | 1 | 4.709118E-01 | 0.709539 | 1 | 3.995968E-01 | 1.178468 | Ŝ, Â |
| 3 | Average signs | ≥5 | 21 | Finafloxacin & Doxycycline | 40 | Finafloxacin | 40 | 1.022745 | 1 | 3.118688E-01 | 0.709539 | 1 | 3.995968E-01 | 0.780459 | Ŝ, Â |
| 3 | Total signs | ≥5 | 22 | Finafloxacin & Doxycycline | 40 | Finafloxacin | 40 | 0.507920 | 1 | 4.760405E-01 | 0.709539 | 1 | 3.995968E-01 | 1.191302 | Ŝ, Â |
| 3 | Average signs | ≥5 | 22 | Finafloxacin & Doxycycline | 40 | Finafloxacin | 40 | 1.004097 | 1 | 3.163213E-01 | 0.709539 | 1 | 3.995968E-01 | 0.791601 | Ŝ, Â |
| 3 | Total signs | ≥5 | 23 | Finafloxacin & Doxycycline | 40 | Finafloxacin | 40 | 0.193853 | 1 | 6.597294E-01 | 0.709539 | 1 | 3.995968E-01 | 1.650988 | Ŝ, Â |
| 3 | Average signs | ≥5 | 23 | Finafloxacin & Doxycycline | 40 | Finafloxacin | 40 | 0.543344 | 1 | 4.610503E-01 | 0.709539 | 1 | 3.995968E-01 | 1.153789 | Ŝ, Â |
| 3 | Total signs | ≥5 | 24 | Finafloxacin & Doxycycline | 40 | Finafloxacin | 40 | 0.517801 | 1 | 4.717814E-01 | 0.709539 | 1 | 3.995968E-01 | 1.180644 | Ŝ, Â |
| 3 | Average signs | ≥5 | 24 | Finafloxacin & Doxycycline | 40 | Finafloxacin | 40 | 1.087494 | 1 | 2.970271E-01 | 0.709539 | 1 | 3.995968E-01 | 0.743317 | Ŝ, Â |
| 3 | Total signs | ≥5 | 25 | Finafloxacin & Doxycycline | 40 | Finafloxacin | 40 | 0.526837 | 1 | 4.679396E-01 | 0.709539 | 1 | 3.995968E-01 | 1.171029 | Ŝ, Â |
| 3 | Average signs | ≥5 | 25 | Finafloxacin & Doxycycline | 40 | Finafloxacin | 40 | 1.101193 | 1 | 2.940044E-01 | 0.709539 | 1 | 3.995968E-01 | 0.735753 | Ŝ, Â |
| 3 | Total signs | ≥5 | 26 | Finafloxacin & Doxycycline | 40 | Finafloxacin | 40 | 0.156492 | 1 | 6.924069E-01 | 0.709539 | 1 | 3.995968E-01 | 1.732764 | Ŝ, Â |
| 3 | Average signs | ≥5 | 26 | Finafloxacin & Doxycycline | 40 | Finafloxacin | 40 | 0.527210 | 1 | 4.677824E-01 | 0.709539 | 1 | 3.995968E-01 | 1.170636 | Ŝ, Â |
| 3 | Total signs | ≥5 | 27 | Finafloxacin & Doxycycline | 40 | Finafloxacin | 40 | 0.494527 | 1 | 4.819150E-01 | 0.709539 | 1 | 3.995968E-01 | 1.206003 | Ŝ, Â |
| 3 | Average signs | ≥5 | 27 | Finafloxacin & Doxycycline | 40 | Finafloxacin | 40 | 1.142105 | 1 | 2.852081E-01 | 0.709539 | 1 | 3.995968E-01 | 0.713740 | Ŝ, Â |
| 3 | Total signs | ≥5 | 28 | Finafloxacin & Doxycycline | 40 | Finafloxacin | 40 | 0.578893 | 1 | 4.467466E-01 | 0.709539 | 1 | 3.995968E-01 | 1.117993 | Ŝ, Â |
| 3 | Average signs | ≥5 | 28 | Finafloxacin & Doxycycline | 40 | Finafloxacin | 40 | 1.403252 | 1 | 2.361798E-01 | 0.709539 | 1 | 3.995968E-01 | 0.591045 | Ŝ, Â |
| 3 | Total signs | ≥5 | 29 | Finafloxacin & Doxycycline | 40 | Finafloxacin | 40 | 0.578893 | 1 | 4.467466E-01 | 0.709539 | 1 | 3.995968E-01 | 1.117993 | Ŝ, Â |
| 3 | Average signs | ≥5 | 29 | Finafloxacin & Doxycycline | 40 | Finafloxacin | 40 | 1.403252 | 1 | 2.361798E-01 | 0.709539 | 1 | 3.995968E-01 | 0.591045 | Ŝ, Â |
| 3 | Total signs | ≥5 | 30 | Finafloxacin & Doxycycline | 40 | Finafloxacin | 40 | 0.161476 | 1 | 6.878010E-01 | 0.709539 | 1 | 3.995968E-01 | 1.721238 | Ŝ, Â |
| 3 | Average signs | ≥5 | 30 | Finafloxacin & Doxycycline | 40 | Finafloxacin | 40 | 0.709539 | 1 | 3.995968E-01 | 0.709539 | 1 | 3.995968E-01 | 1.000000 | Ŝ, Â |
| 3 | Total signs | ≥5 | 20 | Finafloxacin & Doxycycline | 40 | Doxycycline | 40 | 5.247107 | 1 | 2.198329E-02 | 1.597411 | 1 | 2.062705E-01 | 0.106575 | Ŝ, A |
| 3 | Average signs | ≥5 | 20 | Finafloxacin & Doxycycline | 40 | Doxycycline | 40 | 2.870004 | 1 | 9.024466E-02 | 1.597411 | 1 | 2.062705E-01 | 0.437506 | Ŝ, Â |
| 3 | Total signs | ≥5 | 21 | Finafloxacin & Doxycycline | 40 | Doxycycline | 40 | 4.189132 | 1 | 4.068392E-02 | 1.597411 | 1 | 2.062705E-01 | 0.197236 | Ŝ, A |
| 3 | Average signs | ≥5 | 21 | Finafloxacin & Doxycycline | 40 | Doxycycline | 40 | 2.092471 | 1 | 1.480265E-01 | 1.597411 | 1 | 2.062705E-01 | 0.717633 | Ŝ, Â |
| 3 | Total signs | ≥5 | 22 | Finafloxacin & Doxycycline | 40 | Doxycycline | 40 | 4.197281 | 1 | 4.048885E-02 | 1.597411 | 1 | 2.062705E-01 | 0.196290 | Ŝ, A |
| 3 | Average signs | ≥5 | 22 | Finafloxacin & Doxycycline | 40 | Doxycycline | 40 | 2.071806 | 1 | 1.500437E-01 | 1.597411 | 1 | 2.062705E-01 | 0.727412 | Ŝ, Â |
| 3 | Total signs | ≥5 | 23 | Finafloxacin & Doxycycline | 40 | Doxycycline | 40 | 3.813253 | 1 | 5.084860E-02 | 1.597411 | 1 | 2.062705E-01 | 0.246514 | Ŝ, Â |
| 3 | Average signs | ≥5 | 23 | Finafloxacin & Doxycycline | 40 | Doxycycline | 40 | 1.663650 | 1 | 1.971112E-01 | 1.597411 | 1 | 2.062705E-01 | 0.955596 | Ŝ, Â |
| 3 | Total signs | ≥5 | 24 | Finafloxacin & Doxycycline | 40 | Doxycycline | 40 | 3.731715 | 1 | 5.338856E-02 | 1.597411 | 1 | 2.062705E-01 | 0.258828 | Ŝ, Â |
| 3 | Average signs | ≥5 | 24 | Finafloxacin & Doxycycline | 40 | Doxycycline | 40 | 1.608566 | 1 | 2.046935E-01 | 1.597411 | 1 | 2.062705E-01 | 0.992355 | Ŝ, Â |
| 3 | Total signs | ≥5 | 25 | Finafloxacin & Doxycycline | 40 | Doxycycline | 40 | 2.901569 | 1 | 8.849335E-02 | 1.597411 | 1 | 2.062705E-01 | 0.429016 | Ŝ, Â |
| 3 | Average signs | ≥5 | 25 | Finafloxacin & Doxycycline | 40 | Doxycycline | 40 | 1.112079 | 1 | 2.916305E-01 | 1.597411 | 1 | 2.062705E-01 | 1.413826 | Ŝ, Â |
| 3 | Total signs | ≥5 | 26 | Finafloxacin & Doxycycline | 40 | Doxycycline | 40 | 3.375862 | 1 | 6.615797E-02 | 1.597411 | 1 | 2.062705E-01 | 0.320734 | Ŝ, Â |
| 3 | Average signs | ≥5 | 26 | Finafloxacin & Doxycycline | 40 | Doxycycline | 40 | 1.333774 | 1 | 2.481350E-01 | 1.597411 | 1 | 2.062705E-01 | 1.202959 | Ŝ, Â |
| 3 | Total signs | ≥5 | 27 | Finafloxacin & Doxycycline | 40 | Doxycycline | 40 | 2.705162 | 1 | 1.000239E-01 | 1.597411 | 1 | 2.062705E-01 | 0.484916 | Ŝ, Â |
| 3 | Average signs | ≥5 | 27 | Finafloxacin & Doxycycline | 40 | Doxycycline | 40 | 0.823965 | 1 | 3.640236E-01 | 1.597411 | 1 | 2.062705E-01 | 1.764787 | Ŝ, Â |
| 3 | Total signs | ≥5 | 28 | Finafloxacin & Doxycycline | 40 | Doxycycline | 40 | 3.965698 | 1 | 4.643628E-02 | 1.597411 | 1 | 2.062705E-01 | 0.225123 | Ŝ, A |
| 3 | Average signs | ≥5 | 28 | Finafloxacin & Doxycycline | 40 | Doxycycline | 40 | 1.561802 | 1 | 2.114016E-01 | 1.597411 | 1 | 2.062705E-01 | 1.024875 | Ŝ, Â |
| 3 | Total signs | ≥5 | 29 | Finafloxacin & Doxycycline | 40 | Doxycycline | 40 | 3.965698 | 1 | 4.643628E-02 | 1.597411 | 1 | 2.062705E-01 | 0.225123 | Ŝ, A |
| 3 | Average signs | ≥5 | 29 | Finafloxacin & Doxycycline | 40 | Doxycycline | 40 | 1.561802 | 1 | 2.114016E-01 | 1.597411 | 1 | 2.062705E-01 | 1.024875 | Ŝ, Â |
| 3 | Total signs | ≥5 | 30 | Finafloxacin & Doxycycline | 40 | Doxycycline | 40 | 5.440163 | 1 | 1.967883E-02 | 1.597411 | 1 | 2.062705E-01 | 0.095403 | Ŝ, A |
| 3 | Average signs | ≥5 | 30 | Finafloxacin & Doxycycline | 40 | Doxycycline | 40 | 2.562879 | 1 | 1.093992E-01 | 1.597411 | 1 | 2.062705E-01 | 0.530368 | Ŝ, Â |
| 4 | Total signs | ≥5 | 20 | Finafloxacin 36 h | 45 | Finafloxacin 48 h | 44 | 0.563247 | 1 | 4.529551E-01 | 1.730962 | 1 | 1.882881E-01 | 2.405649 | Ŝ, Â |
| 4 | Average signs | ≥5 | 20 | Finafloxacin 36 h | 45 | Finafloxacin 48 h | 44 | 0.445966 | 1 | 5.042569E-01 | 1.730962 | 1 | 1.882881E-01 | 2.678114 | Ŝ, Â |
| 4 | Total signs | ≥5 | 21 | Finafloxacin 36 h | 45 | Finafloxacin 48 h | 44 | 0.321268 | 1 | 5.708468E-01 | 1.730962 | 1 | 1.882881E-01 | 3.031774 | Ŝ, Â |
| 4 | Average signs | ≥5 | 21 | Finafloxacin 36 h | 45 | Finafloxacin 48 h | 44 | 0.235782 | 1 | 6.272695E-01 | 1.730962 | 1 | 1.882881E-01 | 3.331435 | Ŝ, Â |
| 4 | Total signs | ≥5 | 22 | Finafloxacin 36 h | 45 | Finafloxacin 48 h | 44 | 0.325051 | 1 | 5.685880E-01 | 1.730962 | 1 | 1.882881E-01 | 3.019777 | Ŝ, Â |
| 4 | Average signs | ≥5 | 22 | Finafloxacin 36 h | 45 | Finafloxacin 48 h | 44 | 0.454321 | 1 | 5.002902E-01 | 1.730962 | 1 | 1.882881E-01 | 2.657047 | Ŝ, Â |
| 4 | Total signs | ≥5 | 23 | Finafloxacin 36 h | 45 | Finafloxacin 48 h | 44 | 0.113019 | 1 | 7.367325E-01 | 1.730962 | 1 | 1.882881E-01 | 3.912794 | Ŝ, Â |
| 4 | Average signs | ≥5 | 23 | Finafloxacin 36 h | 45 | Finafloxacin 48 h | 44 | 0.211535 | 1 | 6.455672E-01 | 1.730962 | 1 | 1.882881E-01 | 3.428615 | Ŝ, Â |
| 4 | Total signs | ≥5 | 24 | Finafloxacin 36 h | 45 | Finafloxacin 48 h | 44 | 0.071976 | 1 | 7.884806E-01 | 1.730962 | 1 | 1.882881E-01 | 4.187629 | Ŝ, Â |
| 4 | Average signs | ≥5 | 24 | Finafloxacin 36 h | 45 | Finafloxacin 48 h | 44 | 0.570395 | 1 | 4.501019E-01 | 1.730962 | 1 | 1.882881E-01 | 2.390496 | Ŝ, Â |
| 4 | Total signs | ≥5 | 25 | Finafloxacin 36 h | 45 | Finafloxacin 48 h | 44 | 0.246354 | 1 | 6.196540E-01 | 1.730962 | 1 | 1.882881E-01 | 3.290989 | Ŝ, Â |
| 4 | Average signs | ≥5 | 25 | Finafloxacin 36 h | 45 | Finafloxacin 48 h | 44 | 0.960632 | 1 | 3.270278E-01 | 1.730962 | 1 | 1.882881E-01 | 1.736848 | Ŝ, Â |
| 4 | Total signs | ≥5 | 26 | Finafloxacin 36 h | 45 | Finafloxacin 48 h | 44 | 0.226556 | 1 | 6.340896E-01 | 1.730962 | 1 | 1.882881E-01 | 3.367657 | Ŝ, Â |
| 4 | Average signs | ≥5 | 26 | Finafloxacin 36 h | 45 | Finafloxacin 48 h | 44 | 0.971426 | 1 | 3.243248E-01 | 1.730962 | 1 | 1.882881E-01 | 1.722493 | Ŝ, Â |
| 4 | Total signs | ≥5 | 27 | Finafloxacin 36 h | 45 | Finafloxacin 48 h | 44 | 0.223035 | 1 | 6.367368E-01 | 1.730962 | 1 | 1.882881E-01 | 3.381716 | Ŝ, Â |
| 4 | Average signs | ≥5 | 27 | Finafloxacin 36 h | 45 | Finafloxacin 48 h | 44 | 0.949191 | 1 | 3.299252E-01 | 1.730962 | 1 | 1.882881E-01 | 1.752236 | Ŝ, Â |
| 4 | Total signs | ≥5 | 28 | Finafloxacin 36 h | 45 | Finafloxacin 48 h | 44 | 0.392689 | 1 | 5.308895E-01 | 1.730962 | 1 | 1.882881E-01 | 2.819560 | Ŝ, Â |
| 4 | Average signs | ≥5 | 28 | Finafloxacin 36 h | 45 | Finafloxacin 48 h | 44 | 1.317932 | 1 | 2.509636E-01 | 1.730962 | 1 | 1.882881E-01 | 1.332870 | Ŝ, Â |
| 4 | Total signs | ≥5 | 29 | Finafloxacin 36 h | 45 | Finafloxacin 48 h | 44 | 0.376433 | 1 | 5.395184E-01 | 1.730962 | 1 | 1.882881E-01 | 2.865388 | Ŝ, Â |
| 4 | Average signs | ≥5 | 29 | Finafloxacin 36 h | 45 | Finafloxacin 48 h | 44 | 1.840847 | 1 | 1.748517E-01 | 1.730962 | 1 | 1.882881E-01 | 0.928639 | Ŝ, Â |
| 4 | Total signs | ≥5 | 30 | Finafloxacin 36 h | 45 | Finafloxacin 48 h | 44 | 0.347491 | 1 | 5.555367E-01 | 1.730962 | 1 | 1.882881E-01 | 2.950462 | Ŝ, Â |
| 4 | Average signs | ≥5 | 30 | Finafloxacin 36 h | 45 | Finafloxacin 48 h | 44 | 1.812049 | 1 | 1.782626E-01 | 1.730962 | 1 | 1.882881E-01 | 0.946755 | Ŝ, Â |
| 4 | Total signs | ≥5 | 20 | Finafloxacin 36 h | 45 | Diluent Control | 88 | 94.766888 | 1 | 2.141784E-22 | 94.766888 | 1 | 2.141784E-22 | 1.000000 | S, A |
| 4 | Average signs | ≥5 | 20 | Finafloxacin 36 h | 45 | Diluent Control | 88 | 94.766888 | 1 | 2.141784E-22 | 94.766888 | 1 | 2.141784E-22 | 1.000000 | S, A |
| 4 | Total signs | ≥5 | 21 | Finafloxacin 36 h | 45 | Diluent Control | 88 | 94.766888 | 1 | 2.141784E-22 | 94.766888 | 1 | 2.141784E-22 | 1.000000 | S, A |
| 4 | Average signs | ≥5 | 21 | Finafloxacin 36 h | 45 | Diluent Control | 88 | 94.766888 | 1 | 2.141784E-22 | 94.766888 | 1 | 2.141784E-22 | 1.000000 | S, A |
| 4 | Total signs | ≥5 | 22 | Finafloxacin 36 h | 45 | Diluent Control | 88 | 94.766888 | 1 | 2.141784E-22 | 94.766888 | 1 | 2.141784E-22 | 1.000000 | S, A |
| 4 | Average signs | ≥5 | 22 | Finafloxacin 36 h | 45 | Diluent Control | 88 | 94.766888 | 1 | 2.141784E-22 | 94.766888 | 1 | 2.141784E-22 | 1.000000 | S, A |
| 4 | Total signs | ≥5 | 23 | Finafloxacin 36 h | 45 | Diluent Control | 88 | 94.766888 | 1 | 2.141784E-22 | 94.766888 | 1 | 2.141784E-22 | 1.000000 | S, A |
| 4 | Average signs | ≥5 | 23 | Finafloxacin 36 h | 45 | Diluent Control | 88 | 94.766888 | 1 | 2.141784E-22 | 94.766888 | 1 | 2.141784E-22 | 1.000000 | S, A |
| 4 | Total signs | ≥5 | 24 | Finafloxacin 36 h | 45 | Diluent Control | 88 | 94.766888 | 1 | 2.141784E-22 | 94.766888 | 1 | 2.141784E-22 | 1.000000 | S, A |
| 4 | Average signs | ≥5 | 24 | Finafloxacin 36 h | 45 | Diluent Control | 88 | 94.766888 | 1 | 2.141784E-22 | 94.766888 | 1 | 2.141784E-22 | 1.000000 | S, A |
| 4 | Total signs | ≥5 | 25 | Finafloxacin 36 h | 45 | Diluent Control | 88 | 94.766888 | 1 | 2.141784E-22 | 94.766888 | 1 | 2.141784E-22 | 1.000000 | S, A |
| 4 | Average signs | ≥5 | 25 | Finafloxacin 36 h | 45 | Diluent Control | 88 | 94.766888 | 1 | 2.141784E-22 | 94.766888 | 1 | 2.141784E-22 | 1.000000 | S, A |
| 4 | Total signs | ≥5 | 26 | Finafloxacin 36 h | 45 | Diluent Control | 88 | 94.766888 | 1 | 2.141784E-22 | 94.766888 | 1 | 2.141784E-22 | 1.000000 | S, A |
| 4 | Average signs | ≥5 | 26 | Finafloxacin 36 h | 45 | Diluent Control | 88 | 94.766888 | 1 | 2.141784E-22 | 94.766888 | 1 | 2.141784E-22 | 1.000000 | S, A |
| 4 | Total signs | ≥5 | 27 | Finafloxacin 36 h | 45 | Diluent Control | 88 | 94.766888 | 1 | 2.141784E-22 | 94.766888 | 1 | 2.141784E-22 | 1.000000 | S, A |
| 4 | Average signs | ≥5 | 27 | Finafloxacin 36 h | 45 | Diluent Control | 88 | 94.766888 | 1 | 2.141784E-22 | 94.766888 | 1 | 2.141784E-22 | 1.000000 | S, A |
| 4 | Total signs | ≥5 | 28 | Finafloxacin 36 h | 45 | Diluent Control | 88 | 94.766888 | 1 | 2.141784E-22 | 94.766888 | 1 | 2.141784E-22 | 1.000000 | S, A |
| 4 | Average signs | ≥5 | 28 | Finafloxacin 36 h | 45 | Diluent Control | 88 | 94.766888 | 1 | 2.141784E-22 | 94.766888 | 1 | 2.141784E-22 | 1.000000 | S, A |
| 4 | Total signs | ≥5 | 29 | Finafloxacin 36 h | 45 | Diluent Control | 88 | 94.766888 | 1 | 2.141784E-22 | 94.766888 | 1 | 2.141784E-22 | 1.000000 | S, A |
| 4 | Average signs | ≥5 | 29 | Finafloxacin 36 h | 45 | Diluent Control | 88 | 94.766888 | 1 | 2.141784E-22 | 94.766888 | 1 | 2.141784E-22 | 1.000000 | S, A |
| 4 | Total signs | ≥5 | 30 | Finafloxacin 36 h | 45 | Diluent Control | 88 | 94.766888 | 1 | 2.141784E-22 | 94.766888 | 1 | 2.141784E-22 | 1.000000 | S, A |
| 4 | Average signs | ≥5 | 30 | Finafloxacin 36 h | 45 | Diluent Control | 88 | 94.766888 | 1 | 2.141784E-22 | 94.766888 | 1 | 2.141784E-22 | 1.000000 | S, A |
| 4 | Total signs | ≥5 | 20 | Finafloxacin 48 h | 44 | Diluent Control | 88 | 72.966845 | 1 | 1.318462E-17 | 72.966845 | 1 | 1.318462E-17 | 1.000000 | S, A |
| 4 | Average signs | ≥5 | 20 | Finafloxacin 48 h | 44 | Diluent Control | 88 | 72.966845 | 1 | 1.318462E-17 | 72.966845 | 1 | 1.318462E-17 | 1.000000 | S, A |
| 4 | Total signs | ≥5 | 21 | Finafloxacin 48 h | 44 | Diluent Control | 88 | 72.966845 | 1 | 1.318462E-17 | 72.966845 | 1 | 1.318462E-17 | 1.000000 | S, A |
| 4 | Average signs | ≥5 | 21 | Finafloxacin 48 h | 44 | Diluent Control | 88 | 72.966845 | 1 | 1.318462E-17 | 72.966845 | 1 | 1.318462E-17 | 1.000000 | S, A |
| 4 | Total signs | ≥5 | 22 | Finafloxacin 48 h | 44 | Diluent Control | 88 | 72.966845 | 1 | 1.318462E-17 | 72.966845 | 1 | 1.318462E-17 | 1.000000 | S, A |
| 4 | Average signs | ≥5 | 22 | Finafloxacin 48 h | 44 | Diluent Control | 88 | 72.966845 | 1 | 1.318462E-17 | 72.966845 | 1 | 1.318462E-17 | 1.000000 | S, A |
| 4 | Total signs | ≥5 | 23 | Finafloxacin 48 h | 44 | Diluent Control | 88 | 72.966845 | 1 | 1.318462E-17 | 72.966845 | 1 | 1.318462E-17 | 1.000000 | S, A |
| 4 | Average signs | ≥5 | 23 | Finafloxacin 48 h | 44 | Diluent Control | 88 | 72.966845 | 1 | 1.318462E-17 | 72.966845 | 1 | 1.318462E-17 | 1.000000 | S, A |
| 4 | Total signs | ≥5 | 24 | Finafloxacin 48 h | 44 | Diluent Control | 88 | 72.966845 | 1 | 1.318462E-17 | 72.966845 | 1 | 1.318462E-17 | 1.000000 | S, A |
| 4 | Average signs | ≥5 | 24 | Finafloxacin 48 h | 44 | Diluent Control | 88 | 72.966845 | 1 | 1.318462E-17 | 72.966845 | 1 | 1.318462E-17 | 1.000000 | S, A |
| 4 | Total signs | ≥5 | 25 | Finafloxacin 48 h | 44 | Diluent Control | 88 | 72.966845 | 1 | 1.318462E-17 | 72.966845 | 1 | 1.318462E-17 | 1.000000 | S, A |
| 4 | Average signs | ≥5 | 25 | Finafloxacin 48 h | 44 | Diluent Control | 88 | 72.966845 | 1 | 1.318462E-17 | 72.966845 | 1 | 1.318462E-17 | 1.000000 | S, A |
| 4 | Total signs | ≥5 | 26 | Finafloxacin 48 h | 44 | Diluent Control | 88 | 72.966845 | 1 | 1.318462E-17 | 72.966845 | 1 | 1.318462E-17 | 1.000000 | S, A |
| 4 | Average signs | ≥5 | 26 | Finafloxacin 48 h | 44 | Diluent Control | 88 | 72.966845 | 1 | 1.318462E-17 | 72.966845 | 1 | 1.318462E-17 | 1.000000 | S, A |
| 4 | Total signs | ≥5 | 27 | Finafloxacin 48 h | 44 | Diluent Control | 88 | 72.966845 | 1 | 1.318462E-17 | 72.966845 | 1 | 1.318462E-17 | 1.000000 | S, A |
| 4 | Average signs | ≥5 | 27 | Finafloxacin 48 h | 44 | Diluent Control | 88 | 72.966845 | 1 | 1.318462E-17 | 72.966845 | 1 | 1.318462E-17 | 1.000000 | S, A |
| 4 | Total signs | ≥5 | 28 | Finafloxacin 48 h | 44 | Diluent Control | 88 | 72.966845 | 1 | 1.318462E-17 | 72.966845 | 1 | 1.318462E-17 | 1.000000 | S, A |
| 4 | Average signs | ≥5 | 28 | Finafloxacin 48 h | 44 | Diluent Control | 88 | 72.966845 | 1 | 1.318462E-17 | 72.966845 | 1 | 1.318462E-17 | 1.000000 | S, A |
| 4 | Total signs | ≥5 | 29 | Finafloxacin 48 h | 44 | Diluent Control | 88 | 72.966845 | 1 | 1.318462E-17 | 72.966845 | 1 | 1.318462E-17 | 1.000000 | S, A |
| 4 | Average signs | ≥5 | 29 | Finafloxacin 48 h | 44 | Diluent Control | 88 | 72.966845 | 1 | 1.318462E-17 | 72.966845 | 1 | 1.318462E-17 | 1.000000 | S, A |
| 4 | Total signs | ≥5 | 30 | Finafloxacin 48 h | 44 | Diluent Control | 88 | 72.966845 | 1 | 1.318462E-17 | 72.966845 | 1 | 1.318462E-17 | 1.000000 | S, A |
| 4 | Average signs | ≥5 | 30 | Finafloxacin 48 h | 44 | Diluent Control | 88 | 72.966845 | 1 | 1.318462E-17 | 72.966845 | 1 | 1.318462E-17 | 1.000000 | S, A |
| 1 | Total signs | ≥6 | 20 | Finafloxacin | 45 | Diluent Control | 15 | 83.192904 | 1 | 7.442441E-20 | 83.192904 | 1 | 7.442441E-20 | 1.000000 | S, A |
| 1 | Average signs | ≥6 | 20 | Finafloxacin | 45 | Diluent Control | 15 | 83.192904 | 1 | 7.442441E-20 | 83.192904 | 1 | 7.442441E-20 | 1.000000 | S, A |
| 1 | Total signs | ≥6 | 21 | Finafloxacin | 45 | Diluent Control | 15 | 83.192904 | 1 | 7.442441E-20 | 83.192904 | 1 | 7.442441E-20 | 1.000000 | S, A |
| 1 | Average signs | ≥6 | 21 | Finafloxacin | 45 | Diluent Control | 15 | 83.192904 | 1 | 7.442441E-20 | 83.192904 | 1 | 7.442441E-20 | 1.000000 | S, A |
| 1 | Total signs | ≥6 | 22 | Finafloxacin | 45 | Diluent Control | 15 | 83.192904 | 1 | 7.442441E-20 | 83.192904 | 1 | 7.442441E-20 | 1.000000 | S, A |
| 1 | Average signs | ≥6 | 22 | Finafloxacin | 45 | Diluent Control | 15 | 83.192904 | 1 | 7.442441E-20 | 83.192904 | 1 | 7.442441E-20 | 1.000000 | S, A |
| 1 | Total signs | ≥6 | 23 | Finafloxacin | 45 | Diluent Control | 15 | 83.192904 | 1 | 7.442441E-20 | 83.192904 | 1 | 7.442441E-20 | 1.000000 | S, A |
| 1 | Average signs | ≥6 | 23 | Finafloxacin | 45 | Diluent Control | 15 | 83.192904 | 1 | 7.442441E-20 | 83.192904 | 1 | 7.442441E-20 | 1.000000 | S, A |
| 1 | Total signs | ≥6 | 24 | Finafloxacin | 45 | Diluent Control | 15 | 83.192904 | 1 | 7.442441E-20 | 83.192904 | 1 | 7.442441E-20 | 1.000000 | S, A |
| 1 | Average signs | ≥6 | 24 | Finafloxacin | 45 | Diluent Control | 15 | 83.192904 | 1 | 7.442441E-20 | 83.192904 | 1 | 7.442441E-20 | 1.000000 | S, A |
| 1 | Total signs | ≥6 | 25 | Finafloxacin | 45 | Diluent Control | 15 | 83.192904 | 1 | 7.442441E-20 | 83.192904 | 1 | 7.442441E-20 | 1.000000 | S, A |
| 1 | Average signs | ≥6 | 25 | Finafloxacin | 45 | Diluent Control | 15 | 83.192904 | 1 | 7.442441E-20 | 83.192904 | 1 | 7.442441E-20 | 1.000000 | S, A |
| 1 | Total signs | ≥6 | 26 | Finafloxacin | 45 | Diluent Control | 15 | 83.192904 | 1 | 7.442441E-20 | 83.192904 | 1 | 7.442441E-20 | 1.000000 | S, A |
| 1 | Average signs | ≥6 | 26 | Finafloxacin | 45 | Diluent Control | 15 | 83.192904 | 1 | 7.442441E-20 | 83.192904 | 1 | 7.442441E-20 | 1.000000 | S, A |
| 1 | Total signs | ≥6 | 27 | Finafloxacin | 45 | Diluent Control | 15 | 83.192904 | 1 | 7.442441E-20 | 83.192904 | 1 | 7.442441E-20 | 1.000000 | S, A |
| 1 | Average signs | ≥6 | 27 | Finafloxacin | 45 | Diluent Control | 15 | 83.192904 | 1 | 7.442441E-20 | 83.192904 | 1 | 7.442441E-20 | 1.000000 | S, A |
| 1 | Total signs | ≥6 | 28 | Finafloxacin | 45 | Diluent Control | 15 | 83.192904 | 1 | 7.442441E-20 | 83.192904 | 1 | 7.442441E-20 | 1.000000 | S, A |
| 1 | Average signs | ≥6 | 28 | Finafloxacin | 45 | Diluent Control | 15 | 83.192904 | 1 | 7.442441E-20 | 83.192904 | 1 | 7.442441E-20 | 1.000000 | S, A |
| 1 | Total signs | ≥6 | 29 | Finafloxacin | 45 | Diluent Control | 15 | 83.192904 | 1 | 7.442441E-20 | 83.192904 | 1 | 7.442441E-20 | 1.000000 | S, A |
| 1 | Average signs | ≥6 | 29 | Finafloxacin | 45 | Diluent Control | 15 | 83.192904 | 1 | 7.442441E-20 | 83.192904 | 1 | 7.442441E-20 | 1.000000 | S, A |
| 1 | Total signs | ≥6 | 30 | Finafloxacin | 45 | Diluent Control | 15 | 83.192904 | 1 | 7.442441E-20 | 83.192904 | 1 | 7.442441E-20 | 1.000000 | S, A |
| 1 | Average signs | ≥6 | 30 | Finafloxacin | 45 | Diluent Control | 15 | 83.192904 | 1 | 7.442441E-20 | 83.192904 | 1 | 7.442441E-20 | 1.000000 | S, A |
| 1 | Total signs | ≥6 | 20 | Co-trimoxazole | 45 | Diluent Control | 15 | 83.192904 | 1 | 7.442441E-20 | 83.192904 | 1 | 7.442441E-20 | 1.000000 | S, A |
| 1 | Average signs | ≥6 | 20 | Co-trimoxazole | 45 | Diluent Control | 15 | 83.192904 | 1 | 7.442441E-20 | 83.192904 | 1 | 7.442441E-20 | 1.000000 | S, A |
| 1 | Total signs | ≥6 | 21 | Co-trimoxazole | 45 | Diluent Control | 15 | 83.192904 | 1 | 7.442441E-20 | 83.192904 | 1 | 7.442441E-20 | 1.000000 | S, A |
| 1 | Average signs | ≥6 | 21 | Co-trimoxazole | 45 | Diluent Control | 15 | 83.192904 | 1 | 7.442441E-20 | 83.192904 | 1 | 7.442441E-20 | 1.000000 | S, A |
| 1 | Total signs | ≥6 | 22 | Co-trimoxazole | 45 | Diluent Control | 15 | 83.192904 | 1 | 7.442441E-20 | 83.192904 | 1 | 7.442441E-20 | 1.000000 | S, A |
| 1 | Average signs | ≥6 | 22 | Co-trimoxazole | 45 | Diluent Control | 15 | 83.192904 | 1 | 7.442441E-20 | 83.192904 | 1 | 7.442441E-20 | 1.000000 | S, A |
| 1 | Total signs | ≥6 | 23 | Co-trimoxazole | 45 | Diluent Control | 15 | 83.192904 | 1 | 7.442441E-20 | 83.192904 | 1 | 7.442441E-20 | 1.000000 | S, A |
| 1 | Average signs | ≥6 | 23 | Co-trimoxazole | 45 | Diluent Control | 15 | 83.192904 | 1 | 7.442441E-20 | 83.192904 | 1 | 7.442441E-20 | 1.000000 | S, A |
| 1 | Total signs | ≥6 | 24 | Co-trimoxazole | 45 | Diluent Control | 15 | 83.192904 | 1 | 7.442441E-20 | 83.192904 | 1 | 7.442441E-20 | 1.000000 | S, A |
| 1 | Average signs | ≥6 | 24 | Co-trimoxazole | 45 | Diluent Control | 15 | 83.192904 | 1 | 7.442441E-20 | 83.192904 | 1 | 7.442441E-20 | 1.000000 | S, A |
| 1 | Total signs | ≥6 | 25 | Co-trimoxazole | 45 | Diluent Control | 15 | 83.192904 | 1 | 7.442441E-20 | 83.192904 | 1 | 7.442441E-20 | 1.000000 | S, A |
| 1 | Average signs | ≥6 | 25 | Co-trimoxazole | 45 | Diluent Control | 15 | 83.192904 | 1 | 7.442441E-20 | 83.192904 | 1 | 7.442441E-20 | 1.000000 | S, A |
| 1 | Total signs | ≥6 | 26 | Co-trimoxazole | 45 | Diluent Control | 15 | 83.192904 | 1 | 7.442441E-20 | 83.192904 | 1 | 7.442441E-20 | 1.000000 | S, A |
| 1 | Average signs | ≥6 | 26 | Co-trimoxazole | 45 | Diluent Control | 15 | 83.192904 | 1 | 7.442441E-20 | 83.192904 | 1 | 7.442441E-20 | 1.000000 | S, A |
| 1 | Total signs | ≥6 | 27 | Co-trimoxazole | 45 | Diluent Control | 15 | 83.192904 | 1 | 7.442441E-20 | 83.192904 | 1 | 7.442441E-20 | 1.000000 | S, A |
| 1 | Average signs | ≥6 | 27 | Co-trimoxazole | 45 | Diluent Control | 15 | 83.192904 | 1 | 7.442441E-20 | 83.192904 | 1 | 7.442441E-20 | 1.000000 | S, A |
| 1 | Total signs | ≥6 | 28 | Co-trimoxazole | 45 | Diluent Control | 15 | 83.192904 | 1 | 7.442441E-20 | 83.192904 | 1 | 7.442441E-20 | 1.000000 | S, A |
| 1 | Average signs | ≥6 | 28 | Co-trimoxazole | 45 | Diluent Control | 15 | 83.192904 | 1 | 7.442441E-20 | 83.192904 | 1 | 7.442441E-20 | 1.000000 | S, A |
| 1 | Total signs | ≥6 | 29 | Co-trimoxazole | 45 | Diluent Control | 15 | 83.192904 | 1 | 7.442441E-20 | 83.192904 | 1 | 7.442441E-20 | 1.000000 | S, A |
| 1 | Average signs | ≥6 | 29 | Co-trimoxazole | 45 | Diluent Control | 15 | 83.192904 | 1 | 7.442441E-20 | 83.192904 | 1 | 7.442441E-20 | 1.000000 | S, A |
| 1 | Total signs | ≥6 | 30 | Co-trimoxazole | 45 | Diluent Control | 15 | 83.192904 | 1 | 7.442441E-20 | 83.192904 | 1 | 7.442441E-20 | 1.000000 | S, A |
| 1 | Average signs | ≥6 | 30 | Co-trimoxazole | 45 | Diluent Control | 15 | 83.192904 | 1 | 7.442441E-20 | 83.192904 | 1 | 7.442441E-20 | 1.000000 | S, A |
| 1 | Total signs | ≥6 | 20 | Co-trimoxazole | 45 | Finafloxacin | 45 | 2.327824 | 1 | 1.270794E-01 | 11.725428 | 1 | 6.165186E-04 | 206.124156 | S, Â |
| 1 | Average signs | ≥6 | 20 | Co-trimoxazole | 45 | Finafloxacin | 45 | 1.639487 | 1 | 2.003959E-01 | 11.725428 | 1 | 6.165186E-04 | 325.044283 | S, Â |
| 1 | Total signs | ≥6 | 21 | Co-trimoxazole | 45 | Finafloxacin | 45 | 4.572057 | 1 | 3.249752E-02 | 11.725428 | 1 | 6.165186E-04 | 52.711339 | S, A |
| 1 | Average signs | ≥6 | 21 | Co-trimoxazole | 45 | Finafloxacin | 45 | 3.947069 | 1 | 4.695309E-02 | 11.725428 | 1 | 6.165186E-04 | 76.158434 | S, A |
| 1 | Total signs | ≥6 | 22 | Co-trimoxazole | 45 | Finafloxacin | 45 | 6.987639 | 1 | 8.207453E-03 | 11.725428 | 1 | 6.165186E-04 | 13.312580 | S, A |
| 1 | Average signs | ≥6 | 22 | Co-trimoxazole | 45 | Finafloxacin | 45 | 6.085769 | 1 | 1.362750E-02 | 11.725428 | 1 | 6.165186E-04 | 22.103962 | S, A |
| 1 | Total signs | ≥6 | 23 | Co-trimoxazole | 45 | Finafloxacin | 45 | 11.019074 | 1 | 9.017909E-04 | 11.725428 | 1 | 6.165186E-04 | 1.462715 | S, A |
| 1 | Average signs | ≥6 | 23 | Co-trimoxazole | 45 | Finafloxacin | 45 | 10.022255 | 1 | 1.546600E-03 | 11.725428 | 1 | 6.165186E-04 | 2.508603 | S, A |
| 1 | Total signs | ≥6 | 24 | Co-trimoxazole | 45 | Finafloxacin | 45 | 10.315288 | 1 | 1.319327E-03 | 11.725428 | 1 | 6.165186E-04 | 2.139963 | S, A |
| 1 | Average signs | ≥6 | 24 | Co-trimoxazole | 45 | Finafloxacin | 45 | 8.576220 | 1 | 3.405817E-03 | 11.725428 | 1 | 6.165186E-04 | 5.524273 | S, A |
| 1 | Total signs | ≥6 | 25 | Co-trimoxazole | 45 | Finafloxacin | 45 | 10.398444 | 1 | 1.261216E-03 | 11.725428 | 1 | 6.165186E-04 | 2.045705 | S, A |
| 1 | Average signs | ≥6 | 25 | Co-trimoxazole | 45 | Finafloxacin | 45 | 8.715796 | 1 | 3.154646E-03 | 11.725428 | 1 | 6.165186E-04 | 5.116870 | S, A |
| 1 | Total signs | ≥6 | 26 | Co-trimoxazole | 45 | Finafloxacin | 45 | 10.494412 | 1 | 1.197361E-03 | 11.725428 | 1 | 6.165186E-04 | 1.942133 | S, A |
| 1 | Average signs | ≥6 | 26 | Co-trimoxazole | 45 | Finafloxacin | 45 | 8.830296 | 1 | 2.962703E-03 | 11.725428 | 1 | 6.165186E-04 | 4.805537 | S, A |
| 1 | Total signs | ≥6 | 27 | Co-trimoxazole | 45 | Finafloxacin | 45 | 13.059523 | 1 | 3.017463E-04 | 11.725428 | 1 | 6.165186E-04 | 0.489436 | S, A |
| 1 | Average signs | ≥6 | 27 | Co-trimoxazole | 45 | Finafloxacin | 45 | 12.089904 | 1 | 5.069558E-04 | 11.725428 | 1 | 6.165186E-04 | 0.822288 | S, A |
| 1 | Total signs | ≥6 | 28 | Co-trimoxazole | 45 | Finafloxacin | 45 | 14.767029 | 1 | 1.216439E-04 | 11.725428 | 1 | 6.165186E-04 | 0.197308 | S, A |
| 1 | Average signs | ≥6 | 28 | Co-trimoxazole | 45 | Finafloxacin | 45 | 14.266281 | 1 | 1.586822E-04 | 11.725428 | 1 | 6.165186E-04 | 0.257384 | S, A |
| 1 | Total signs | ≥6 | 29 | Co-trimoxazole | 45 | Finafloxacin | 45 | 14.970072 | 1 | 1.092299E-04 | 11.725428 | 1 | 6.165186E-04 | 0.177172 | S, A |
| 1 | Average signs | ≥6 | 29 | Co-trimoxazole | 45 | Finafloxacin | 45 | 14.260189 | 1 | 1.591966E-04 | 11.725428 | 1 | 6.165186E-04 | 0.258219 | S, A |
| 1 | Total signs | ≥6 | 30 | Co-trimoxazole | 45 | Finafloxacin | 45 | 14.970072 | 1 | 1.092299E-04 | 11.725428 | 1 | 6.165186E-04 | 0.177172 | S, A |
| 1 | Average signs | ≥6 | 30 | Co-trimoxazole | 45 | Finafloxacin | 45 | 14.369219 | 1 | 1.502383E-04 | 11.725428 | 1 | 6.165186E-04 | 0.243688 | S, A |
| 2 | Total signs | ≥6 | 20 | Finafloxacin | 90 | Diluent Control | 20 | 136.184833 | 1 | 1.817952E-31 | 136.184833 | 1 | 1.817952E-31 | 1.000000 | S, A |
| 2 | Average signs | ≥6 | 20 | Finafloxacin | 90 | Diluent Control | 20 | 136.184833 | 1 | 1.817952E-31 | 136.184833 | 1 | 1.817952E-31 | 1.000000 | S, A |
| 2 | Total signs | ≥6 | 21 | Finafloxacin | 90 | Diluent Control | 20 | 136.184833 | 1 | 1.817952E-31 | 136.184833 | 1 | 1.817952E-31 | 1.000000 | S, A |
| 2 | Average signs | ≥6 | 21 | Finafloxacin | 90 | Diluent Control | 20 | 136.184833 | 1 | 1.817952E-31 | 136.184833 | 1 | 1.817952E-31 | 1.000000 | S, A |
| 2 | Total signs | ≥6 | 22 | Finafloxacin | 90 | Diluent Control | 20 | 136.184833 | 1 | 1.817952E-31 | 136.184833 | 1 | 1.817952E-31 | 1.000000 | S, A |
| 2 | Average signs | ≥6 | 22 | Finafloxacin | 90 | Diluent Control | 20 | 136.184833 | 1 | 1.817952E-31 | 136.184833 | 1 | 1.817952E-31 | 1.000000 | S, A |
| 2 | Total signs | ≥6 | 23 | Finafloxacin | 90 | Diluent Control | 20 | 136.184833 | 1 | 1.817952E-31 | 136.184833 | 1 | 1.817952E-31 | 1.000000 | S, A |
| 2 | Average signs | ≥6 | 23 | Finafloxacin | 90 | Diluent Control | 20 | 136.184833 | 1 | 1.817952E-31 | 136.184833 | 1 | 1.817952E-31 | 1.000000 | S, A |
| 2 | Total signs | ≥6 | 24 | Finafloxacin | 90 | Diluent Control | 20 | 136.184833 | 1 | 1.817952E-31 | 136.184833 | 1 | 1.817952E-31 | 1.000000 | S, A |
| 2 | Average signs | ≥6 | 24 | Finafloxacin | 90 | Diluent Control | 20 | 136.184833 | 1 | 1.817952E-31 | 136.184833 | 1 | 1.817952E-31 | 1.000000 | S, A |
| 2 | Total signs | ≥6 | 25 | Finafloxacin | 90 | Diluent Control | 20 | 136.184833 | 1 | 1.817952E-31 | 136.184833 | 1 | 1.817952E-31 | 1.000000 | S, A |
| 2 | Average signs | ≥6 | 25 | Finafloxacin | 90 | Diluent Control | 20 | 136.184833 | 1 | 1.817952E-31 | 136.184833 | 1 | 1.817952E-31 | 1.000000 | S, A |
| 2 | Total signs | ≥6 | 26 | Finafloxacin | 90 | Diluent Control | 20 | 136.184833 | 1 | 1.817952E-31 | 136.184833 | 1 | 1.817952E-31 | 1.000000 | S, A |
| 2 | Average signs | ≥6 | 26 | Finafloxacin | 90 | Diluent Control | 20 | 136.184833 | 1 | 1.817952E-31 | 136.184833 | 1 | 1.817952E-31 | 1.000000 | S, A |
| 2 | Total signs | ≥6 | 27 | Finafloxacin | 90 | Diluent Control | 20 | 136.184833 | 1 | 1.817952E-31 | 136.184833 | 1 | 1.817952E-31 | 1.000000 | S, A |
| 2 | Average signs | ≥6 | 27 | Finafloxacin | 90 | Diluent Control | 20 | 136.184833 | 1 | 1.817952E-31 | 136.184833 | 1 | 1.817952E-31 | 1.000000 | S, A |
| 2 | Total signs | ≥6 | 28 | Finafloxacin | 90 | Diluent Control | 20 | 136.184833 | 1 | 1.817952E-31 | 136.184833 | 1 | 1.817952E-31 | 1.000000 | S, A |
| 2 | Average signs | ≥6 | 28 | Finafloxacin | 90 | Diluent Control | 20 | 136.184833 | 1 | 1.817952E-31 | 136.184833 | 1 | 1.817952E-31 | 1.000000 | S, A |
| 2 | Total signs | ≥6 | 29 | Finafloxacin | 90 | Diluent Control | 20 | 136.184833 | 1 | 1.817952E-31 | 136.184833 | 1 | 1.817952E-31 | 1.000000 | S, A |
| 2 | Average signs | ≥6 | 29 | Finafloxacin | 90 | Diluent Control | 20 | 136.184833 | 1 | 1.817952E-31 | 136.184833 | 1 | 1.817952E-31 | 1.000000 | S, A |
| 2 | Total signs | ≥6 | 30 | Finafloxacin | 90 | Diluent Control | 20 | 136.184833 | 1 | 1.817952E-31 | 136.184833 | 1 | 1.817952E-31 | 1.000000 | S, A |
| 2 | Average signs | ≥6 | 30 | Finafloxacin | 90 | Diluent Control | 20 | 136.184833 | 1 | 1.817952E-31 | 136.184833 | 1 | 1.817952E-31 | 1.000000 | S, A |
| 3 | Total signs | ≥6 | 20 | Finafloxacin | 40 | Diluent Control | 15 | 65.229390 | 1 | 6.666781E-16 | 65.229390 | 1 | 6.666781E-16 | 1.000000 | S, A |
| 3 | Average signs | ≥6 | 20 | Finafloxacin | 40 | Diluent Control | 15 | 65.229390 | 1 | 6.666781E-16 | 65.229390 | 1 | 6.666781E-16 | 1.000000 | S, A |
| 3 | Total signs | ≥6 | 21 | Finafloxacin | 40 | Diluent Control | 15 | 65.229390 | 1 | 6.666781E-16 | 65.229390 | 1 | 6.666781E-16 | 1.000000 | S, A |
| 3 | Average signs | ≥6 | 21 | Finafloxacin | 40 | Diluent Control | 15 | 65.229390 | 1 | 6.666781E-16 | 65.229390 | 1 | 6.666781E-16 | 1.000000 | S, A |
| 3 | Total signs | ≥6 | 22 | Finafloxacin | 40 | Diluent Control | 15 | 65.229390 | 1 | 6.666781E-16 | 65.229390 | 1 | 6.666781E-16 | 1.000000 | S, A |
| 3 | Average signs | ≥6 | 22 | Finafloxacin | 40 | Diluent Control | 15 | 65.229390 | 1 | 6.666781E-16 | 65.229390 | 1 | 6.666781E-16 | 1.000000 | S, A |
| 3 | Total signs | ≥6 | 23 | Finafloxacin | 40 | Diluent Control | 15 | 65.229390 | 1 | 6.666781E-16 | 65.229390 | 1 | 6.666781E-16 | 1.000000 | S, A |
| 3 | Average signs | ≥6 | 23 | Finafloxacin | 40 | Diluent Control | 15 | 65.229390 | 1 | 6.666781E-16 | 65.229390 | 1 | 6.666781E-16 | 1.000000 | S, A |
| 3 | Total signs | ≥6 | 24 | Finafloxacin | 40 | Diluent Control | 15 | 65.229390 | 1 | 6.666781E-16 | 65.229390 | 1 | 6.666781E-16 | 1.000000 | S, A |
| 3 | Average signs | ≥6 | 24 | Finafloxacin | 40 | Diluent Control | 15 | 65.229390 | 1 | 6.666781E-16 | 65.229390 | 1 | 6.666781E-16 | 1.000000 | S, A |
| 3 | Total signs | ≥6 | 25 | Finafloxacin | 40 | Diluent Control | 15 | 65.229390 | 1 | 6.666781E-16 | 65.229390 | 1 | 6.666781E-16 | 1.000000 | S, A |
| 3 | Average signs | ≥6 | 25 | Finafloxacin | 40 | Diluent Control | 15 | 65.229390 | 1 | 6.666781E-16 | 65.229390 | 1 | 6.666781E-16 | 1.000000 | S, A |
| 3 | Total signs | ≥6 | 26 | Finafloxacin | 40 | Diluent Control | 15 | 65.229390 | 1 | 6.666781E-16 | 65.229390 | 1 | 6.666781E-16 | 1.000000 | S, A |
| 3 | Average signs | ≥6 | 26 | Finafloxacin | 40 | Diluent Control | 15 | 65.229390 | 1 | 6.666781E-16 | 65.229390 | 1 | 6.666781E-16 | 1.000000 | S, A |
| 3 | Total signs | ≥6 | 27 | Finafloxacin | 40 | Diluent Control | 15 | 65.229390 | 1 | 6.666781E-16 | 65.229390 | 1 | 6.666781E-16 | 1.000000 | S, A |
| 3 | Average signs | ≥6 | 27 | Finafloxacin | 40 | Diluent Control | 15 | 65.229390 | 1 | 6.666781E-16 | 65.229390 | 1 | 6.666781E-16 | 1.000000 | S, A |
| 3 | Total signs | ≥6 | 28 | Finafloxacin | 40 | Diluent Control | 15 | 65.229390 | 1 | 6.666781E-16 | 65.229390 | 1 | 6.666781E-16 | 1.000000 | S, A |
| 3 | Average signs | ≥6 | 28 | Finafloxacin | 40 | Diluent Control | 15 | 65.229390 | 1 | 6.666781E-16 | 65.229390 | 1 | 6.666781E-16 | 1.000000 | S, A |
| 3 | Total signs | ≥6 | 29 | Finafloxacin | 40 | Diluent Control | 15 | 65.229390 | 1 | 6.666781E-16 | 65.229390 | 1 | 6.666781E-16 | 1.000000 | S, A |
| 3 | Average signs | ≥6 | 29 | Finafloxacin | 40 | Diluent Control | 15 | 65.229390 | 1 | 6.666781E-16 | 65.229390 | 1 | 6.666781E-16 | 1.000000 | S, A |
| 3 | Total signs | ≥6 | 30 | Finafloxacin | 40 | Diluent Control | 15 | 65.229390 | 1 | 6.666781E-16 | 65.229390 | 1 | 6.666781E-16 | 1.000000 | S, A |
| 3 | Average signs | ≥6 | 30 | Finafloxacin | 40 | Diluent Control | 15 | 65.229390 | 1 | 6.666781E-16 | 65.229390 | 1 | 6.666781E-16 | 1.000000 | S, A |
| 3 | Total signs | ≥6 | 20 | Doxycycline | 40 | Diluent Control | 15 | 65.229390 | 1 | 6.666781E-16 | 65.229390 | 1 | 6.666781E-16 | 1.000000 | S, A |
| 3 | Average signs | ≥6 | 20 | Doxycycline | 40 | Diluent Control | 15 | 65.229390 | 1 | 6.666781E-16 | 65.229390 | 1 | 6.666781E-16 | 1.000000 | S, A |
| 3 | Total signs | ≥6 | 21 | Doxycycline | 40 | Diluent Control | 15 | 65.229390 | 1 | 6.666781E-16 | 65.229390 | 1 | 6.666781E-16 | 1.000000 | S, A |
| 3 | Average signs | ≥6 | 21 | Doxycycline | 40 | Diluent Control | 15 | 65.229390 | 1 | 6.666781E-16 | 65.229390 | 1 | 6.666781E-16 | 1.000000 | S, A |
| 3 | Total signs | ≥6 | 22 | Doxycycline | 40 | Diluent Control | 15 | 65.229390 | 1 | 6.666781E-16 | 65.229390 | 1 | 6.666781E-16 | 1.000000 | S, A |
| 3 | Average signs | ≥6 | 22 | Doxycycline | 40 | Diluent Control | 15 | 65.229390 | 1 | 6.666781E-16 | 65.229390 | 1 | 6.666781E-16 | 1.000000 | S, A |
| 3 | Total signs | ≥6 | 23 | Doxycycline | 40 | Diluent Control | 15 | 65.229390 | 1 | 6.666781E-16 | 65.229390 | 1 | 6.666781E-16 | 1.000000 | S, A |
| 3 | Average signs | ≥6 | 23 | Doxycycline | 40 | Diluent Control | 15 | 65.229390 | 1 | 6.666781E-16 | 65.229390 | 1 | 6.666781E-16 | 1.000000 | S, A |
| 3 | Total signs | ≥6 | 24 | Doxycycline | 40 | Diluent Control | 15 | 65.229390 | 1 | 6.666781E-16 | 65.229390 | 1 | 6.666781E-16 | 1.000000 | S, A |
| 3 | Average signs | ≥6 | 24 | Doxycycline | 40 | Diluent Control | 15 | 65.229390 | 1 | 6.666781E-16 | 65.229390 | 1 | 6.666781E-16 | 1.000000 | S, A |
| 3 | Total signs | ≥6 | 25 | Doxycycline | 40 | Diluent Control | 15 | 65.229390 | 1 | 6.666781E-16 | 65.229390 | 1 | 6.666781E-16 | 1.000000 | S, A |
| 3 | Average signs | ≥6 | 25 | Doxycycline | 40 | Diluent Control | 15 | 65.229390 | 1 | 6.666781E-16 | 65.229390 | 1 | 6.666781E-16 | 1.000000 | S, A |
| 3 | Total signs | ≥6 | 26 | Doxycycline | 40 | Diluent Control | 15 | 65.229390 | 1 | 6.666781E-16 | 65.229390 | 1 | 6.666781E-16 | 1.000000 | S, A |
| 3 | Average signs | ≥6 | 26 | Doxycycline | 40 | Diluent Control | 15 | 65.229390 | 1 | 6.666781E-16 | 65.229390 | 1 | 6.666781E-16 | 1.000000 | S, A |
| 3 | Total signs | ≥6 | 27 | Doxycycline | 40 | Diluent Control | 15 | 65.229390 | 1 | 6.666781E-16 | 65.229390 | 1 | 6.666781E-16 | 1.000000 | S, A |
| 3 | Average signs | ≥6 | 27 | Doxycycline | 40 | Diluent Control | 15 | 65.229390 | 1 | 6.666781E-16 | 65.229390 | 1 | 6.666781E-16 | 1.000000 | S, A |
| 3 | Total signs | ≥6 | 28 | Doxycycline | 40 | Diluent Control | 15 | 65.229390 | 1 | 6.666781E-16 | 65.229390 | 1 | 6.666781E-16 | 1.000000 | S, A |
| 3 | Average signs | ≥6 | 28 | Doxycycline | 40 | Diluent Control | 15 | 65.229390 | 1 | 6.666781E-16 | 65.229390 | 1 | 6.666781E-16 | 1.000000 | S, A |
| 3 | Total signs | ≥6 | 29 | Doxycycline | 40 | Diluent Control | 15 | 65.229390 | 1 | 6.666781E-16 | 65.229390 | 1 | 6.666781E-16 | 1.000000 | S, A |
| 3 | Average signs | ≥6 | 29 | Doxycycline | 40 | Diluent Control | 15 | 65.229390 | 1 | 6.666781E-16 | 65.229390 | 1 | 6.666781E-16 | 1.000000 | S, A |
| 3 | Total signs | ≥6 | 30 | Doxycycline | 40 | Diluent Control | 15 | 65.229390 | 1 | 6.666781E-16 | 65.229390 | 1 | 6.666781E-16 | 1.000000 | S, A |
| 3 | Average signs | ≥6 | 30 | Doxycycline | 40 | Diluent Control | 15 | 65.229390 | 1 | 6.666781E-16 | 65.229390 | 1 | 6.666781E-16 | 1.000000 | S, A |
| 3 | Total signs | ≥6 | 20 | Doxycycline | 40 | Finafloxacin | 40 | 6.377765 | 1 | 1.155589E-02 | 4.326465 | 1 | 3.752411E-02 | 0.307959 | S, A |
| 3 | Average signs | ≥6 | 20 | Doxycycline | 40 | Finafloxacin | 40 | 6.377765 | 1 | 1.155589E-02 | 4.326465 | 1 | 3.752411E-02 | 0.307959 | S, A |
| 3 | Total signs | ≥6 | 21 | Doxycycline | 40 | Finafloxacin | 40 | 5.112743 | 1 | 2.375075E-02 | 4.326465 | 1 | 3.752411E-02 | 0.632946 | S, A |
| 3 | Average signs | ≥6 | 21 | Doxycycline | 40 | Finafloxacin | 40 | 5.112743 | 1 | 2.375075E-02 | 4.326465 | 1 | 3.752411E-02 | 0.632946 | S, A |
| 3 | Total signs | ≥6 | 22 | Doxycycline | 40 | Finafloxacin | 40 | 5.111622 | 1 | 2.376609E-02 | 4.326465 | 1 | 3.752411E-02 | 0.633355 | S, A |
| 3 | Average signs | ≥6 | 22 | Doxycycline | 40 | Finafloxacin | 40 | 5.111622 | 1 | 2.376609E-02 | 4.326465 | 1 | 3.752411E-02 | 0.633355 | S, A |
| 3 | Total signs | ≥6 | 23 | Doxycycline | 40 | Finafloxacin | 40 | 3.475977 | 1 | 6.226596E-02 | 4.326465 | 1 | 3.752411E-02 | 1.659359 | S, Â |
| 3 | Average signs | ≥6 | 23 | Doxycycline | 40 | Finafloxacin | 40 | 3.475977 | 1 | 6.226596E-02 | 4.326465 | 1 | 3.752411E-02 | 1.659359 | S, Â |
| 3 | Total signs | ≥6 | 24 | Doxycycline | 40 | Finafloxacin | 40 | 4.276748 | 1 | 3.863721E-02 | 4.326465 | 1 | 3.752411E-02 | 1.029664 | S, A |
| 3 | Average signs | ≥6 | 24 | Doxycycline | 40 | Finafloxacin | 40 | 4.276748 | 1 | 3.863721E-02 | 4.326465 | 1 | 3.752411E-02 | 1.029664 | S, A |
| 3 | Total signs | ≥6 | 25 | Doxycycline | 40 | Finafloxacin | 40 | 3.435375 | 1 | 6.381411E-02 | 4.326465 | 1 | 3.752411E-02 | 1.700616 | S, Â |
| 3 | Average signs | ≥6 | 25 | Doxycycline | 40 | Finafloxacin | 40 | 3.435375 | 1 | 6.381411E-02 | 4.326465 | 1 | 3.752411E-02 | 1.700616 | S, Â |
| 3 | Total signs | ≥6 | 26 | Doxycycline | 40 | Finafloxacin | 40 | 2.565054 | 1 | 1.092488E-01 | 4.326465 | 1 | 3.752411E-02 | 2.911430 | S, Â |
| 3 | Average signs | ≥6 | 26 | Doxycycline | 40 | Finafloxacin | 40 | 2.565054 | 1 | 1.092488E-01 | 4.326465 | 1 | 3.752411E-02 | 2.911430 | S, Â |
| 3 | Total signs | ≥6 | 27 | Doxycycline | 40 | Finafloxacin | 40 | 2.788552 | 1 | 9.493996E-02 | 4.326465 | 1 | 3.752411E-02 | 2.530106 | S, Â |
| 3 | Average signs | ≥6 | 27 | Doxycycline | 40 | Finafloxacin | 40 | 2.788552 | 1 | 9.493996E-02 | 4.326465 | 1 | 3.752411E-02 | 2.530106 | S, Â |
| 3 | Total signs | ≥6 | 28 | Doxycycline | 40 | Finafloxacin | 40 | 4.326465 | 1 | 3.752411E-02 | 4.326465 | 1 | 3.752411E-02 | 1.000000 | S, A |
| 3 | Average signs | ≥6 | 28 | Doxycycline | 40 | Finafloxacin | 40 | 4.326465 | 1 | 3.752411E-02 | 4.326465 | 1 | 3.752411E-02 | 1.000000 | S, A |
| 3 | Total signs | ≥6 | 29 | Doxycycline | 40 | Finafloxacin | 40 | 4.326465 | 1 | 3.752411E-02 | 4.326465 | 1 | 3.752411E-02 | 1.000000 | S, A |
| 3 | Average signs | ≥6 | 29 | Doxycycline | 40 | Finafloxacin | 40 | 4.326465 | 1 | 3.752411E-02 | 4.326465 | 1 | 3.752411E-02 | 1.000000 | S, A |
| 3 | Total signs | ≥6 | 30 | Doxycycline | 40 | Finafloxacin | 40 | 4.326465 | 1 | 3.752411E-02 | 4.326465 | 1 | 3.752411E-02 | 1.000000 | S, A |
| 3 | Average signs | ≥6 | 30 | Doxycycline | 40 | Finafloxacin | 40 | 4.326465 | 1 | 3.752411E-02 | 4.326465 | 1 | 3.752411E-02 | 1.000000 | S, A |
| 3 | Total signs | ≥6 | 20 | Finafloxacin & Doxycycline | 40 | Diluent Control | 15 | 46.872846 | 1 | 7.574496E-12 | 46.872846 | 1 | 7.574496E-12 | 1.000000 | S, A |
| 3 | Average signs | ≥6 | 20 | Finafloxacin & Doxycycline | 40 | Diluent Control | 15 | 46.872846 | 1 | 7.574496E-12 | 46.872846 | 1 | 7.574496E-12 | 1.000000 | S, A |
| 3 | Total signs | ≥6 | 21 | Finafloxacin & Doxycycline | 40 | Diluent Control | 15 | 46.872846 | 1 | 7.574496E-12 | 46.872846 | 1 | 7.574496E-12 | 1.000000 | S, A |
| 3 | Average signs | ≥6 | 21 | Finafloxacin & Doxycycline | 40 | Diluent Control | 15 | 46.872846 | 1 | 7.574496E-12 | 46.872846 | 1 | 7.574496E-12 | 1.000000 | S, A |
| 3 | Total signs | ≥6 | 22 | Finafloxacin & Doxycycline | 40 | Diluent Control | 15 | 46.872846 | 1 | 7.574496E-12 | 46.872846 | 1 | 7.574496E-12 | 1.000000 | S, A |
| 3 | Average signs | ≥6 | 22 | Finafloxacin & Doxycycline | 40 | Diluent Control | 15 | 46.872846 | 1 | 7.574496E-12 | 46.872846 | 1 | 7.574496E-12 | 1.000000 | S, A |
| 3 | Total signs | ≥6 | 23 | Finafloxacin & Doxycycline | 40 | Diluent Control | 15 | 46.872846 | 1 | 7.574496E-12 | 46.872846 | 1 | 7.574496E-12 | 1.000000 | S, A |
| 3 | Average signs | ≥6 | 23 | Finafloxacin & Doxycycline | 40 | Diluent Control | 15 | 46.872846 | 1 | 7.574496E-12 | 46.872846 | 1 | 7.574496E-12 | 1.000000 | S, A |
| 3 | Total signs | ≥6 | 24 | Finafloxacin & Doxycycline | 40 | Diluent Control | 15 | 46.872846 | 1 | 7.574496E-12 | 46.872846 | 1 | 7.574496E-12 | 1.000000 | S, A |
| 3 | Average signs | ≥6 | 24 | Finafloxacin & Doxycycline | 40 | Diluent Control | 15 | 46.872846 | 1 | 7.574496E-12 | 46.872846 | 1 | 7.574496E-12 | 1.000000 | S, A |
| 3 | Total signs | ≥6 | 25 | Finafloxacin & Doxycycline | 40 | Diluent Control | 15 | 46.872846 | 1 | 7.574496E-12 | 46.872846 | 1 | 7.574496E-12 | 1.000000 | S, A |
| 3 | Average signs | ≥6 | 25 | Finafloxacin & Doxycycline | 40 | Diluent Control | 15 | 46.872846 | 1 | 7.574496E-12 | 46.872846 | 1 | 7.574496E-12 | 1.000000 | S, A |
| 3 | Total signs | ≥6 | 26 | Finafloxacin & Doxycycline | 40 | Diluent Control | 15 | 46.872846 | 1 | 7.574496E-12 | 46.872846 | 1 | 7.574496E-12 | 1.000000 | S, A |
| 3 | Average signs | ≥6 | 26 | Finafloxacin & Doxycycline | 40 | Diluent Control | 15 | 46.872846 | 1 | 7.574496E-12 | 46.872846 | 1 | 7.574496E-12 | 1.000000 | S, A |
| 3 | Total signs | ≥6 | 27 | Finafloxacin & Doxycycline | 40 | Diluent Control | 15 | 46.872846 | 1 | 7.574496E-12 | 46.872846 | 1 | 7.574496E-12 | 1.000000 | S, A |
| 3 | Average signs | ≥6 | 27 | Finafloxacin & Doxycycline | 40 | Diluent Control | 15 | 46.872846 | 1 | 7.574496E-12 | 46.872846 | 1 | 7.574496E-12 | 1.000000 | S, A |
| 3 | Total signs | ≥6 | 28 | Finafloxacin & Doxycycline | 40 | Diluent Control | 15 | 46.872846 | 1 | 7.574496E-12 | 46.872846 | 1 | 7.574496E-12 | 1.000000 | S, A |
| 3 | Average signs | ≥6 | 28 | Finafloxacin & Doxycycline | 40 | Diluent Control | 15 | 46.872846 | 1 | 7.574496E-12 | 46.872846 | 1 | 7.574496E-12 | 1.000000 | S, A |
| 3 | Total signs | ≥6 | 29 | Finafloxacin & Doxycycline | 40 | Diluent Control | 15 | 46.872846 | 1 | 7.574496E-12 | 46.872846 | 1 | 7.574496E-12 | 1.000000 | S, A |
| 3 | Average signs | ≥6 | 29 | Finafloxacin & Doxycycline | 40 | Diluent Control | 15 | 46.872846 | 1 | 7.574496E-12 | 46.872846 | 1 | 7.574496E-12 | 1.000000 | S, A |
| 3 | Total signs | ≥6 | 30 | Finafloxacin & Doxycycline | 40 | Diluent Control | 15 | 46.872846 | 1 | 7.574496E-12 | 46.872846 | 1 | 7.574496E-12 | 1.000000 | S, A |
| 3 | Average signs | ≥6 | 30 | Finafloxacin & Doxycycline | 40 | Diluent Control | 15 | 46.872846 | 1 | 7.574496E-12 | 46.872846 | 1 | 7.574496E-12 | 1.000000 | S, A |
| 3 | Total signs | ≥6 | 20 | Finafloxacin & Doxycycline | 40 | Finafloxacin | 40 | 1.010082 | 1 | 3.148832E-01 | 0.709539 | 1 | 3.995968E-01 | 0.788002 | Ŝ, Â |
| 3 | Average signs | ≥6 | 20 | Finafloxacin & Doxycycline | 40 | Finafloxacin | 40 | 1.010082 | 1 | 3.148832E-01 | 0.709539 | 1 | 3.995968E-01 | 0.788002 | Ŝ, Â |
| 3 | Total signs | ≥6 | 21 | Finafloxacin & Doxycycline | 40 | Finafloxacin | 40 | 1.022745 | 1 | 3.118688E-01 | 0.709539 | 1 | 3.995968E-01 | 0.780459 | Ŝ, Â |
| 3 | Average signs | ≥6 | 21 | Finafloxacin & Doxycycline | 40 | Finafloxacin | 40 | 1.022745 | 1 | 3.118688E-01 | 0.709539 | 1 | 3.995968E-01 | 0.780459 | Ŝ, Â |
| 3 | Total signs | ≥6 | 22 | Finafloxacin & Doxycycline | 40 | Finafloxacin | 40 | 1.004097 | 1 | 3.163213E-01 | 0.709539 | 1 | 3.995968E-01 | 0.791601 | Ŝ, Â |
| 3 | Average signs | ≥6 | 22 | Finafloxacin & Doxycycline | 40 | Finafloxacin | 40 | 1.004097 | 1 | 3.163213E-01 | 0.709539 | 1 | 3.995968E-01 | 0.791601 | Ŝ, Â |
| 3 | Total signs | ≥6 | 23 | Finafloxacin & Doxycycline | 40 | Finafloxacin | 40 | 0.543344 | 1 | 4.610503E-01 | 0.709539 | 1 | 3.995968E-01 | 1.153789 | Ŝ, Â |
| 3 | Average signs | ≥6 | 23 | Finafloxacin & Doxycycline | 40 | Finafloxacin | 40 | 0.543344 | 1 | 4.610503E-01 | 0.709539 | 1 | 3.995968E-01 | 1.153789 | Ŝ, Â |
| 3 | Total signs | ≥6 | 24 | Finafloxacin & Doxycycline | 40 | Finafloxacin | 40 | 1.087494 | 1 | 2.970271E-01 | 0.709539 | 1 | 3.995968E-01 | 0.743317 | Ŝ, Â |
| 3 | Average signs | ≥6 | 24 | Finafloxacin & Doxycycline | 40 | Finafloxacin | 40 | 1.087494 | 1 | 2.970271E-01 | 0.709539 | 1 | 3.995968E-01 | 0.743317 | Ŝ, Â |
| 3 | Total signs | ≥6 | 25 | Finafloxacin & Doxycycline | 40 | Finafloxacin | 40 | 1.101193 | 1 | 2.940044E-01 | 0.709539 | 1 | 3.995968E-01 | 0.735753 | Ŝ, Â |
| 3 | Average signs | ≥6 | 25 | Finafloxacin & Doxycycline | 40 | Finafloxacin | 40 | 1.101193 | 1 | 2.940044E-01 | 0.709539 | 1 | 3.995968E-01 | 0.735753 | Ŝ, Â |
| 3 | Total signs | ≥6 | 26 | Finafloxacin & Doxycycline | 40 | Finafloxacin | 40 | 0.527210 | 1 | 4.677824E-01 | 0.709539 | 1 | 3.995968E-01 | 1.170636 | Ŝ, Â |
| 3 | Average signs | ≥6 | 26 | Finafloxacin & Doxycycline | 40 | Finafloxacin | 40 | 0.527210 | 1 | 4.677824E-01 | 0.709539 | 1 | 3.995968E-01 | 1.170636 | Ŝ, Â |
| 3 | Total signs | ≥6 | 27 | Finafloxacin & Doxycycline | 40 | Finafloxacin | 40 | 1.142105 | 1 | 2.852081E-01 | 0.709539 | 1 | 3.995968E-01 | 0.713740 | Ŝ, Â |
| 3 | Average signs | ≥6 | 27 | Finafloxacin & Doxycycline | 40 | Finafloxacin | 40 | 1.142105 | 1 | 2.852081E-01 | 0.709539 | 1 | 3.995968E-01 | 0.713740 | Ŝ, Â |
| 3 | Total signs | ≥6 | 28 | Finafloxacin & Doxycycline | 40 | Finafloxacin | 40 | 1.403252 | 1 | 2.361798E-01 | 0.709539 | 1 | 3.995968E-01 | 0.591045 | Ŝ, Â |
| 3 | Average signs | ≥6 | 28 | Finafloxacin & Doxycycline | 40 | Finafloxacin | 40 | 1.403252 | 1 | 2.361798E-01 | 0.709539 | 1 | 3.995968E-01 | 0.591045 | Ŝ, Â |
| 3 | Total signs | ≥6 | 29 | Finafloxacin & Doxycycline | 40 | Finafloxacin | 40 | 1.403252 | 1 | 2.361798E-01 | 0.709539 | 1 | 3.995968E-01 | 0.591045 | Ŝ, Â |
| 3 | Average signs | ≥6 | 29 | Finafloxacin & Doxycycline | 40 | Finafloxacin | 40 | 1.403252 | 1 | 2.361798E-01 | 0.709539 | 1 | 3.995968E-01 | 0.591045 | Ŝ, Â |
| 3 | Total signs | ≥6 | 30 | Finafloxacin & Doxycycline | 40 | Finafloxacin | 40 | 0.709539 | 1 | 3.995968E-01 | 0.709539 | 1 | 3.995968E-01 | 1.000000 | Ŝ, Â |
| 3 | Average signs | ≥6 | 30 | Finafloxacin & Doxycycline | 40 | Finafloxacin | 40 | 0.709539 | 1 | 3.995968E-01 | 0.709539 | 1 | 3.995968E-01 | 1.000000 | Ŝ, Â |
| 3 | Total signs | ≥6 | 20 | Finafloxacin & Doxycycline | 40 | Doxycycline | 40 | 2.194010 | 1 | 1.385482E-01 | 1.597411 | 1 | 2.062705E-01 | 0.671682 | Ŝ, Â |
| 3 | Average signs | ≥6 | 20 | Finafloxacin & Doxycycline | 40 | Doxycycline | 40 | 2.194010 | 1 | 1.385482E-01 | 1.597411 | 1 | 2.062705E-01 | 0.671682 | Ŝ, Â |
| 3 | Total signs | ≥6 | 21 | Finafloxacin & Doxycycline | 40 | Doxycycline | 40 | 1.524480 | 1 | 2.169427E-01 | 1.597411 | 1 | 2.062705E-01 | 1.051739 | Ŝ, Â |
| 3 | Average signs | ≥6 | 21 | Finafloxacin & Doxycycline | 40 | Doxycycline | 40 | 1.524480 | 1 | 2.169427E-01 | 1.597411 | 1 | 2.062705E-01 | 1.051739 | Ŝ, Â |
| 3 | Total signs | ≥6 | 22 | Finafloxacin & Doxycycline | 40 | Doxycycline | 40 | 1.507345 | 1 | 2.195447E-01 | 1.597411 | 1 | 2.062705E-01 | 1.064353 | Ŝ, Â |
| 3 | Average signs | ≥6 | 22 | Finafloxacin & Doxycycline | 40 | Doxycycline | 40 | 1.507345 | 1 | 2.195447E-01 | 1.597411 | 1 | 2.062705E-01 | 1.064353 | Ŝ, Â |
| 3 | Total signs | ≥6 | 23 | Finafloxacin & Doxycycline | 40 | Doxycycline | 40 | 1.123972 | 1 | 2.890648E-01 | 1.597411 | 1 | 2.062705E-01 | 1.401387 | Ŝ, Â |
| 3 | Average signs | ≥6 | 23 | Finafloxacin & Doxycycline | 40 | Doxycycline | 40 | 1.123972 | 1 | 2.890648E-01 | 1.597411 | 1 | 2.062705E-01 | 1.401387 | Ŝ, Â |
| 3 | Total signs | ≥6 | 24 | Finafloxacin & Doxycycline | 40 | Doxycycline | 40 | 1.077672 | 1 | 2.992189E-01 | 1.597411 | 1 | 2.062705E-01 | 1.450614 | Ŝ, Â |
| 3 | Average signs | ≥6 | 24 | Finafloxacin & Doxycycline | 40 | Doxycycline | 40 | 1.077672 | 1 | 2.992189E-01 | 1.597411 | 1 | 2.062705E-01 | 1.450614 | Ŝ, Â |
| 3 | Total signs | ≥6 | 25 | Finafloxacin & Doxycycline | 40 | Doxycycline | 40 | 0.660460 | 1 | 4.163976E-01 | 1.597411 | 1 | 2.062705E-01 | 2.018697 | Ŝ, Â |
| 3 | Average signs | ≥6 | 25 | Finafloxacin & Doxycycline | 40 | Doxycycline | 40 | 0.660460 | 1 | 4.163976E-01 | 1.597411 | 1 | 2.062705E-01 | 2.018697 | Ŝ, Â |
| 3 | Total signs | ≥6 | 26 | Finafloxacin & Doxycycline | 40 | Doxycycline | 40 | 0.768297 | 1 | 3.807445E-01 | 1.597411 | 1 | 2.062705E-01 | 1.845851 | Ŝ, Â |
| 3 | Average signs | ≥6 | 26 | Finafloxacin & Doxycycline | 40 | Doxycycline | 40 | 0.768297 | 1 | 3.807445E-01 | 1.597411 | 1 | 2.062705E-01 | 1.845851 | Ŝ, Â |
| 3 | Total signs | ≥6 | 27 | Finafloxacin & Doxycycline | 40 | Doxycycline | 40 | 0.354552 | 1 | 5.515474E-01 | 1.597411 | 1 | 2.062705E-01 | 2.673904 | Ŝ, Â |
| 3 | Average signs | ≥6 | 27 | Finafloxacin & Doxycycline | 40 | Doxycycline | 40 | 0.354552 | 1 | 5.515474E-01 | 1.597411 | 1 | 2.062705E-01 | 2.673904 | Ŝ, Â |
| 3 | Total signs | ≥6 | 28 | Finafloxacin & Doxycycline | 40 | Doxycycline | 40 | 0.832075 | 1 | 3.616731E-01 | 1.597411 | 1 | 2.062705E-01 | 1.753392 | Ŝ, Â |
| 3 | Average signs | ≥6 | 28 | Finafloxacin & Doxycycline | 40 | Doxycycline | 40 | 0.832075 | 1 | 3.616731E-01 | 1.597411 | 1 | 2.062705E-01 | 1.753392 | Ŝ, Â |
| 3 | Total signs | ≥6 | 29 | Finafloxacin & Doxycycline | 40 | Doxycycline | 40 | 0.832075 | 1 | 3.616731E-01 | 1.597411 | 1 | 2.062705E-01 | 1.753392 | Ŝ, Â |
| 3 | Average signs | ≥6 | 29 | Finafloxacin & Doxycycline | 40 | Doxycycline | 40 | 0.832075 | 1 | 3.616731E-01 | 1.597411 | 1 | 2.062705E-01 | 1.753392 | Ŝ, Â |
| 3 | Total signs | ≥6 | 30 | Finafloxacin & Doxycycline | 40 | Doxycycline | 40 | 1.597411 | 1 | 2.062705E-01 | 1.597411 | 1 | 2.062705E-01 | 1.000000 | Ŝ, Â |
| 3 | Average signs | ≥6 | 30 | Finafloxacin & Doxycycline | 40 | Doxycycline | 40 | 1.597411 | 1 | 2.062705E-01 | 1.597411 | 1 | 2.062705E-01 | 1.000000 | Ŝ, Â |
| 4 | Total signs | ≥6 | 20 | Finafloxacin 36 h | 45 | Finafloxacin 48 h | 44 | 0.445966 | 1 | 5.042569E-01 | 1.730962 | 1 | 1.882881E-01 | 2.678114 | Ŝ, Â |
| 4 | Average signs | ≥6 | 20 | Finafloxacin 36 h | 45 | Finafloxacin 48 h | 44 | 0.445966 | 1 | 5.042569E-01 | 1.730962 | 1 | 1.882881E-01 | 2.678114 | Ŝ, Â |
| 4 | Total signs | ≥6 | 21 | Finafloxacin 36 h | 45 | Finafloxacin 48 h | 44 | 0.235782 | 1 | 6.272695E-01 | 1.730962 | 1 | 1.882881E-01 | 3.331435 | Ŝ, Â |
| 4 | Average signs | ≥6 | 21 | Finafloxacin 36 h | 45 | Finafloxacin 48 h | 44 | 0.235782 | 1 | 6.272695E-01 | 1.730962 | 1 | 1.882881E-01 | 3.331435 | Ŝ, Â |
| 4 | Total signs | ≥6 | 22 | Finafloxacin 36 h | 45 | Finafloxacin 48 h | 44 | 0.454321 | 1 | 5.002902E-01 | 1.730962 | 1 | 1.882881E-01 | 2.657047 | Ŝ, Â |
| 4 | Average signs | ≥6 | 22 | Finafloxacin 36 h | 45 | Finafloxacin 48 h | 44 | 0.454321 | 1 | 5.002902E-01 | 1.730962 | 1 | 1.882881E-01 | 2.657047 | Ŝ, Â |
| 4 | Total signs | ≥6 | 23 | Finafloxacin 36 h | 45 | Finafloxacin 48 h | 44 | 0.210916 | 1 | 6.460507E-01 | 1.730962 | 1 | 1.882881E-01 | 3.431182 | Ŝ, Â |
| 4 | Average signs | ≥6 | 23 | Finafloxacin 36 h | 45 | Finafloxacin 48 h | 44 | 0.211535 | 1 | 6.455672E-01 | 1.730962 | 1 | 1.882881E-01 | 3.428615 | Ŝ, Â |
| 4 | Total signs | ≥6 | 24 | Finafloxacin 36 h | 45 | Finafloxacin 48 h | 44 | 0.309805 | 1 | 5.777999E-01 | 1.730962 | 1 | 1.882881E-01 | 3.068702 | Ŝ, Â |
| 4 | Average signs | ≥6 | 24 | Finafloxacin 36 h | 45 | Finafloxacin 48 h | 44 | 0.570395 | 1 | 4.501019E-01 | 1.730962 | 1 | 1.882881E-01 | 2.390496 | Ŝ, Â |
| 4 | Total signs | ≥6 | 25 | Finafloxacin 36 h | 45 | Finafloxacin 48 h | 44 | 0.607727 | 1 | 4.356448E-01 | 1.730962 | 1 | 1.882881E-01 | 2.313714 | Ŝ, Â |
| 4 | Average signs | ≥6 | 25 | Finafloxacin 36 h | 45 | Finafloxacin 48 h | 44 | 0.960632 | 1 | 3.270278E-01 | 1.730962 | 1 | 1.882881E-01 | 1.736848 | Ŝ, Â |
| 4 | Total signs | ≥6 | 26 | Finafloxacin 36 h | 45 | Finafloxacin 48 h | 44 | 0.616350 | 1 | 4.324069E-01 | 1.730962 | 1 | 1.882881E-01 | 2.296518 | Ŝ, Â |
| 4 | Average signs | ≥6 | 26 | Finafloxacin 36 h | 45 | Finafloxacin 48 h | 44 | 0.971426 | 1 | 3.243248E-01 | 1.730962 | 1 | 1.882881E-01 | 1.722493 | Ŝ, Â |
| 4 | Total signs | ≥6 | 27 | Finafloxacin 36 h | 45 | Finafloxacin 48 h | 44 | 0.598801 | 1 | 4.390357E-01 | 1.730962 | 1 | 1.882881E-01 | 2.331723 | Ŝ, Â |
| 4 | Average signs | ≥6 | 27 | Finafloxacin 36 h | 45 | Finafloxacin 48 h | 44 | 0.949191 | 1 | 3.299252E-01 | 1.730962 | 1 | 1.882881E-01 | 1.752236 | Ŝ, Â |
| 4 | Total signs | ≥6 | 28 | Finafloxacin 36 h | 45 | Finafloxacin 48 h | 44 | 0.876175 | 1 | 3.492515E-01 | 1.730962 | 1 | 1.882881E-01 | 1.854878 | Ŝ, Â |
| 4 | Average signs | ≥6 | 28 | Finafloxacin 36 h | 45 | Finafloxacin 48 h | 44 | 1.281959 | 1 | 2.575351E-01 | 1.730962 | 1 | 1.882881E-01 | 1.367772 | Ŝ, Â |
| 4 | Total signs | ≥6 | 29 | Finafloxacin 36 h | 45 | Finafloxacin 48 h | 44 | 1.283321 | 1 | 2.572826E-01 | 1.730962 | 1 | 1.882881E-01 | 1.366430 | Ŝ, Â |
| 4 | Average signs | ≥6 | 29 | Finafloxacin 36 h | 45 | Finafloxacin 48 h | 44 | 1.785758 | 1 | 1.814439E-01 | 1.730962 | 1 | 1.882881E-01 | 0.963650 | Ŝ, Â |
| 4 | Total signs | ≥6 | 30 | Finafloxacin 36 h | 45 | Finafloxacin 48 h | 44 | 1.253376 | 1 | 2.629086E-01 | 1.730962 | 1 | 1.882881E-01 | 1.396310 | Ŝ, Â |
| 4 | Average signs | ≥6 | 30 | Finafloxacin 36 h | 45 | Finafloxacin 48 h | 44 | 1.749705 | 1 | 1.859138E-01 | 1.730962 | 1 | 1.882881E-01 | 0.987390 | Ŝ, Â |
| 4 | Total signs | ≥6 | 20 | Finafloxacin 36 h | 45 | Diluent Control | 88 | 94.766888 | 1 | 2.141784E-22 | 94.766888 | 1 | 2.141784E-22 | 1.000000 | S, A |
| 4 | Average signs | ≥6 | 20 | Finafloxacin 36 h | 45 | Diluent Control | 88 | 94.766888 | 1 | 2.141784E-22 | 94.766888 | 1 | 2.141784E-22 | 1.000000 | S, A |
| 4 | Total signs | ≥6 | 21 | Finafloxacin 36 h | 45 | Diluent Control | 88 | 94.766888 | 1 | 2.141784E-22 | 94.766888 | 1 | 2.141784E-22 | 1.000000 | S, A |
| 4 | Average signs | ≥6 | 21 | Finafloxacin 36 h | 45 | Diluent Control | 88 | 94.766888 | 1 | 2.141784E-22 | 94.766888 | 1 | 2.141784E-22 | 1.000000 | S, A |
| 4 | Total signs | ≥6 | 22 | Finafloxacin 36 h | 45 | Diluent Control | 88 | 94.766888 | 1 | 2.141784E-22 | 94.766888 | 1 | 2.141784E-22 | 1.000000 | S, A |
| 4 | Average signs | ≥6 | 22 | Finafloxacin 36 h | 45 | Diluent Control | 88 | 94.766888 | 1 | 2.141784E-22 | 94.766888 | 1 | 2.141784E-22 | 1.000000 | S, A |
| 4 | Total signs | ≥6 | 23 | Finafloxacin 36 h | 45 | Diluent Control | 88 | 94.766888 | 1 | 2.141784E-22 | 94.766888 | 1 | 2.141784E-22 | 1.000000 | S, A |
| 4 | Average signs | ≥6 | 23 | Finafloxacin 36 h | 45 | Diluent Control | 88 | 94.766888 | 1 | 2.141784E-22 | 94.766888 | 1 | 2.141784E-22 | 1.000000 | S, A |
| 4 | Total signs | ≥6 | 24 | Finafloxacin 36 h | 45 | Diluent Control | 88 | 94.766888 | 1 | 2.141784E-22 | 94.766888 | 1 | 2.141784E-22 | 1.000000 | S, A |
| 4 | Average signs | ≥6 | 24 | Finafloxacin 36 h | 45 | Diluent Control | 88 | 94.766888 | 1 | 2.141784E-22 | 94.766888 | 1 | 2.141784E-22 | 1.000000 | S, A |
| 4 | Total signs | ≥6 | 25 | Finafloxacin 36 h | 45 | Diluent Control | 88 | 94.766888 | 1 | 2.141784E-22 | 94.766888 | 1 | 2.141784E-22 | 1.000000 | S, A |
| 4 | Average signs | ≥6 | 25 | Finafloxacin 36 h | 45 | Diluent Control | 88 | 94.766888 | 1 | 2.141784E-22 | 94.766888 | 1 | 2.141784E-22 | 1.000000 | S, A |
| 4 | Total signs | ≥6 | 26 | Finafloxacin 36 h | 45 | Diluent Control | 88 | 94.766888 | 1 | 2.141784E-22 | 94.766888 | 1 | 2.141784E-22 | 1.000000 | S, A |
| 4 | Average signs | ≥6 | 26 | Finafloxacin 36 h | 45 | Diluent Control | 88 | 94.766888 | 1 | 2.141784E-22 | 94.766888 | 1 | 2.141784E-22 | 1.000000 | S, A |
| 4 | Total signs | ≥6 | 27 | Finafloxacin 36 h | 45 | Diluent Control | 88 | 94.766888 | 1 | 2.141784E-22 | 94.766888 | 1 | 2.141784E-22 | 1.000000 | S, A |
| 4 | Average signs | ≥6 | 27 | Finafloxacin 36 h | 45 | Diluent Control | 88 | 94.766888 | 1 | 2.141784E-22 | 94.766888 | 1 | 2.141784E-22 | 1.000000 | S, A |
| 4 | Total signs | ≥6 | 28 | Finafloxacin 36 h | 45 | Diluent Control | 88 | 94.766888 | 1 | 2.141784E-22 | 94.766888 | 1 | 2.141784E-22 | 1.000000 | S, A |
| 4 | Average signs | ≥6 | 28 | Finafloxacin 36 h | 45 | Diluent Control | 88 | 94.766888 | 1 | 2.141784E-22 | 94.766888 | 1 | 2.141784E-22 | 1.000000 | S, A |
| 4 | Total signs | ≥6 | 29 | Finafloxacin 36 h | 45 | Diluent Control | 88 | 94.766888 | 1 | 2.141784E-22 | 94.766888 | 1 | 2.141784E-22 | 1.000000 | S, A |
| 4 | Average signs | ≥6 | 29 | Finafloxacin 36 h | 45 | Diluent Control | 88 | 94.766888 | 1 | 2.141784E-22 | 94.766888 | 1 | 2.141784E-22 | 1.000000 | S, A |
| 4 | Total signs | ≥6 | 30 | Finafloxacin 36 h | 45 | Diluent Control | 88 | 94.766888 | 1 | 2.141784E-22 | 94.766888 | 1 | 2.141784E-22 | 1.000000 | S, A |
| 4 | Average signs | ≥6 | 30 | Finafloxacin 36 h | 45 | Diluent Control | 88 | 94.766888 | 1 | 2.141784E-22 | 94.766888 | 1 | 2.141784E-22 | 1.000000 | S, A |
| 4 | Total signs | ≥6 | 20 | Finafloxacin 48 h | 44 | Diluent Control | 88 | 72.966845 | 1 | 1.318462E-17 | 72.966845 | 1 | 1.318462E-17 | 1.000000 | S, A |
| 4 | Average signs | ≥6 | 20 | Finafloxacin 48 h | 44 | Diluent Control | 88 | 72.966845 | 1 | 1.318462E-17 | 72.966845 | 1 | 1.318462E-17 | 1.000000 | S, A |
| 4 | Total signs | ≥6 | 21 | Finafloxacin 48 h | 44 | Diluent Control | 88 | 72.966845 | 1 | 1.318462E-17 | 72.966845 | 1 | 1.318462E-17 | 1.000000 | S, A |
| 4 | Average signs | ≥6 | 21 | Finafloxacin 48 h | 44 | Diluent Control | 88 | 72.966845 | 1 | 1.318462E-17 | 72.966845 | 1 | 1.318462E-17 | 1.000000 | S, A |
| 4 | Total signs | ≥6 | 22 | Finafloxacin 48 h | 44 | Diluent Control | 88 | 72.966845 | 1 | 1.318462E-17 | 72.966845 | 1 | 1.318462E-17 | 1.000000 | S, A |
| 4 | Average signs | ≥6 | 22 | Finafloxacin 48 h | 44 | Diluent Control | 88 | 72.966845 | 1 | 1.318462E-17 | 72.966845 | 1 | 1.318462E-17 | 1.000000 | S, A |
| 4 | Total signs | ≥6 | 23 | Finafloxacin 48 h | 44 | Diluent Control | 88 | 72.966845 | 1 | 1.318462E-17 | 72.966845 | 1 | 1.318462E-17 | 1.000000 | S, A |
| 4 | Average signs | ≥6 | 23 | Finafloxacin 48 h | 44 | Diluent Control | 88 | 72.966845 | 1 | 1.318462E-17 | 72.966845 | 1 | 1.318462E-17 | 1.000000 | S, A |
| 4 | Total signs | ≥6 | 24 | Finafloxacin 48 h | 44 | Diluent Control | 88 | 72.966845 | 1 | 1.318462E-17 | 72.966845 | 1 | 1.318462E-17 | 1.000000 | S, A |
| 4 | Average signs | ≥6 | 24 | Finafloxacin 48 h | 44 | Diluent Control | 88 | 72.966845 | 1 | 1.318462E-17 | 72.966845 | 1 | 1.318462E-17 | 1.000000 | S, A |
| 4 | Total signs | ≥6 | 25 | Finafloxacin 48 h | 44 | Diluent Control | 88 | 72.966845 | 1 | 1.318462E-17 | 72.966845 | 1 | 1.318462E-17 | 1.000000 | S, A |
| 4 | Average signs | ≥6 | 25 | Finafloxacin 48 h | 44 | Diluent Control | 88 | 72.966845 | 1 | 1.318462E-17 | 72.966845 | 1 | 1.318462E-17 | 1.000000 | S, A |
| 4 | Total signs | ≥6 | 26 | Finafloxacin 48 h | 44 | Diluent Control | 88 | 72.966845 | 1 | 1.318462E-17 | 72.966845 | 1 | 1.318462E-17 | 1.000000 | S, A |
| 4 | Average signs | ≥6 | 26 | Finafloxacin 48 h | 44 | Diluent Control | 88 | 72.966845 | 1 | 1.318462E-17 | 72.966845 | 1 | 1.318462E-17 | 1.000000 | S, A |
| 4 | Total signs | ≥6 | 27 | Finafloxacin 48 h | 44 | Diluent Control | 88 | 72.966845 | 1 | 1.318462E-17 | 72.966845 | 1 | 1.318462E-17 | 1.000000 | S, A |
| 4 | Average signs | ≥6 | 27 | Finafloxacin 48 h | 44 | Diluent Control | 88 | 72.966845 | 1 | 1.318462E-17 | 72.966845 | 1 | 1.318462E-17 | 1.000000 | S, A |
| 4 | Total signs | ≥6 | 28 | Finafloxacin 48 h | 44 | Diluent Control | 88 | 72.966845 | 1 | 1.318462E-17 | 72.966845 | 1 | 1.318462E-17 | 1.000000 | S, A |
| 4 | Average signs | ≥6 | 28 | Finafloxacin 48 h | 44 | Diluent Control | 88 | 72.966845 | 1 | 1.318462E-17 | 72.966845 | 1 | 1.318462E-17 | 1.000000 | S, A |
| 4 | Total signs | ≥6 | 29 | Finafloxacin 48 h | 44 | Diluent Control | 88 | 72.966845 | 1 | 1.318462E-17 | 72.966845 | 1 | 1.318462E-17 | 1.000000 | S, A |
| 4 | Average signs | ≥6 | 29 | Finafloxacin 48 h | 44 | Diluent Control | 88 | 72.966845 | 1 | 1.318462E-17 | 72.966845 | 1 | 1.318462E-17 | 1.000000 | S, A |
| 4 | Total signs | ≥6 | 30 | Finafloxacin 48 h | 44 | Diluent Control | 88 | 72.966845 | 1 | 1.318462E-17 | 72.966845 | 1 | 1.318462E-17 | 1.000000 | S, A |
| 4 | Average signs | ≥6 | 30 | Finafloxacin 48 h | 44 | Diluent Control | 88 | 72.966845 | 1 | 1.318462E-17 | 72.966845 | 1 | 1.318462E-17 | 1.000000 | S, A |

n = number of mice, df = degrees of freedom, S = Significant difference in original study comparison, A = Significant difference in alternative comparison, Ŝ = No significant difference in original study comparison, Â = No significant difference in alternative comparison.

**Table A3.** Logrank test results for the comparisons between treatment groups for each of the four studies, split by the weight threshold value. Information for the logrank test using the alternative endpoint comparison and orginal study comparison are presented, along with the p-value ratio and indicator of whether a change in significance resulted. These data were used for Figure A2.

| **Study** | **Weight Threshold** | **Comparison  Group A** | | **Comparison  Group B** | | **Alternative endpoint  Comparison** | | | **Original study  comparison** | | | **P-value ratio** | **P-value  ratio change** |
| --- | --- | --- | --- | --- | --- | --- | --- | --- | --- | --- | --- | --- | --- |
| **Treatment** | **n** | **Treatment** | **n** | **Test statistic** | **df** | **p-value** | **Test statistic** | **df** | **p-value** |
| 1 | 20 | Finafloxacin | 45 | Diluent Control | 15 | 83.192904 | 1 | 7.442441E-20 | 83.192904 | 1 | 7.442441E-20 | 1.000000 | S, A |
| 1 | 21 | Finafloxacin | 45 | Diluent Control | 15 | 83.192904 | 1 | 7.442441E-20 | 83.192904 | 1 | 7.442441E-20 | 1.000000 | S, A |
| 1 | 22 | Finafloxacin | 45 | Diluent Control | 15 | 83.192904 | 1 | 7.442441E-20 | 83.192904 | 1 | 7.442441E-20 | 1.000000 | S, A |
| 1 | 23 | Finafloxacin | 45 | Diluent Control | 15 | 83.192904 | 1 | 7.442441E-20 | 83.192904 | 1 | 7.442441E-20 | 1.000000 | S, A |
| 1 | 24 | Finafloxacin | 45 | Diluent Control | 15 | 83.192904 | 1 | 7.442441E-20 | 83.192904 | 1 | 7.442441E-20 | 1.000000 | S, A |
| 1 | 25 | Finafloxacin | 45 | Diluent Control | 15 | 83.192904 | 1 | 7.442441E-20 | 83.192904 | 1 | 7.442441E-20 | 1.000000 | S, A |
| 1 | 26 | Finafloxacin | 45 | Diluent Control | 15 | 83.192904 | 1 | 7.442441E-20 | 83.192904 | 1 | 7.442441E-20 | 1.000000 | S, A |
| 1 | 27 | Finafloxacin | 45 | Diluent Control | 15 | 83.192904 | 1 | 7.442441E-20 | 83.192904 | 1 | 7.442441E-20 | 1.000000 | S, A |
| 1 | 28 | Finafloxacin | 45 | Diluent Control | 15 | 83.192904 | 1 | 7.442441E-20 | 83.192904 | 1 | 7.442441E-20 | 1.000000 | S, A |
| 1 | 29 | Finafloxacin | 45 | Diluent Control | 15 | 83.192904 | 1 | 7.442441E-20 | 83.192904 | 1 | 7.442441E-20 | 1.000000 | S, A |
| 1 | 30 | Finafloxacin | 45 | Diluent Control | 15 | 83.192904 | 1 | 7.442441E-20 | 83.192904 | 1 | 7.442441E-20 | 1.000000 | S, A |
| 1 | 20 | Co-trimoxazole | 45 | Diluent Control | 15 | 83.192904 | 1 | 7.442441E-20 | 83.192904 | 1 | 7.442441E-20 | 1.000000 | S, A |
| 1 | 21 | Co-trimoxazole | 45 | Diluent Control | 15 | 83.192904 | 1 | 7.442441E-20 | 83.192904 | 1 | 7.442441E-20 | 1.000000 | S, A |
| 1 | 22 | Co-trimoxazole | 45 | Diluent Control | 15 | 83.192904 | 1 | 7.442441E-20 | 83.192904 | 1 | 7.442441E-20 | 1.000000 | S, A |
| 1 | 23 | Co-trimoxazole | 45 | Diluent Control | 15 | 83.192904 | 1 | 7.442441E-20 | 83.192904 | 1 | 7.442441E-20 | 1.000000 | S, A |
| 1 | 24 | Co-trimoxazole | 45 | Diluent Control | 15 | 83.192904 | 1 | 7.442441E-20 | 83.192904 | 1 | 7.442441E-20 | 1.000000 | S, A |
| 1 | 25 | Co-trimoxazole | 45 | Diluent Control | 15 | 83.192904 | 1 | 7.442441E-20 | 83.192904 | 1 | 7.442441E-20 | 1.000000 | S, A |
| 1 | 26 | Co-trimoxazole | 45 | Diluent Control | 15 | 83.192904 | 1 | 7.442441E-20 | 83.192904 | 1 | 7.442441E-20 | 1.000000 | S, A |
| 1 | 27 | Co-trimoxazole | 45 | Diluent Control | 15 | 83.192904 | 1 | 7.442441E-20 | 83.192904 | 1 | 7.442441E-20 | 1.000000 | S, A |
| 1 | 28 | Co-trimoxazole | 45 | Diluent Control | 15 | 83.192904 | 1 | 7.442441E-20 | 83.192904 | 1 | 7.442441E-20 | 1.000000 | S, A |
| 1 | 29 | Co-trimoxazole | 45 | Diluent Control | 15 | 83.192904 | 1 | 7.442441E-20 | 83.192904 | 1 | 7.442441E-20 | 1.000000 | S, A |
| 1 | 30 | Co-trimoxazole | 45 | Diluent Control | 15 | 83.192904 | 1 | 7.442441E-20 | 83.192904 | 1 | 7.442441E-20 | 1.000000 | S, A |
| 1 | 20 | Co-trimoxazole | 45 | Finafloxacin | 45 | 1.764784 | 1 | 1.840289E-01 | 11.725428 | 1 | 6.165186E-04 | 298.496921 | S, Â |
| 1 | 21 | Co-trimoxazole | 45 | Finafloxacin | 45 | 4.005199 | 1 | 4.536014E-02 | 11.725428 | 1 | 6.165186E-04 | 73.574650 | S, A |
| 1 | 22 | Co-trimoxazole | 45 | Finafloxacin | 45 | 5.800621 | 1 | 1.602051E-02 | 11.725428 | 1 | 6.165186E-04 | 25.985450 | S, A |
| 1 | 23 | Co-trimoxazole | 45 | Finafloxacin | 45 | 9.455082 | 1 | 2.105649E-03 | 11.725428 | 1 | 6.165186E-04 | 3.415386 | S, A |
| 1 | 24 | Co-trimoxazole | 45 | Finafloxacin | 45 | 7.851441 | 1 | 5.078021E-03 | 11.725428 | 1 | 6.165186E-04 | 8.236607 | S, A |
| 1 | 25 | Co-trimoxazole | 45 | Finafloxacin | 45 | 7.409271 | 1 | 6.488862E-03 | 11.725428 | 1 | 6.165186E-04 | 10.525005 | S, A |
| 1 | 26 | Co-trimoxazole | 45 | Finafloxacin | 45 | 7.347731 | 1 | 6.714744E-03 | 11.725428 | 1 | 6.165186E-04 | 10.891388 | S, A |
| 1 | 27 | Co-trimoxazole | 45 | Finafloxacin | 45 | 9.624806 | 1 | 1.919667E-03 | 11.725428 | 1 | 6.165186E-04 | 3.113721 | S, A |
| 1 | 28 | Co-trimoxazole | 45 | Finafloxacin | 45 | 12.837690 | 1 | 3.397067E-04 | 11.725428 | 1 | 6.165186E-04 | 0.551008 | S, A |
| 1 | 29 | Co-trimoxazole | 45 | Finafloxacin | 45 | 12.038629 | 1 | 5.210929E-04 | 11.725428 | 1 | 6.165186E-04 | 0.845218 | S, A |
| 1 | 30 | Co-trimoxazole | 45 | Finafloxacin | 45 | 11.873783 | 1 | 5.692966E-04 | 11.725428 | 1 | 6.165186E-04 | 0.923405 | S, A |
| 2 | 20 | Finafloxacin | 90 | Diluent Control | 20 | 136.184833 | 1 | 1.817952E-31 | 136.184833 | 1 | 1.817952E-31 | 1.000000 | S, A |
| 2 | 21 | Finafloxacin | 90 | Diluent Control | 20 | 136.184833 | 1 | 1.817952E-31 | 136.184833 | 1 | 1.817952E-31 | 1.000000 | S, A |
| 2 | 22 | Finafloxacin | 90 | Diluent Control | 20 | 136.184833 | 1 | 1.817952E-31 | 136.184833 | 1 | 1.817952E-31 | 1.000000 | S, A |
| 2 | 23 | Finafloxacin | 90 | Diluent Control | 20 | 136.184833 | 1 | 1.817952E-31 | 136.184833 | 1 | 1.817952E-31 | 1.000000 | S, A |
| 2 | 24 | Finafloxacin | 90 | Diluent Control | 20 | 136.184833 | 1 | 1.817952E-31 | 136.184833 | 1 | 1.817952E-31 | 1.000000 | S, A |
| 2 | 25 | Finafloxacin | 90 | Diluent Control | 20 | 136.184833 | 1 | 1.817952E-31 | 136.184833 | 1 | 1.817952E-31 | 1.000000 | S, A |
| 2 | 26 | Finafloxacin | 90 | Diluent Control | 20 | 136.184833 | 1 | 1.817952E-31 | 136.184833 | 1 | 1.817952E-31 | 1.000000 | S, A |
| 2 | 27 | Finafloxacin | 90 | Diluent Control | 20 | 136.184833 | 1 | 1.817952E-31 | 136.184833 | 1 | 1.817952E-31 | 1.000000 | S, A |
| 2 | 28 | Finafloxacin | 90 | Diluent Control | 20 | 136.184833 | 1 | 1.817952E-31 | 136.184833 | 1 | 1.817952E-31 | 1.000000 | S, A |
| 2 | 29 | Finafloxacin | 90 | Diluent Control | 20 | 136.184833 | 1 | 1.817952E-31 | 136.184833 | 1 | 1.817952E-31 | 1.000000 | S, A |
| 2 | 30 | Finafloxacin | 90 | Diluent Control | 20 | 136.184833 | 1 | 1.817952E-31 | 136.184833 | 1 | 1.817952E-31 | 1.000000 | S, A |
| 3 | 20 | Finafloxacin | 40 | Diluent Control | 15 | 65.229390 | 1 | 6.666781E-16 | 65.229390 | 1 | 6.666781E-16 | 1.000000 | S, A |
| 3 | 21 | Finafloxacin | 40 | Diluent Control | 15 | 65.229390 | 1 | 6.666781E-16 | 65.229390 | 1 | 6.666781E-16 | 1.000000 | S, A |
| 3 | 22 | Finafloxacin | 40 | Diluent Control | 15 | 65.229390 | 1 | 6.666781E-16 | 65.229390 | 1 | 6.666781E-16 | 1.000000 | S, A |
| 3 | 23 | Finafloxacin | 40 | Diluent Control | 15 | 65.229390 | 1 | 6.666781E-16 | 65.229390 | 1 | 6.666781E-16 | 1.000000 | S, A |
| 3 | 24 | Finafloxacin | 40 | Diluent Control | 15 | 65.229390 | 1 | 6.666781E-16 | 65.229390 | 1 | 6.666781E-16 | 1.000000 | S, A |
| 3 | 25 | Finafloxacin | 40 | Diluent Control | 15 | 65.229390 | 1 | 6.666781E-16 | 65.229390 | 1 | 6.666781E-16 | 1.000000 | S, A |
| 3 | 26 | Finafloxacin | 40 | Diluent Control | 15 | 65.229390 | 1 | 6.666781E-16 | 65.229390 | 1 | 6.666781E-16 | 1.000000 | S, A |
| 3 | 27 | Finafloxacin | 40 | Diluent Control | 15 | 65.229390 | 1 | 6.666781E-16 | 65.229390 | 1 | 6.666781E-16 | 1.000000 | S, A |
| 3 | 28 | Finafloxacin | 40 | Diluent Control | 15 | 65.229390 | 1 | 6.666781E-16 | 65.229390 | 1 | 6.666781E-16 | 1.000000 | S, A |
| 3 | 29 | Finafloxacin | 40 | Diluent Control | 15 | 65.229390 | 1 | 6.666781E-16 | 65.229390 | 1 | 6.666781E-16 | 1.000000 | S, A |
| 3 | 30 | Finafloxacin | 40 | Diluent Control | 15 | 65.229390 | 1 | 6.666781E-16 | 65.229390 | 1 | 6.666781E-16 | 1.000000 | S, A |
| 3 | 20 | Doxycycline | 40 | Diluent Control | 15 | 65.229390 | 1 | 6.666781E-16 | 65.229390 | 1 | 6.666781E-16 | 1.000000 | S, A |
| 3 | 21 | Doxycycline | 40 | Diluent Control | 15 | 65.229390 | 1 | 6.666781E-16 | 65.229390 | 1 | 6.666781E-16 | 1.000000 | S, A |
| 3 | 22 | Doxycycline | 40 | Diluent Control | 15 | 65.229390 | 1 | 6.666781E-16 | 65.229390 | 1 | 6.666781E-16 | 1.000000 | S, A |
| 3 | 23 | Doxycycline | 40 | Diluent Control | 15 | 65.229390 | 1 | 6.666781E-16 | 65.229390 | 1 | 6.666781E-16 | 1.000000 | S, A |
| 3 | 24 | Doxycycline | 40 | Diluent Control | 15 | 65.229390 | 1 | 6.666781E-16 | 65.229390 | 1 | 6.666781E-16 | 1.000000 | S, A |
| 3 | 25 | Doxycycline | 40 | Diluent Control | 15 | 65.229390 | 1 | 6.666781E-16 | 65.229390 | 1 | 6.666781E-16 | 1.000000 | S, A |
| 3 | 26 | Doxycycline | 40 | Diluent Control | 15 | 65.229390 | 1 | 6.666781E-16 | 65.229390 | 1 | 6.666781E-16 | 1.000000 | S, A |
| 3 | 27 | Doxycycline | 40 | Diluent Control | 15 | 65.229390 | 1 | 6.666781E-16 | 65.229390 | 1 | 6.666781E-16 | 1.000000 | S, A |
| 3 | 28 | Doxycycline | 40 | Diluent Control | 15 | 65.229390 | 1 | 6.666781E-16 | 65.229390 | 1 | 6.666781E-16 | 1.000000 | S, A |
| 3 | 29 | Doxycycline | 40 | Diluent Control | 15 | 65.229390 | 1 | 6.666781E-16 | 65.229390 | 1 | 6.666781E-16 | 1.000000 | S, A |
| 3 | 30 | Doxycycline | 40 | Diluent Control | 15 | 65.229390 | 1 | 6.666781E-16 | 65.229390 | 1 | 6.666781E-16 | 1.000000 | S, A |
| 3 | 20 | Doxycycline | 40 | Finafloxacin | 40 | 6.377765 | 1 | 1.155589E-02 | 4.326465 | 1 | 3.752411E-02 | 0.307959 | S, A |
| 3 | 21 | Doxycycline | 40 | Finafloxacin | 40 | 5.112743 | 1 | 2.375075E-02 | 4.326465 | 1 | 3.752411E-02 | 0.632946 | S, A |
| 3 | 22 | Doxycycline | 40 | Finafloxacin | 40 | 5.111622 | 1 | 2.376609E-02 | 4.326465 | 1 | 3.752411E-02 | 0.633355 | S, A |
| 3 | 23 | Doxycycline | 40 | Finafloxacin | 40 | 3.475977 | 1 | 6.226596E-02 | 4.326465 | 1 | 3.752411E-02 | 1.659359 | S, Â |
| 3 | 24 | Doxycycline | 40 | Finafloxacin | 40 | 4.276748 | 1 | 3.863721E-02 | 4.326465 | 1 | 3.752411E-02 | 1.029664 | S, A |
| 3 | 25 | Doxycycline | 40 | Finafloxacin | 40 | 3.435375 | 1 | 6.381411E-02 | 4.326465 | 1 | 3.752411E-02 | 1.700616 | S, Â |
| 3 | 26 | Doxycycline | 40 | Finafloxacin | 40 | 2.565054 | 1 | 1.092488E-01 | 4.326465 | 1 | 3.752411E-02 | 2.911430 | S, Â |
| 3 | 27 | Doxycycline | 40 | Finafloxacin | 40 | 2.788552 | 1 | 9.493996E-02 | 4.326465 | 1 | 3.752411E-02 | 2.530106 | S, Â |
| 3 | 28 | Doxycycline | 40 | Finafloxacin | 40 | 4.326465 | 1 | 3.752411E-02 | 4.326465 | 1 | 3.752411E-02 | 1.000000 | S, A |
| 3 | 29 | Doxycycline | 40 | Finafloxacin | 40 | 4.326465 | 1 | 3.752411E-02 | 4.326465 | 1 | 3.752411E-02 | 1.000000 | S, A |
| 3 | 30 | Doxycycline | 40 | Finafloxacin | 40 | 4.326465 | 1 | 3.752411E-02 | 4.326465 | 1 | 3.752411E-02 | 1.000000 | S, A |
| 3 | 20 | Finafloxacin & Doxycycline | 40 | Diluent Control | 15 | 46.872846 | 1 | 7.574496E-12 | 46.872846 | 1 | 7.574496E-12 | 1.000000 | S, A |
| 3 | 21 | Finafloxacin & Doxycycline | 40 | Diluent Control | 15 | 46.872846 | 1 | 7.574496E-12 | 46.872846 | 1 | 7.574496E-12 | 1.000000 | S, A |
| 3 | 22 | Finafloxacin & Doxycycline | 40 | Diluent Control | 15 | 46.872846 | 1 | 7.574496E-12 | 46.872846 | 1 | 7.574496E-12 | 1.000000 | S, A |
| 3 | 23 | Finafloxacin & Doxycycline | 40 | Diluent Control | 15 | 46.872846 | 1 | 7.574496E-12 | 46.872846 | 1 | 7.574496E-12 | 1.000000 | S, A |
| 3 | 24 | Finafloxacin & Doxycycline | 40 | Diluent Control | 15 | 46.872846 | 1 | 7.574496E-12 | 46.872846 | 1 | 7.574496E-12 | 1.000000 | S, A |
| 3 | 25 | Finafloxacin & Doxycycline | 40 | Diluent Control | 15 | 46.872846 | 1 | 7.574496E-12 | 46.872846 | 1 | 7.574496E-12 | 1.000000 | S, A |
| 3 | 26 | Finafloxacin & Doxycycline | 40 | Diluent Control | 15 | 46.872846 | 1 | 7.574496E-12 | 46.872846 | 1 | 7.574496E-12 | 1.000000 | S, A |
| 3 | 27 | Finafloxacin & Doxycycline | 40 | Diluent Control | 15 | 46.872846 | 1 | 7.574496E-12 | 46.872846 | 1 | 7.574496E-12 | 1.000000 | S, A |
| 3 | 28 | Finafloxacin & Doxycycline | 40 | Diluent Control | 15 | 46.872846 | 1 | 7.574496E-12 | 46.872846 | 1 | 7.574496E-12 | 1.000000 | S, A |
| 3 | 29 | Finafloxacin & Doxycycline | 40 | Diluent Control | 15 | 46.872846 | 1 | 7.574496E-12 | 46.872846 | 1 | 7.574496E-12 | 1.000000 | S, A |
| 3 | 30 | Finafloxacin & Doxycycline | 40 | Diluent Control | 15 | 46.872846 | 1 | 7.574496E-12 | 46.872846 | 1 | 7.574496E-12 | 1.000000 | S, A |
| 3 | 20 | Finafloxacin & Doxycycline | 40 | Finafloxacin | 40 | 1.010082 | 1 | 3.148832E-01 | 0.709539 | 1 | 3.995968E-01 | 0.788002 | Ŝ, Â |
| 3 | 21 | Finafloxacin & Doxycycline | 40 | Finafloxacin | 40 | 1.022745 | 1 | 3.118688E-01 | 0.709539 | 1 | 3.995968E-01 | 0.780459 | Ŝ, Â |
| 3 | 22 | Finafloxacin & Doxycycline | 40 | Finafloxacin | 40 | 1.004097 | 1 | 3.163213E-01 | 0.709539 | 1 | 3.995968E-01 | 0.791601 | Ŝ, Â |
| 3 | 23 | Finafloxacin & Doxycycline | 40 | Finafloxacin | 40 | 0.543344 | 1 | 4.610503E-01 | 0.709539 | 1 | 3.995968E-01 | 1.153789 | Ŝ, Â |
| 3 | 24 | Finafloxacin & Doxycycline | 40 | Finafloxacin | 40 | 1.087494 | 1 | 2.970271E-01 | 0.709539 | 1 | 3.995968E-01 | 0.743317 | Ŝ, Â |
| 3 | 25 | Finafloxacin & Doxycycline | 40 | Finafloxacin | 40 | 1.101193 | 1 | 2.940044E-01 | 0.709539 | 1 | 3.995968E-01 | 0.735753 | Ŝ, Â |
| 3 | 26 | Finafloxacin & Doxycycline | 40 | Finafloxacin | 40 | 0.527210 | 1 | 4.677824E-01 | 0.709539 | 1 | 3.995968E-01 | 1.170636 | Ŝ, Â |
| 3 | 27 | Finafloxacin & Doxycycline | 40 | Finafloxacin | 40 | 1.142105 | 1 | 2.852081E-01 | 0.709539 | 1 | 3.995968E-01 | 0.713740 | Ŝ, Â |
| 3 | 28 | Finafloxacin & Doxycycline | 40 | Finafloxacin | 40 | 1.403252 | 1 | 2.361798E-01 | 0.709539 | 1 | 3.995968E-01 | 0.591045 | Ŝ, Â |
| 3 | 29 | Finafloxacin & Doxycycline | 40 | Finafloxacin | 40 | 1.403252 | 1 | 2.361798E-01 | 0.709539 | 1 | 3.995968E-01 | 0.591045 | Ŝ, Â |
| 3 | 30 | Finafloxacin & Doxycycline | 40 | Finafloxacin | 40 | 0.709539 | 1 | 3.995968E-01 | 0.709539 | 1 | 3.995968E-01 | 1.000000 | Ŝ, Â |
| 3 | 20 | Finafloxacin & Doxycycline | 40 | Doxycycline | 40 | 2.194010 | 1 | 1.385482E-01 | 1.597411 | 1 | 2.062705E-01 | 0.671682 | Ŝ, Â |
| 3 | 21 | Finafloxacin & Doxycycline | 40 | Doxycycline | 40 | 1.524480 | 1 | 2.169427E-01 | 1.597411 | 1 | 2.062705E-01 | 1.051739 | Ŝ, Â |
| 3 | 22 | Finafloxacin & Doxycycline | 40 | Doxycycline | 40 | 1.507345 | 1 | 2.195447E-01 | 1.597411 | 1 | 2.062705E-01 | 1.064353 | Ŝ, Â |
| 3 | 23 | Finafloxacin & Doxycycline | 40 | Doxycycline | 40 | 1.123972 | 1 | 2.890648E-01 | 1.597411 | 1 | 2.062705E-01 | 1.401387 | Ŝ, Â |
| 3 | 24 | Finafloxacin & Doxycycline | 40 | Doxycycline | 40 | 1.077672 | 1 | 2.992189E-01 | 1.597411 | 1 | 2.062705E-01 | 1.450614 | Ŝ, Â |
| 3 | 25 | Finafloxacin & Doxycycline | 40 | Doxycycline | 40 | 0.660460 | 1 | 4.163976E-01 | 1.597411 | 1 | 2.062705E-01 | 2.018697 | Ŝ, Â |
| 3 | 26 | Finafloxacin & Doxycycline | 40 | Doxycycline | 40 | 0.768297 | 1 | 3.807445E-01 | 1.597411 | 1 | 2.062705E-01 | 1.845851 | Ŝ, Â |
| 3 | 27 | Finafloxacin & Doxycycline | 40 | Doxycycline | 40 | 0.354552 | 1 | 5.515474E-01 | 1.597411 | 1 | 2.062705E-01 | 2.673904 | Ŝ, Â |
| 3 | 28 | Finafloxacin & Doxycycline | 40 | Doxycycline | 40 | 0.832075 | 1 | 3.616731E-01 | 1.597411 | 1 | 2.062705E-01 | 1.753392 | Ŝ, Â |
| 3 | 29 | Finafloxacin & Doxycycline | 40 | Doxycycline | 40 | 0.832075 | 1 | 3.616731E-01 | 1.597411 | 1 | 2.062705E-01 | 1.753392 | Ŝ, Â |
| 3 | 30 | Finafloxacin & Doxycycline | 40 | Doxycycline | 40 | 1.597411 | 1 | 2.062705E-01 | 1.597411 | 1 | 2.062705E-01 | 1.000000 | Ŝ, Â |
| 4 | 20 | Finafloxacin 36 h | 45 | Finafloxacin 48 h | 44 | 0.445966 | 1 | 5.042569E-01 | 1.730962 | 1 | 1.882881E-01 | 2.678114 | Ŝ, Â |
| 4 | 21 | Finafloxacin 36 h | 45 | Finafloxacin 48 h | 44 | 0.235782 | 1 | 6.272695E-01 | 1.730962 | 1 | 1.882881E-01 | 3.331435 | Ŝ, Â |
| 4 | 22 | Finafloxacin 36 h | 45 | Finafloxacin 48 h | 44 | 0.454321 | 1 | 5.002902E-01 | 1.730962 | 1 | 1.882881E-01 | 2.657047 | Ŝ, Â |
| 4 | 23 | Finafloxacin 36 h | 45 | Finafloxacin 48 h | 44 | 0.211535 | 1 | 6.455672E-01 | 1.730962 | 1 | 1.882881E-01 | 3.428615 | Ŝ, Â |
| 4 | 24 | Finafloxacin 36 h | 45 | Finafloxacin 48 h | 44 | 0.570395 | 1 | 4.501019E-01 | 1.730962 | 1 | 1.882881E-01 | 2.390496 | Ŝ, Â |
| 4 | 25 | Finafloxacin 36 h | 45 | Finafloxacin 48 h | 44 | 0.960632 | 1 | 3.270278E-01 | 1.730962 | 1 | 1.882881E-01 | 1.736848 | Ŝ, Â |
| 4 | 26 | Finafloxacin 36 h | 45 | Finafloxacin 48 h | 44 | 0.971426 | 1 | 3.243248E-01 | 1.730962 | 1 | 1.882881E-01 | 1.722493 | Ŝ, Â |
| 4 | 27 | Finafloxacin 36 h | 45 | Finafloxacin 48 h | 44 | 0.949191 | 1 | 3.299252E-01 | 1.730962 | 1 | 1.882881E-01 | 1.752236 | Ŝ, Â |
| 4 | 28 | Finafloxacin 36 h | 45 | Finafloxacin 48 h | 44 | 1.281959 | 1 | 2.575351E-01 | 1.730962 | 1 | 1.882881E-01 | 1.367772 | Ŝ, Â |
| 4 | 29 | Finafloxacin 36 h | 45 | Finafloxacin 48 h | 44 | 1.785758 | 1 | 1.814439E-01 | 1.730962 | 1 | 1.882881E-01 | 0.963650 | Ŝ, Â |
| 4 | 30 | Finafloxacin 36 h | 45 | Finafloxacin 48 h | 44 | 1.749705 | 1 | 1.859138E-01 | 1.730962 | 1 | 1.882881E-01 | 0.987390 | Ŝ, Â |
| 4 | 20 | Finafloxacin 36 h | 45 | Diluent Control | 88 | 94.766888 | 1 | 2.141784E-22 | 94.766888 | 1 | 2.141784E-22 | 1.000000 | S, A |
| 4 | 21 | Finafloxacin 36 h | 45 | Diluent Control | 88 | 94.766888 | 1 | 2.141784E-22 | 94.766888 | 1 | 2.141784E-22 | 1.000000 | S, A |
| 4 | 22 | Finafloxacin 36 h | 45 | Diluent Control | 88 | 94.766888 | 1 | 2.141784E-22 | 94.766888 | 1 | 2.141784E-22 | 1.000000 | S, A |
| 4 | 23 | Finafloxacin 36 h | 45 | Diluent Control | 88 | 94.766888 | 1 | 2.141784E-22 | 94.766888 | 1 | 2.141784E-22 | 1.000000 | S, A |
| 4 | 24 | Finafloxacin 36 h | 45 | Diluent Control | 88 | 94.766888 | 1 | 2.141784E-22 | 94.766888 | 1 | 2.141784E-22 | 1.000000 | S, A |
| 4 | 25 | Finafloxacin 36 h | 45 | Diluent Control | 88 | 94.766888 | 1 | 2.141784E-22 | 94.766888 | 1 | 2.141784E-22 | 1.000000 | S, A |
| 4 | 26 | Finafloxacin 36 h | 45 | Diluent Control | 88 | 94.766888 | 1 | 2.141784E-22 | 94.766888 | 1 | 2.141784E-22 | 1.000000 | S, A |
| 4 | 27 | Finafloxacin 36 h | 45 | Diluent Control | 88 | 94.766888 | 1 | 2.141784E-22 | 94.766888 | 1 | 2.141784E-22 | 1.000000 | S, A |
| 4 | 28 | Finafloxacin 36 h | 45 | Diluent Control | 88 | 94.766888 | 1 | 2.141784E-22 | 94.766888 | 1 | 2.141784E-22 | 1.000000 | S, A |
| 4 | 29 | Finafloxacin 36 h | 45 | Diluent Control | 88 | 94.766888 | 1 | 2.141784E-22 | 94.766888 | 1 | 2.141784E-22 | 1.000000 | S, A |
| 4 | 30 | Finafloxacin 36 h | 45 | Diluent Control | 88 | 94.766888 | 1 | 2.141784E-22 | 94.766888 | 1 | 2.141784E-22 | 1.000000 | S, A |
| 4 | 20 | Finafloxacin 48 h | 44 | Diluent Control | 88 | 72.966845 | 1 | 1.318462E-17 | 72.966845 | 1 | 1.318462E-17 | 1.000000 | S, A |
| 4 | 21 | Finafloxacin 48 h | 44 | Diluent Control | 88 | 72.966845 | 1 | 1.318462E-17 | 72.966845 | 1 | 1.318462E-17 | 1.000000 | S, A |
| 4 | 22 | Finafloxacin 48 h | 44 | Diluent Control | 88 | 72.966845 | 1 | 1.318462E-17 | 72.966845 | 1 | 1.318462E-17 | 1.000000 | S, A |
| 4 | 23 | Finafloxacin 48 h | 44 | Diluent Control | 88 | 72.966845 | 1 | 1.318462E-17 | 72.966845 | 1 | 1.318462E-17 | 1.000000 | S, A |
| 4 | 24 | Finafloxacin 48 h | 44 | Diluent Control | 88 | 72.966845 | 1 | 1.318462E-17 | 72.966845 | 1 | 1.318462E-17 | 1.000000 | S, A |
| 4 | 25 | Finafloxacin 48 h | 44 | Diluent Control | 88 | 72.966845 | 1 | 1.318462E-17 | 72.966845 | 1 | 1.318462E-17 | 1.000000 | S, A |
| 4 | 26 | Finafloxacin 48 h | 44 | Diluent Control | 88 | 72.966845 | 1 | 1.318462E-17 | 72.966845 | 1 | 1.318462E-17 | 1.000000 | S, A |
| 4 | 27 | Finafloxacin 48 h | 44 | Diluent Control | 88 | 72.966845 | 1 | 1.318462E-17 | 72.966845 | 1 | 1.318462E-17 | 1.000000 | S, A |
| 4 | 28 | Finafloxacin 48 h | 44 | Diluent Control | 88 | 72.966845 | 1 | 1.318462E-17 | 72.966845 | 1 | 1.318462E-17 | 1.000000 | S, A |
| 4 | 29 | Finafloxacin 48 h | 44 | Diluent Control | 88 | 72.966845 | 1 | 1.318462E-17 | 72.966845 | 1 | 1.318462E-17 | 1.000000 | S, A |
| 4 | 30 | Finafloxacin 48 h | 44 | Diluent Control | 88 | 72.966845 | 1 | 1.318462E-17 | 72.966845 | 1 | 1.318462E-17 | 1.000000 | S, A |

n = number of mice, df = degrees of freedom, S = Significant difference in original study comparison, A = Significant difference in alternative comparison, Ŝ = No significant difference in original study comparison, Â = No significant difference in alternative comparison.

**Table A4.** Logrank test results for the comparisons between treatment groups for each of the four studies, split by the signs threshold metric type, and signs threshold value. Information for the logrank test using the alternative endpoint comparison and orginal study comparison are presented, along with the p-value ratio and indicator of whether a change in significance resulted. These data were used for Figure A3.

| **Study** | **Threshold Metric** | **Signs threshold** | **Comparison  Group A** | | **Comparison  Group B** | | **Alternative endpoint  Comparison** | | | **Original study  comparison** | | | **P-value ratio** | **P-value  ratio change** |
| --- | --- | --- | --- | --- | --- | --- | --- | --- | --- | --- | --- | --- | --- | --- |
| **Treatment** | **n** | **Treatment** | **n** | **Test statistic** | **df** | **p-value** | **Test statistic** | **df** | **p-value** |
| 1 | Total signs | ≥4 | Finafloxacin | 45 | Diluent Control | 15 | 83.192904 | 1 | 7.44244E-20 | 83.192904 | 1 | 7.44244E-20 | 1.000000 | S, A |
| 1 | Average signs | ≥4 | Finafloxacin | 45 | Diluent Control | 15 | 83.192904 | 1 | 7.44244E-20 | 83.192904 | 1 | 7.44244E-20 | 1.000000 | S, A |
| 1 | Total signs | ≥4 | Co-trimoxazole | 45 | Diluent Control | 15 | 83.192904 | 1 | 7.44244E-20 | 83.192904 | 1 | 7.44244E-20 | 1.000000 | S, A |
| 1 | Average signs | ≥4 | Co-trimoxazole | 45 | Diluent Control | 15 | 83.192904 | 1 | 7.44244E-20 | 83.192904 | 1 | 7.44244E-20 | 1.000000 | S, A |
| 1 | Total signs | ≥4 | Co-trimoxazole | 45 | Finafloxacin | 45 | 18.200148 | 1 | 1.98863E-05 | 11.725428 | 1 | 6.16519E-04 | 0.032256 | S, A |
| 1 | Average signs | ≥4 | Co-trimoxazole | 45 | Finafloxacin | 45 | 16.452245 | 1 | 4.98911E-05 | 11.725428 | 1 | 6.16519E-04 | 0.080924 | S, A |
| 2 | Total signs | ≥4 | Finafloxacin | 90 | Diluent Control | 20 | 136.184833 | 1 | 1.81795E-31 | 136.184833 | 1 | 1.81795E-31 | 1.000000 | S, A |
| 2 | Average signs | ≥4 | Finafloxacin | 90 | Diluent Control | 20 | 136.184833 | 1 | 1.81795E-31 | 136.184833 | 1 | 1.81795E-31 | 1.000000 | S, A |
| 3 | Total signs | ≥4 | Finafloxacin | 40 | Diluent Control | 15 | 65.229390 | 1 | 6.66678E-16 | 65.229390 | 1 | 6.66678E-16 | 1.000000 | S, A |
| 3 | Average signs | ≥4 | Finafloxacin | 40 | Diluent Control | 15 | 65.229390 | 1 | 6.66678E-16 | 65.229390 | 1 | 6.66678E-16 | 1.000000 | S, A |
| 3 | Total signs | ≥4 | Doxycycline | 40 | Diluent Control | 15 | 65.229390 | 1 | 6.66678E-16 | 65.229390 | 1 | 6.66678E-16 | 1.000000 | S, A |
| 3 | Average signs | ≥4 | Doxycycline | 40 | Diluent Control | 15 | 65.229390 | 1 | 6.66678E-16 | 65.229390 | 1 | 6.66678E-16 | 1.000000 | S, A |
| 3 | Total signs | ≥4 | Doxycycline | 40 | Finafloxacin | 40 | 4.668787 | 1 | 3.07156E-02 | 4.326465 | 1 | 3.75241E-02 | 0.818557 | S, A |
| 3 | Average signs | ≥4 | Doxycycline | 40 | Finafloxacin | 40 | 8.717642 | 1 | 3.15145E-03 | 4.326465 | 1 | 3.75241E-02 | 0.083985 | S, A |
| 3 | Total signs | ≥4 | Finafloxacin & Doxycycline | 40 | Diluent Control | 15 | 46.872846 | 1 | 7.57450E-12 | 46.872846 | 1 | 7.57450E-12 | 1.000000 | S, A |
| 3 | Average signs | ≥4 | Finafloxacin & Doxycycline | 40 | Diluent Control | 15 | 46.872846 | 1 | 7.57450E-12 | 46.872846 | 1 | 7.57450E-12 | 1.000000 | S, A |
| 3 | Total signs | ≥4 | Finafloxacin & Doxycycline | 40 | Finafloxacin | 40 | 1.299280 | 1 | 2.54345E-01 | 0.709539 | 1 | 3.99597E-01 | 0.636504 | Ŝ, Â |
| 3 | Average signs | ≥4 | Finafloxacin & Doxycycline | 40 | Finafloxacin | 40 | 0.709539 | 1 | 3.99597E-01 | 0.709539 | 1 | 3.99597E-01 | 1.000000 | Ŝ, Â |
| 3 | Total signs | ≥4 | Finafloxacin & Doxycycline | 40 | Doxycycline | 40 | 9.071851 | 1 | 2.59574E-03 | 1.597411 | 1 | 2.06270E-01 | 0.012584 | Ŝ, A |
| 3 | Average signs | ≥4 | Finafloxacin & Doxycycline | 40 | Doxycycline | 40 | 4.914739 | 1 | 2.66285E-02 | 1.597411 | 1 | 2.06270E-01 | 0.129095 | Ŝ, A |
| 4 | Total signs | ≥4 | Finafloxacin 36 h | 45 | Finafloxacin 48 h | 44 | 0.515316 | 1 | 4.72847E-01 | 1.730962 | 1 | 1.88288E-01 | 2.511293 | Ŝ, Â |
| 4 | Average signs | ≥4 | Finafloxacin 36 h | 45 | Finafloxacin 48 h | 44 | 0.307025 | 1 | 5.79512E-01 | 1.730962 | 1 | 1.88288E-01 | 3.077794 | Ŝ, Â |
| 4 | Total signs | ≥4 | Finafloxacin 36 h | 45 | Diluent Control | 88 | 94.766888 | 1 | 2.14178E-22 | 94.766888 | 1 | 2.14178E-22 | 1.000000 | S, A |
| 4 | Average signs | ≥4 | Finafloxacin 36 h | 45 | Diluent Control | 88 | 94.766888 | 1 | 2.14178E-22 | 94.766888 | 1 | 2.14178E-22 | 1.000000 | S, A |
| 4 | Total signs | ≥4 | Finafloxacin 48 h | 44 | Diluent Control | 88 | 72.966845 | 1 | 1.31846E-17 | 72.966845 | 1 | 1.31846E-17 | 1.000000 | S, A |
| 4 | Average signs | ≥4 | Finafloxacin 48 h | 44 | Diluent Control | 88 | 72.966845 | 1 | 1.31846E-17 | 72.966845 | 1 | 1.31846E-17 | 1.000000 | S, A |
| 1 | Total signs | ≥5 | Finafloxacin | 45 | Diluent Control | 15 | 83.192904 | 1 | 7.44244E-20 | 83.192904 | 1 | 7.44244E-20 | 1.000000 | S, A |
| 1 | Average signs | ≥5 | Finafloxacin | 45 | Diluent Control | 15 | 83.192904 | 1 | 7.44244E-20 | 83.192904 | 1 | 7.44244E-20 | 1.000000 | S, A |
| 1 | Total signs | ≥5 | Co-trimoxazole | 45 | Diluent Control | 15 | 83.192904 | 1 | 7.44244E-20 | 83.192904 | 1 | 7.44244E-20 | 1.000000 | S, A |
| 1 | Average signs | ≥5 | Co-trimoxazole | 45 | Diluent Control | 15 | 83.192904 | 1 | 7.44244E-20 | 83.192904 | 1 | 7.44244E-20 | 1.000000 | S, A |
| 1 | Total signs | ≥5 | Co-trimoxazole | 45 | Finafloxacin | 45 | 18.495978 | 1 | 1.70263E-05 | 11.725428 | 1 | 6.16519E-04 | 0.027617 | S, A |
| 1 | Average signs | ≥5 | Co-trimoxazole | 45 | Finafloxacin | 45 | 17.583146 | 1 | 2.75015E-05 | 11.725428 | 1 | 6.16519E-04 | 0.044608 | S, A |
| 2 | Total signs | ≥5 | Finafloxacin | 90 | Diluent Control | 20 | 136.184833 | 1 | 1.81795E-31 | 136.184833 | 1 | 1.81795E-31 | 1.000000 | S, A |
| 2 | Average signs | ≥5 | Finafloxacin | 90 | Diluent Control | 20 | 136.184833 | 1 | 1.81795E-31 | 136.184833 | 1 | 1.81795E-31 | 1.000000 | S, A |
| 3 | Total signs | ≥5 | Finafloxacin | 40 | Diluent Control | 15 | 65.229390 | 1 | 6.66678E-16 | 65.229390 | 1 | 6.66678E-16 | 1.000000 | S, A |
| 3 | Average signs | ≥5 | Finafloxacin | 40 | Diluent Control | 15 | 65.229390 | 1 | 6.66678E-16 | 65.229390 | 1 | 6.66678E-16 | 1.000000 | S, A |
| 3 | Total signs | ≥5 | Doxycycline | 40 | Diluent Control | 15 | 65.229390 | 1 | 6.66678E-16 | 65.229390 | 1 | 6.66678E-16 | 1.000000 | S, A |
| 3 | Average signs | ≥5 | Doxycycline | 40 | Diluent Control | 15 | 65.229390 | 1 | 6.66678E-16 | 65.229390 | 1 | 6.66678E-16 | 1.000000 | S, A |
| 3 | Total signs | ≥5 | Doxycycline | 40 | Finafloxacin | 40 | 7.230527 | 1 | 7.16742E-03 | 4.326465 | 1 | 3.75241E-02 | 0.191008 | S, A |
| 3 | Average signs | ≥5 | Doxycycline | 40 | Finafloxacin | 40 | 5.521333 | 1 | 1.87859E-02 | 4.326465 | 1 | 3.75241E-02 | 0.500637 | S, A |
| 3 | Total signs | ≥5 | Finafloxacin & Doxycycline | 40 | Diluent Control | 15 | 46.872846 | 1 | 7.57450E-12 | 46.872846 | 1 | 7.57450E-12 | 1.000000 | S, A |
| 3 | Average signs | ≥5 | Finafloxacin & Doxycycline | 40 | Diluent Control | 15 | 46.872846 | 1 | 7.57450E-12 | 46.872846 | 1 | 7.57450E-12 | 1.000000 | S, A |
| 3 | Total signs | ≥5 | Finafloxacin & Doxycycline | 40 | Finafloxacin | 40 | 0.161476 | 1 | 6.87801E-01 | 0.709539 | 1 | 3.99597E-01 | 1.721238 | Ŝ, Â |
| 3 | Average signs | ≥5 | Finafloxacin & Doxycycline | 40 | Finafloxacin | 40 | 0.709539 | 1 | 3.99597E-01 | 0.709539 | 1 | 3.99597E-01 | 1.000000 | Ŝ, Â |
| 3 | Total signs | ≥5 | Finafloxacin & Doxycycline | 40 | Doxycycline | 40 | 5.440163 | 1 | 1.96788E-02 | 1.597411 | 1 | 2.06270E-01 | 0.095403 | Ŝ, A |
| 3 | Average signs | ≥5 | Finafloxacin & Doxycycline | 40 | Doxycycline | 40 | 2.562879 | 1 | 1.09399E-01 | 1.597411 | 1 | 2.06270E-01 | 0.530368 | Ŝ, Â |
| 4 | Total signs | ≥5 | Finafloxacin 36 h | 45 | Finafloxacin 48 h | 44 | 0.335219 | 1 | 5.62602E-01 | 1.730962 | 1 | 1.88288E-01 | 2.987986 | Ŝ, Â |
| 4 | Average signs | ≥5 | Finafloxacin 36 h | 45 | Finafloxacin 48 h | 44 | 1.792966 | 1 | 1.80565E-01 | 1.730962 | 1 | 1.88288E-01 | 0.958984 | Ŝ, Â |
| 4 | Total signs | ≥5 | Finafloxacin 36 h | 45 | Diluent Control | 88 | 94.766888 | 1 | 2.14178E-22 | 94.766888 | 1 | 2.14178E-22 | 1.000000 | S, A |
| 4 | Average signs | ≥5 | Finafloxacin 36 h | 45 | Diluent Control | 88 | 94.766888 | 1 | 2.14178E-22 | 94.766888 | 1 | 2.14178E-22 | 1.000000 | S, A |
| 4 | Total signs | ≥5 | Finafloxacin 48 h | 44 | Diluent Control | 88 | 72.966845 | 1 | 1.31846E-17 | 72.966845 | 1 | 1.31846E-17 | 1.000000 | S, A |
| 4 | Average signs | ≥5 | Finafloxacin 48 h | 44 | Diluent Control | 88 | 72.966845 | 1 | 1.31846E-17 | 72.966845 | 1 | 1.31846E-17 | 1.000000 | S, A |
| 1 | Total signs | ≥6 | Finafloxacin | 45 | Diluent Control | 15 | 83.192904 | 1 | 7.44244E-20 | 83.192904 | 1 | 7.44244E-20 | 1.000000 | S, A |
| 1 | Average signs | ≥6 | Finafloxacin | 45 | Diluent Control | 15 | 83.192904 | 1 | 7.44244E-20 | 83.192904 | 1 | 7.44244E-20 | 1.000000 | S, A |
| 1 | Total signs | ≥6 | Co-trimoxazole | 45 | Diluent Control | 15 | 83.192904 | 1 | 7.44244E-20 | 83.192904 | 1 | 7.44244E-20 | 1.000000 | S, A |
| 1 | Average signs | ≥6 | Co-trimoxazole | 45 | Diluent Control | 15 | 83.192904 | 1 | 7.44244E-20 | 83.192904 | 1 | 7.44244E-20 | 1.000000 | S, A |
| 1 | Total signs | ≥6 | Co-trimoxazole | 45 | Finafloxacin | 45 | 15.099274 | 1 | 1.02003E-04 | 11.725428 | 1 | 6.16519E-04 | 0.165449 | S, A |
| 1 | Average signs | ≥6 | Co-trimoxazole | 45 | Finafloxacin | 45 | 15.885905 | 1 | 6.72779E-05 | 11.725428 | 1 | 6.16519E-04 | 0.109125 | S, A |
| 2 | Total signs | ≥6 | Finafloxacin | 90 | Diluent Control | 20 | 136.184833 | 1 | 1.81795E-31 | 136.184833 | 1 | 1.81795E-31 | 1.000000 | S, A |
| 2 | Average signs | ≥6 | Finafloxacin | 90 | Diluent Control | 20 | 136.184833 | 1 | 1.81795E-31 | 136.184833 | 1 | 1.81795E-31 | 1.000000 | S, A |
| 3 | Total signs | ≥6 | Finafloxacin | 40 | Diluent Control | 15 | 65.229390 | 1 | 6.66678E-16 | 65.229390 | 1 | 6.66678E-16 | 1.000000 | S, A |
| 3 | Average signs | ≥6 | Finafloxacin | 40 | Diluent Control | 15 | 65.229390 | 1 | 6.66678E-16 | 65.229390 | 1 | 6.66678E-16 | 1.000000 | S, A |
| 3 | Total signs | ≥6 | Doxycycline | 40 | Diluent Control | 15 | 65.229390 | 1 | 6.66678E-16 | 65.229390 | 1 | 6.66678E-16 | 1.000000 | S, A |
| 3 | Average signs | ≥6 | Doxycycline | 40 | Diluent Control | 15 | 65.229390 | 1 | 6.66678E-16 | 65.229390 | 1 | 6.66678E-16 | 1.000000 | S, A |
| 3 | Total signs | ≥6 | Doxycycline | 40 | Finafloxacin | 40 | 4.326465 | 1 | 3.75241E-02 | 4.326465 | 1 | 3.75241E-02 | 1.000000 | S, A |
| 3 | Average signs | ≥6 | Doxycycline | 40 | Finafloxacin | 40 | 4.326465 | 1 | 3.75241E-02 | 4.326465 | 1 | 3.75241E-02 | 1.000000 | S, A |
| 3 | Total signs | ≥6 | Finafloxacin & Doxycycline | 40 | Diluent Control | 15 | 46.872846 | 1 | 7.57450E-12 | 46.872846 | 1 | 7.57450E-12 | 1.000000 | S, A |
| 3 | Average signs | ≥6 | Finafloxacin & Doxycycline | 40 | Diluent Control | 15 | 46.872846 | 1 | 7.57450E-12 | 46.872846 | 1 | 7.57450E-12 | 1.000000 | S, A |
| 3 | Total signs | ≥6 | Finafloxacin & Doxycycline | 40 | Finafloxacin | 40 | 0.709539 | 1 | 3.99597E-01 | 0.709539 | 1 | 3.99597E-01 | 1.000000 | Ŝ, Â |
| 3 | Average signs | ≥6 | Finafloxacin & Doxycycline | 40 | Finafloxacin | 40 | 0.709539 | 1 | 3.99597E-01 | 0.709539 | 1 | 3.99597E-01 | 1.000000 | Ŝ, Â |
| 3 | Total signs | ≥6 | Finafloxacin & Doxycycline | 40 | Doxycycline | 40 | 1.597411 | 1 | 2.06270E-01 | 1.597411 | 1 | 2.06270E-01 | 1.000000 | Ŝ, Â |
| 3 | Average signs | ≥6 | Finafloxacin & Doxycycline | 40 | Doxycycline | 40 | 1.597411 | 1 | 2.06270E-01 | 1.597411 | 1 | 2.06270E-01 | 1.000000 | Ŝ, Â |
| 4 | Total signs | ≥6 | Finafloxacin 36 h | 45 | Finafloxacin 48 h | 44 | 1.237847 | 1 | 2.65886E-01 | 1.730962 | 1 | 1.88288E-01 | 1.412126 | Ŝ, Â |
| 4 | Average signs | ≥6 | Finafloxacin 36 h | 45 | Finafloxacin 48 h | 44 | 1.730962 | 1 | 1.88288E-01 | 1.730962 | 1 | 1.88288E-01 | 1.000000 | Ŝ, Â |
| 4 | Total signs | ≥6 | Finafloxacin 36 h | 45 | Diluent Control | 88 | 94.766888 | 1 | 2.14178E-22 | 94.766888 | 1 | 2.14178E-22 | 1.000000 | S, A |
| 4 | Average signs | ≥6 | Finafloxacin 36 h | 45 | Diluent Control | 88 | 94.766888 | 1 | 2.14178E-22 | 94.766888 | 1 | 2.14178E-22 | 1.000000 | S, A |
| 4 | Total signs | ≥6 | Finafloxacin 48 h | 44 | Diluent Control | 88 | 72.966845 | 1 | 1.31846E-17 | 72.966845 | 1 | 1.31846E-17 | 1.000000 | S, A |
| 4 | Average signs | ≥6 | Finafloxacin 48 h | 44 | Diluent Control | 88 | 72.966845 | 1 | 1.31846E-17 | 72.966845 | 1 | 1.31846E-17 | 1.000000 | S, A |

n = number of mice, df = degrees of freedom, S = Significant difference in original study comparison, A = Significant difference in alternative comparison, Ŝ = No significant difference in original study comparison, Â = No significant difference in alternative comparison.

**Copyright:** © Crown copyright (2024), Dstl. This material is licensed under the terms of the Open Government Licence except where otherwise stated. To view this licence, visit <http://www.nationalarchives.gov.uk/doc/open-government-licence/version/3> or write to the Information Policy Team, The National Archives, Kew, London TW9 4DU, or email: [psi@nationalarchives.gov.uk](mailto:psi@nationalarchives.gov.uk).
